# Validation and characterisation of a wheat GENIE3 network using an independent RNA-Seq dataset.

Sophie A. Harrington<sup>1</sup>, Anna E. Backhaus<sup>1</sup>, Ajit Singh<sup>2</sup>, Keywan Hassani-Pak<sup>2</sup>, Cristobal Uauy<sup>1\*</sup>

<sup>1</sup> John Innes Centre, Norwich Research Park, Norwich, NR4 7UH, United Kingdom

<sup>2</sup> Rothamsted Research, Harpenden, Hertfordshire, AL5 2JQ, United Kingdom

**\*Correspondence:**

Cristobal Uauy

[cristobal.uauy@jic.ac.uk](mailto:cristobal.uauy@jic.ac.uk)

## Abstract

Gene regulatory networks are powerful tools which facilitate hypothesis generation and candidate gene discovery. However, the extent to which the network predictions are biologically relevant is often unclear. Recently, as part of an analysis of the RefSeqv1.0 wheat transcriptome, a GENIE3 network which predicted targets of wheat transcription factors was produced. Here we have used an independent and publicly-available RNA-Seq dataset to validate the predictions of the wheat GENIE3 network for the senescence-regulating transcription factor *NAM-A1* (TraesCS6A02G108300). We re-analysed the RNA-Seq data against the RefSeqv1.0 genome and identified a *de novo* set of differentially expressed genes (DEGs) between the wild-type and *nam-a1* mutant which recapitulated the known role of *NAM-A1* in senescence and nutrient remobilisation. We found that the GENIE3-predicted target genes of *NAM-A1* overlap significantly with the *de novo* DEGs, more than would be expected for a random transcription factor. Based on high levels of overlap between GENIE3-predicted target genes and the *de novo* DEGs, we also identified a set of candidate senescence regulators. We then explored genome-wide trends in the network related to polyploidy and homoeolog expression levels and found that only homoeologous transcription factors are likely to share predicted targets in common. However, homoeologs in dynamic triads, i.e. with higher variation in homoeolog expression levels across tissues, are less likely to share predicted targets than stable triads. This suggests that homoeologs in dynamic triads are more likely to act on distinct pathways. This work demonstrates that the wheat GENIE3 network can provide biologically-relevant predictions of transcription factor targets, which can be used for candidate gene prediction and for global analyses of transcription factor function. The GENIE3 network has now been integrated into the KnetMiner web application, facilitating its use in future studies.

**Keywords:** Gene networks, GENIE3, Wheat, Senescence, RNA-Seq, Polyploidy

## 37 Introduction

38 Transcriptional regulation of gene expression is fundamental to all biological processes. Increasingly,  
39 this is studied using large-scale datasets obtained from RNA-Sequencing (RNA-Seq) experiments  
40 across multiple tissues, genotypes, treatments, and timepoints. As library preparation and sequencing  
41 costs fall, more and more RNA-Seq datasets are being published, providing a wealth of transcriptional  
42 information. These datasets are then available for integration into large-scale gene regulatory  
43 networks covering various biological conditions. In wheat (*Triticum aestivum*), genomic and  
44 transcriptomic analysis has historically been hampered by its large, repetitive polyploid genome [1].  
45 More recently, a high-quality genome and gene annotation has facilitated transcriptomics work in  
46 wheat [1, 2]. This has allowed the use of substantial RNA-Seq datasets to build gene regulatory  
47 networks and predict transcription factors involved in complex processes such as senescence [3] and  
48 grain development [4, 5]. However, these studies typically use bespoke RNA-Seq datasets to generate  
49 the regulatory networks, rather than exploiting publicly-available data.

50 Combining the data across multiple RNA-Seq studies allows new hypothesis generation beyond those  
51 possible in the initial individual publications. A key difficulty, however, in using publicly available  
52 datasets is the lack of consistency in metadata (e.g. relating to the experimental conditions, tissue  
53 sampling, developmental stage). Without clear labelling of sampling conditions, it is difficult, if not  
54 impossible, to compare RNA-Seq datasets that originated from different studies. While international  
55 efforts to standardise experimental data exist [6, 7], often these are not followed by researchers when  
56 publishing. To address this, a large effort was recently taken in polyploid wheat to integrate publicly-  
57 available RNA-Seq datasets into a common database (expVIP) [8]. This platform uses common  
58 metadata terms, manually annotated by the curators, to allow comparison between RNA-Seq datasets  
59 from different studies. This database has been updated with new wheat gene annotations, most  
60 recently following the release of the wheat reference genome (RefSeqv1.0) [2].

61 These large curated sets of transcriptome data can now be mined to build new gene regulatory  
62 networks covering many biological processes in wheat. Using 850 RNA-Seq datasets combined from  
63 multiple independent studies, gene co-expression networks for root, leaf, spike, and grain tissues, as  
64 well as abiotic and biotic stresses, were developed [2]. This same study also generated a network of  
65 predicting transcription factor - target relationships using the 850 independent RNA-Seq samples  
66 from a wide range of developmental, tissue, genotypes and stress conditions [2]. This network was  
67 created with the GENIE3 algorithm, which uses a Random Forests approach to predict the strength of  
68 putative regulatory links between a target gene and the expression pattern of input genes (i.e.  
69 transcription factors) [9]. The program produces a ranked list output of each pairwise comparison  
70 ranked from the most confident to the least confident regulatory connection. GENIE3 was able to  
71 recapitulate known genetic regulatory networks in *Escherichia coli* when first tested. Since its  
72 introduction, the GENIE3 algorithm has been used to identify tissue-specific gene regulatory  
73 networks in maize [10] and key regulatory genes in glaucoma [11], as well as to study the drought  
74 response in sunflower [12]. Previous studies have integrated the GENIE3 network predictions with  
75 ChIP-Seq and other proteomic and transcriptomic data and found that the GENIE3 predictions do  
76 correspond with independent biological datasets [10, 13].

77 Here we have conducted a series of analyses to investigate whether the GENIE3 network provides  
78 biologically-relevant information in polyploid wheat. As a first case study, we re-analysed the RNA-  
79 Seq datasets from Pearce *et al.* [14] which examined gene expression of the NAC transcription factor  
80 *NAM-A1*. This transcription factor is known to affect monocarpic senescence and nutrient  
81 remobilisation in polyploid wheat, affecting gene expression even before visual signs of senescence  
82 can be observed (e.g. 12 days after anthesis in flag leaf) [14, 15]. We compared the differentially  
83 expressed genes between wild-type and *nam-a1* mutant lines with the GENIE3 predicted targets of the  
84 *NAM-A1* transcription factor [14]. This publicly-available RNA-Seq data was not used in the

85 generation of the GENIE3 network, thus serving as an independent dataset for validation purposes.  
86 We then explored the GENIE3 network for genome-wide trends relating to polyploidy and  
87 investigated the putative functions of targets for wheat transcription factors. Finally, we integrated the  
88 GENIE3 network into the KnetMiner web application [16] to facilitate exploration of the data within a  
89 wider context.

90

## 91 **Methods**

### 92 **GENIE3**

93 The GENIE3 network was previously published in [2] and made available at  
94 <https://doi.org/10.5447/ipk/2018/7>. In brief, it utilised a set of 850 publicly-available RNA-Seq  
95 samples in a Random Forests approach to predict targets of wheat 3,384 transcription factors [9]. The  
96 top one million connections in the network were used for all analyses in the paper, consistent with  
97 previous studies [2, 10]. Target genes of particular transcription factors were extracted from the  
98 network as in “Genie3\_Statistics\_SharedRatios\_RNASeqDEGs\_Figure1.Rmd” at  
99 [https://github.com/Uauy-Lab/GENIE3\\_scripts/](https://github.com/Uauy-Lab/GENIE3_scripts/).

### 100 **RNA-Seq analysis**

#### 101 *Mapping*

102 Publicly-available reads from [14] were downloaded from  
103 <https://www.ncbi.nlm.nih.gov/geo/query/acc.cgi?acc=GSE60635>. Reads from the wild-type and *nam-*  
104 *a1* (*gpc-a1*) mutant lines from 12 and 22 days after anthesis (DAA) were pseudoaligned with kallisto  
105 (v 0.43.1) [17] against the v1.1 annotation from the RefSeq genome v1.0 [1] using standard settings  
106 for single reads (--single -b 30 -l 200 -s 20) (Supplementary Table 1). Only the A and B genomes of  
107 RefSeqv1.0 were used for the pseudoalignment, as the raw reads were derived from tetraploid *cv.*  
108 Kronos plants.

#### 109 *Differential Expression Analysis*

110 Gene expression levels (transcript per million, TPM) were determined using the R package Sleuth  
111 [18] using the default settings for the Wald test (sleuth\_wt; v 0.30.0). We compared the expression of  
112 genes between the wild-type and *nam-a1* mutant samples at 12 and 22 DAA. We used the cut-off of  $q$   
113  $< 0.05$  to identify differentially expressed genes, where  $q$  is the  $p$ -value adjusted for false discovery  
114 rate using the Benjamini-Hochberg correction. The list of differentially expressed genes for each  
115 timepoint is reported in Supplementary Table 2.

#### 116 *Methods for ID conversion and comparison*

117 The genes and contigs identified as differentially expressed in the original [14] study were converted  
118 to RefSeqv1.1 gene models where possible using BLASTn [19]. Briefly, the differentially expressed  
119 sequences were extracted from the IWGSC CSS genome [20] and compared with BLASTn (v 2.2.3; -  
120 num\_alignments 1 -outfmt 6) against the RefSeq v1.1 transcriptome (including both high and low  
121 confidence gene models). The BLAST hit with the greatest percent identity to the original CSS  
122 sequence was assigned as the equivalent RefSeqv1.1 gene model. The scripts used for this analysis are  
123 found at [https://github.com/Uauy-Lab/GENIE3\\_scripts](https://github.com/Uauy-Lab/GENIE3_scripts), ExtractCDS\_fromPearceDEGs.py and  
124 BLAST\_Pearce\_cds\_against\_HC\_and\_LC.sh.

### 125 **Comparison of the Differentially Expressed Genes with GENIE3**

#### 126 *Calculation of Shared Ratios*

127 We calculated the level of overlap or shared genes between different transcription factors or datasets  
128 as follows:

$$129 \quad \frac{|A \cap B|}{|A|}$$

130 Where A and B are sets of genes, and  $|A| < |B|$ .

131 For example, given two sets of genes A and B, where A contains 5 genes and B contains 10 genes, if  
132 they share two genes in common the shared ratio is 2/5, or 0.4.

133 This calculation was carried out as implemented in R scripts available at [https://github.com/Uauy-Lab/GENIE3\\_scripts](https://github.com/Uauy-Lab/GENIE3_scripts). It was used to create the distribution of shared targets between transcription  
134 factors and the differentially expressed genes, as well as between the predicted targets of any two  
135 transcription factors.  
136

### 137 *Distributions of Shared Ratios*

138 Initially, we analysed the shared ratios between transcription factors in the GENIE3 network and the  
139 set of differentially expressed genes obtained from the re-analysed *NAM-A1* RNA-Seq data. The  
140 target genes of 1000 randomly selected transcription factors were compared against the differentially  
141 expressed genes at 12 and 22 DAA to obtain the distribution of shared ratios (Figure 1B). This  
142 calculation was also carried out individually for the targets of *NAM-A1* against both timepoints, as  
143 implemented in [https://github.com/Uauy-Lab/GENIE3\\_scripts/Genie3\\_Statistics\\_SharedRatios\\_RNASeqDEGs\\_Figure1.Rmd](https://github.com/Uauy-Lab/GENIE3_scripts/Genie3_Statistics_SharedRatios_RNASeqDEGs_Figure1.Rmd).

145 Following this, the shared ratio was calculated for 1000 randomly selected pairs of transcription  
146 factors from the GENIE3 network (implemented in [https://github.com/Uauy-Lab/GENIE3\\_scripts/Genie3\\_Statistics\\_SharedRatios\\_AllTFs\\_AllTFfamilies\\_Fig3\\_SuppFig2.Rmd](https://github.com/Uauy-Lab/GENIE3_scripts/Genie3_Statistics_SharedRatios_AllTFs_AllTFfamilies_Fig3_SuppFig2.Rmd)) (see Figure 3A). The  
147 same analysis was carried out for individual transcription factor super-families, based on the family  
148 assignments from [https://opendata.earlham.ac.uk/wheat/under\\_license/toronto/Ramirez-Gonzalez\\_etal\\_2018-06025-Transcriptome-Landscape/data/data\\_tables/transcription\\_factors\\_to\\_use\\_high\\_confidence.csv](https://opendata.earlham.ac.uk/wheat/under_license/toronto/Ramirez-Gonzalez_etal_2018-06025-Transcriptome-Landscape/data/data_tables/transcription_factors_to_use_high_confidence.csv) [2]. All pairs selected  
149 were unique, and where a transcription factor family was not large enough to contain 1000 unique  
150 pairs, the maximum number of unique pairs was sampled (e.g. in the family CCAAT\_HAP3, N=3 and  
151 thus the number of unique pairs sampled was 6). This calculation was also carried out for all  
152 homoeolog pairs, where triads were classified as in  
153 [https://opendata.earlham.ac.uk/wheat/under\\_license/toronto/Ramirez-Gonzalez\\_etal\\_2018-06025-Transcriptome-Landscape/data/TablesForExploration/Triads.rds](https://opendata.earlham.ac.uk/wheat/under_license/toronto/Ramirez-Gonzalez_etal_2018-06025-Transcriptome-Landscape/data/TablesForExploration/Triads.rds) [2]. The subset used for this analysis  
154 only included syntenic 1:1:1 triads (see [2] for definition), resulting in a total of 708 triads and 2,124  
155 individual genes. This was implemented in [https://github.com/Uauy-Lab/GENIE3\\_scripts/Genie3\\_Statistics\\_SharedRatios\\_Homoeologs\\_MovementCategories\\_Figure4\\_SuppFig3.Rmd](https://github.com/Uauy-Lab/GENIE3_scripts/Genie3_Statistics_SharedRatios_Homoeologs_MovementCategories_Figure4_SuppFig3.Rmd).

### 161 *Movement Ratios*

162 The shared ratios of homoeologous pairs were also distinguished by movement classifications, as  
163 defined previously [2]. In brief, triads were classified into three categories (“Dynamic”, “Middle 80”,  
164 and “Stable”) based on variation in their homoeolog expression bias across tissues. Dynamic triads  
165 show more variation in relative homoeolog expression levels across tissues than stable triads. The  
166 assignment of triads to each category is found here:

167 [https://opendata.earlham.ac.uk/wheat/under\\_license/toronto/Ramirez-Gonzalez\\_etal\\_2018-06025-Transcriptome-Landscape/data/Triad\\_Subsets\\_Movement/](https://opendata.earlham.ac.uk/wheat/under_license/toronto/Ramirez-Gonzalez_etal_2018-06025-Transcriptome-Landscape/data/Triad_Subsets_Movement/). Triads in the  
168 “HC\_CS\_no\_stress\_movement\_top\_10pc.txt” file were defined as Dynamic, the  
169 “HC\_CS\_no\_stress\_movement\_middle\_80pc.txt” as Mid 80, and the  
170

171 “HC\_CS\_no\_stress\_movement\_low\_10pc.txt” as Stable. This analysis was implemented in  
172 “Genie3\_Statistics\_SharedRatios\_Homoeologs\_MovementCategories\_Figure4\_SuppFig3.Rmd” at  
173 [https://github.com/Uauy-Lab/GENIE3\\_scripts](https://github.com/Uauy-Lab/GENIE3_scripts).

#### 174 ***Developmental Expression Datasets***

175 Public datasets were used for the expression analysis in Figure 2. The developmental time course was  
176 first published in [2], from the spring wheat cv. Azhurnaya. This dataset was included in the  
177 generation of the GENIE3 network. The senescence-specific time course was first published in [3],  
178 from the spring wheat cultivar Bobwhite, and was not included in the GENIE3 network.

#### 179 **Gene Ontology (GO) term analysis**

180 GO-term enrichment analysis was carried out as previously described in [3], using the GOSep (v  
181 1.34.1) package in R [21].

#### 182 **Data visualisation, manipulation, and statistical analyses.**

183 Graphs were made in R, principally using the ggplot2 (v 3.1.1)[22] and ggpubr (v 0.2)[23] packages  
184 as well as the “aheatmap” function of the NMF package (v 0.21.0)[24]. Networks in Figures 3B and C  
185 were visualised using Cytoscape (v 3.7.1) [25]. Data manipulation was also carried out in R, using the  
186 packages dplyr (v 0.8.0.1)[26] and tidyr (v 0.8.3)[27] in scripts as linked throughout the methods.  
187 Statistical analyses were carried out in R, as detailed in the results section. The sign test was carried  
188 out using the R package BSDA (v 1.2.0) [28].

189

## 190 **Results**

### 191 ***RNA-Seq analysis***

192 In 2014, Pearce *et al.* analysed the differences in gene expression between wild type (WT) Kronos, a  
193 tetraploid wheat cultivar, and a *NAM-A1* loss-of-function mutant (*nam-a1* or *gpc-a1*) which contained  
194 a premature stop codon (W114\*) [14]. Here, we reanalysed the RNA-Seq datasets for the wild-type  
195 and *nam-a1* single mutant lines at 12 and 22 DAA using the most recent wheat genome annotation  
196 [1]. Reads were pseudoaligned to the A and B genomes of the RefSeqv1.1 transcriptome using  
197 kallisto [17], a software which has been shown to differentiate well between homoeologs during  
198 alignment and is thus appropriate for use with polyploid wheat [2, 8]. Each sample contained on  
199 average 35 million reads, with the exception of one sample with 85 million reads, of which on average  
200 78% were aligned to the transcriptome (Supplementary Table 1).

201 To identify genes differentially expressed between the WT and *nam-a1* mutant at the two  
202 developmental timepoints (12 and 22 DAA) we used sleuth, a program designed for analysis of RNA-  
203 Seq experiments for which transcript abundances have been quantified with kallisto [18]. Using a  
204 relatively relaxed cut-off of  $q < 0.05$ , we identified 866 differentially expressed genes (DEGs)  
205 between WT and the *nam-a1* mutant at 12 DAA and 130 DEG at 22 DAA (Supplementary Table 2).  
206 This set of DEGs will be referred to as the *de novo* DEGs throughout the paper. We carried out gene  
207 ontology (GO) term enrichment analysis on the two sets of DEGs and found that DEGs at both  
208 timepoints are highly enriched for terms related to metal ion transport, including zinc, manganese, and  
209 copper ( $p < 0.001$ , adjusted for false discovery rate; Supplementary File 2). This correlates closely  
210 with the findings from the original analysis, which found that GO terms related to transporter function  
211 were highly regulated by *NAM-A1* [14]. This also supports previous physiological studies of the *NAM*  
212 genes which found them to be important in nutrient remobilisation and transport [15, 29].

213 We used BLASTn to compare the differentially expressed sequences from the Pearce dataset to the  
214 RefSeqv1.1 transcriptome annotation which was used for the *de novo* analysis [1]. We successfully  
215 assigned 453 out of 517 DEG identified by Pearce *et al.* to RefSeqv1.1 gene models (442/504 DEG at  
216 12 DAA and 11/13 DEG 22 DAA). Based on this common nomenclature, we then directly compared  
217 the *de novo* DEGs identified by sleuth with the DEGs identified originally [14]. At 12 DAA, 177 of  
218 the 442 DEGs (40%) were present in the *de novo* differential expression set, whereas at 22 DAA, 7 of  
219 the 11 DEGs (64%) were found in the *de novo* set.

220 At both developmental time points, our reanalysis identified more transcripts as significantly  
221 differential expressed compared to the original Pearce *et al.* study. This may be due to the more liberal  
222 significance cut off used ( $q < 0.05$ ) in the current analysis and/or the fact that a combination of four  
223 statistical tests were used to reduce false positive discoveries in the original study [14]. To determine  
224 the impact of the cut-off value on the calling of DEGs, we ranked the *de novo* DEGs by  $q$ -value and  
225 recorded the position of the 177 shared DEGs at 12 DAA. We found that the majority of shared DEGs  
226 (53%) ranked in the top quarter of the list of *de novo* DEGs (Supplementary Figure 1). However, 9%  
227 of the common DEGs were found in the bottom quarter of the *de novo* DEGs. This suggests that the  
228 cut-off value of  $q < 0.05$  was an appropriate level to maximise the identification of relevant DEGs.

### 229 ***The GENIE3 network predictions overlap with known DEGs***

230 To investigate whether the GENIE3 network provides biologically relevant information, we compared  
231 the GENIE3 predicted targets for *NAM-A1* against the list of differentially expressed genes identified  
232 between the wild-type and *nam-a1* mutants from the *de novo* RNA-Seq analysis. As the RNA-Seq  
233 experiment was carried out in tetraploid wheat, we only considered target genes on the A or B  
234 genome. We focussed on the 12 DAA and 22 DAA timepoints, which captured the onset and  
235 intermediate stages of senescence, respectively. At 12 DAA, we found that of the 79 genes predicted  
236 to be targets of *NAM-A1* in the GENIE3 network, 12 were shared with the set of *de novo* DEGs  
237 (15.2%; Figure 1A). However, at 22 DAA only 4 of the 79 GENIE3 predicted targets were shared  
238 with the DEGs (5.1%; Figure 1A). The decrease in overlap between 12 and 22 DAA is consistent with  
239 *NAM-A1* primarily acting early in senescence [14, 15].

240 We then compared the lists of DEGs at 12 and 22 DAA against the targets of all 3,384 transcription  
241 factors included in the GENIE3 dataset (Figure 1B). The median number of shared targets between  
242 the DEGs and predicted targets of a given transcription factor was 0, with a maximum of 33.3%.  
243 Comparing the overlap between random transcription factors and the RNA-Seq dataset, we found a  
244 significantly higher level of overlap between the GENIE3-predicted targets of *NAM-A1* and genes  
245 differentially expressed in the *nam-a1* mutant at both timepoints ( $p < 2.2e-16$ , Sign Test; Figure 1B).  
246 This result suggests that the GENIE3 network has value in directing focus towards targets with  
247 independent experimental support.

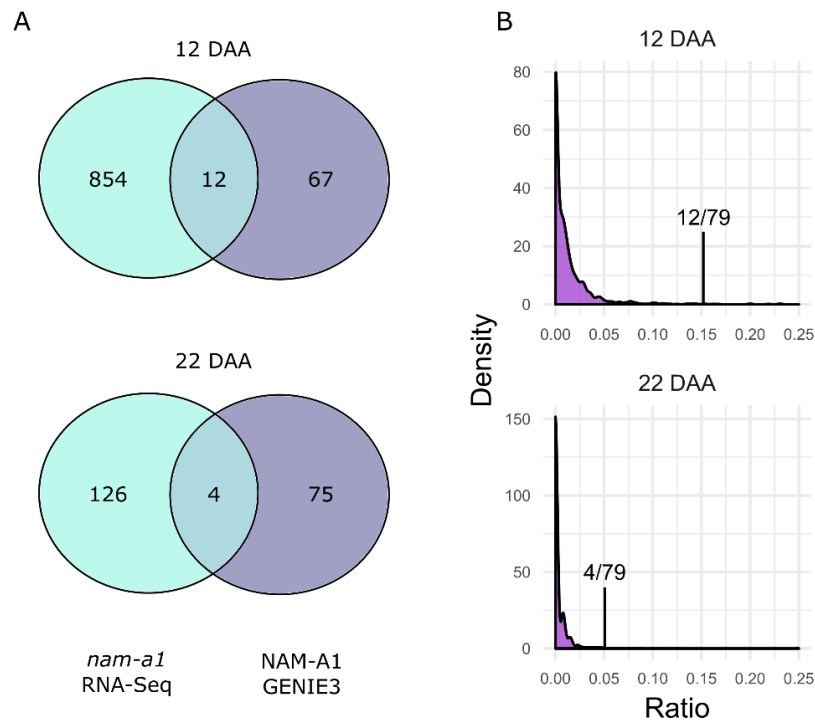

248

249 **Figure 1: GENIE3 predicts targets of NAM-A1 that overlap with genes differentially expressed in *nam-a1***

250 **mutants. (A) More overlapping genes are identified at 12 DAA (15.2% of the GENIE3 targets) than at 22 DAA**

251 **(5.1%). (B) Most transcription factors share very few predicted targets with the *nam-a1* differentially expressed**

252 **genes, with a distribution skewed strongly towards 0. At both time points, the predicted targets of NAM-A1**

253 **overlap significantly more with the *nam-a1* DEG than would be expected by chance (Sign Test,  $p < 0.001$ ).**

254 Note that the x-axis is capped at 0.25, to emphasize the skew of the distributions towards zero. “Ratio” refers to

255 the shared ratio of targets between the DEGs and the GENIE3 transcription factors.

### 256 ***Identification of senescence associated transcription factors***

257 We hypothesised that transcription factors which also share predicted targets with the *de novo* DEGs

258 may have roles in senescence. We therefore identified transcription factors that had a higher

259 percentage of shared targets with the *de novo* DEGs than *NAM-A1* itself (Figure 2C, Supplementary

260 Table 3). In total, we identified 20 such transcription factors, 0.6% of all transcription factors in the

261 network. Five transcription factors were identified through comparison to the 12 DAA DEGs, 11 with

262 the 22 DAA DEGs, and a further four which had a higher shared ratio at both time points. We

263 obtained expression data for all 20 of the transcription factors across a developmental time-course and

264 a senescence-specific time-course [2, 3]. A diverse range of transcription factor families were

265 represented, including four NACs, from the same family as *NAM-A1* (Supplementary Table 3). Only

266 one pair of homoeologs was identified, from the C2C2-CO-like family. Using the developmental

267 time-course, we calculated the fold-change in gene expression between non-senescent tissues and

268 senescing leaf tissues as previously described [3]. We found that 14 of the 20 genes showed an

269 increase in expression in the senescing tissues, four of which were enriched more than two-fold

270 (Figure 2A). Based on a published analysis of the senescence-specific time-course, six of the 20

271 transcription factors were identified as differentially regulated during flag leaf senescence in wheat

272 [3]. Analysis of the GENIE3 predicted targets for these 20 genes identified nine transcription factors

273 which shared at least one target gene with *NAM-A1* (Figure 2B).

274 To investigate the potential functions of these 20 transcription factors further, we identified GO terms

275 which were enriched in the GENIE3-predicted targets of these transcription factors (Supplementary

276 Table 3; Supplementary File 2). At 12 DAA, the targets of three of the nine transcription factors were

277 enriched for transporter-related GO terms, while others were enriched for senescence-related GO

278 terms such as catabolism, phosphatase activity, and chlorophyll biosynthesis. Of the transcription  
 279 factors identified at 22 DAA, GO terms related to transporters, senescence, circadian rhythms, and  
 280 stress responses were enriched in the GENIE3-predicted targets. By integrating the information from  
 281 the GENIE3 network with independent senescence-related expression data, we were able to identify a  
 282 robust set of candidate senescence-associated transcription factors to prioritise for functional  
 283 characterisation.

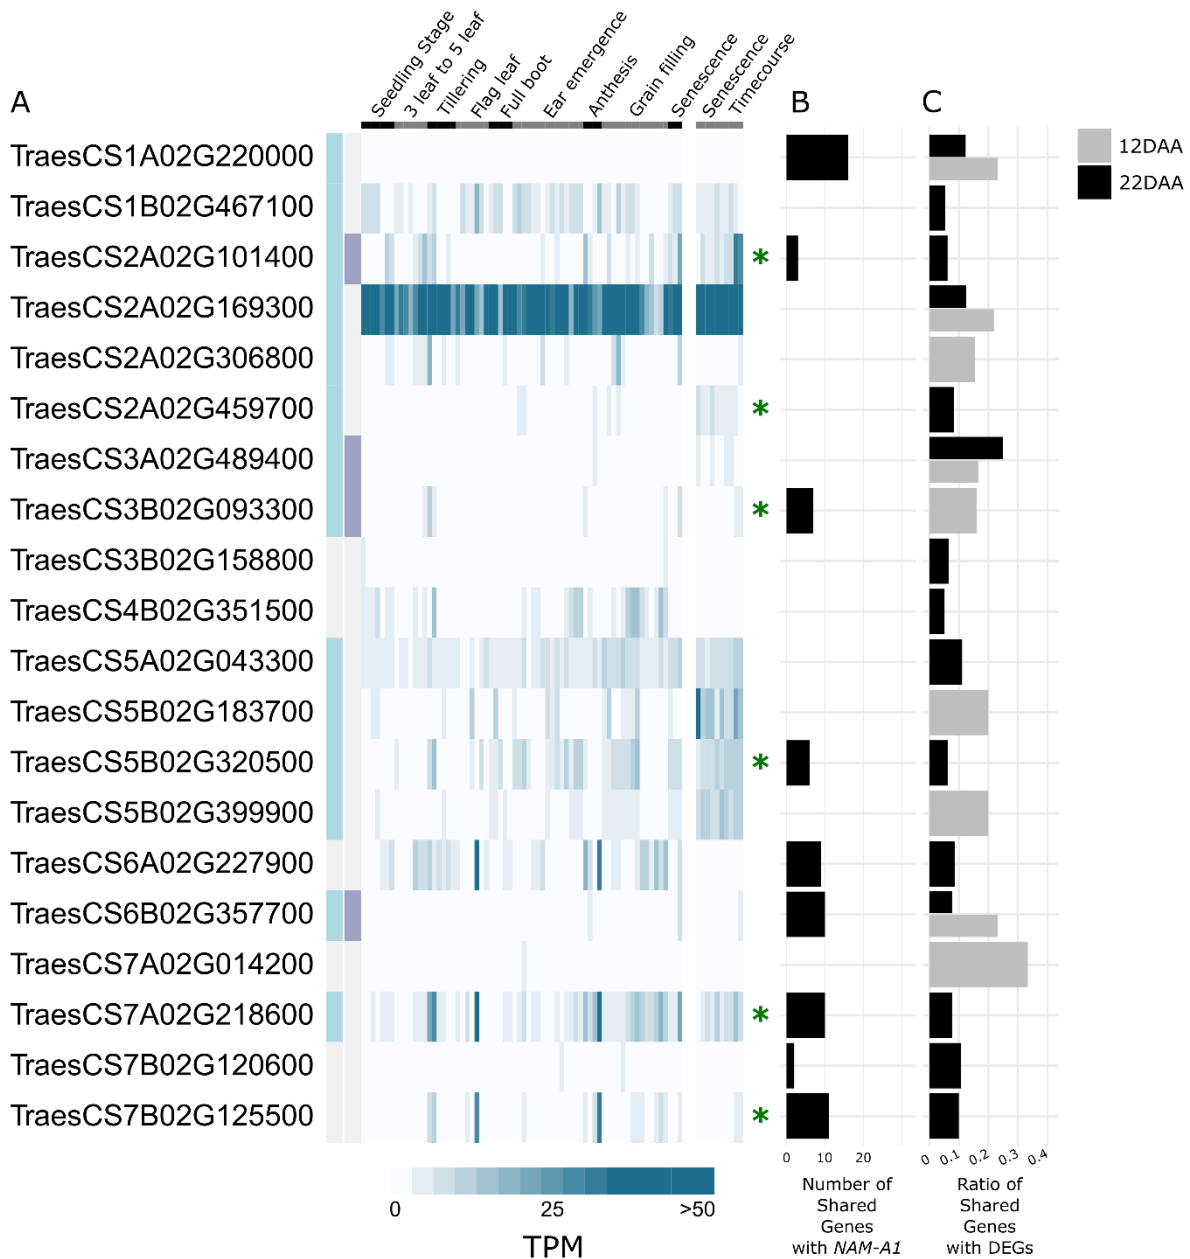

284  
 285 **Figure 2: Candidate senescence regulators.** Twenty transcription factors were identified which had a higher  
 286 shared ratio between the GENIE3-predicted targets and the RNA-Seq DEGs than *NAM-A1* itself. (A) Their  
 287 expression pattern is shown across a developmental time course [2] and a senescence-specific time course [3].  
 288 The TPM reported is averaged across three samples of the same tissue and timepoint from each dataset. Genes  
 289 upregulated in senescence are highlighted with a light blue box, and those with a greater than 2-fold increase are  
 290 highlighted with a purple box (left side). Genes present in the list of 341 candidate transcription factors based  
 291 on the senescence time course in Borrill *et al.* 2019 are indicated with a green asterisk [3]. (B) The number of  
 292 targets shared between the transcription factors and *NAM-A1*. (C) The shared ratio for each gene against the 12  
 293 DAA (grey) and 22 DAA (black) DEGs. Note that genes which had a higher shared ratio at both 12 and 22  
 294 DAA are shown with split bars.



295 ***Non-homoeologous transcription factors share few targets in the GENIE3 network.***

296 After establishing that the GENIE3 network can provide biologically-relevant predictions, we then  
297 turned to using the network to interrogate genome-wide patterns in transcription factor targets. We  
298 first investigated the extent to which transcription factors share the same targets. To do this, we  
299 carried out pairwise comparisons between randomly selected transcription factors and calculated the  
300 overlap between their targets. Following 1,000 iterations, we found that any two random transcription  
301 factors typically have no targets in common, with a median and 3<sup>rd</sup> quartile shared ratio of 0%. The  
302 distribution was highly positively skewed, as the vast majority of comparisons shared 0 targets  
303 (Figure 3A, B; Table 1). However, there was a long tail to the right of the graph, highlighting that in  
304 some cases, certain transcription factors do share a substantial portion of targets.

305 **Table 1: Summary statistics for the shared ratio distributions.**

| <i>Category</i>   | <i>Minimum</i> | <i>1<sup>st</sup><br/>Quartile</i> | <i>Median</i> | <i>Mean</i> | <i>3<sup>rd</sup><br/>Quartile</i> | <i>Maximum</i> | <i>Number of<br/>Comparisons</i> |
|-------------------|----------------|------------------------------------|---------------|-------------|------------------------------------|----------------|----------------------------------|
| <i>All TFs</i>    | 0              | 0                                  | 0             | 0.04        | 0                                  | 0.83           | 1,000                            |
| <i>NACs</i>       | 0              | 0                                  | 0             | 0.02        | 0                                  | 0.82           | 1,000                            |
| <i>C2C2_Dofs</i>  | 0              | 0                                  | 0             | 0.02        | 0                                  | 0.80           | 1,000                            |
| <i>Homoeologs</i> | 0              | 0.21                               | 0.41          | 0.40        | 0.59                               | 0.92           | 2,124                            |
| <i>Stable</i>     | 0              | 0.25                               | 0.43          | 0.41        | 0.57                               | 0.88           | 132                              |
| <i>Mid 80</i>     | 0              | 0.20                               | 0.39          | 0.39        | 0.57                               | 0.92           | 1,590                            |
| <i>Dynamic</i>    | 0              | 0.15                               | 0.36          | 0.35        | 0.53                               | 0.85           | 156                              |

306

307 The set of transcription factors in the GENIE3 network was then split into separate transcription factor  
308 super-families, as previously annotated [1]. The same analysis was performed within each  
309 transcription factor family, carrying out pairwise comparisons between transcription factor targets.  
310 We found that for the majority of transcription factor families, the distributions of shared targets were  
311 very similar to that found for the full set, as illustrated by the representative NAC and C2C2-Dof  
312 families (Figure 3A, Table 1; Supplementary Figure 2). Not all transcription factor families were large  
313 enough to support 1,000 unique pairwise comparisons, and in these cases the distribution clearly  
314 deviates from the whole (e.g. in CCAAT\_HAP3, N = 3).

315 Roughly 70% of wheat homoeolog triads (composed of A, B, and D genome copies) show balanced  
316 expression patterns, that is, similar relative abundance of transcripts from the three homoeologs across  
317 tissues [2]. We therefore hypothesized that homoeologs would be more likely to share predicted  
318 targets than randomly selected transcription factors, even within the same family. To test this, we  
319 randomly selected syntenic triads from the GENIE3 dataset, and calculated the percentage of shared  
320 genes for each of the three pairwise comparisons (A-B, A-D, B-D). This was carried out for the 708  
321 syntenic triads included in the network, a total of 2,124 pairwise comparisons, and showed that  
322 homoeologs are indeed more likely to share targets with each other than randomly selected triads are  
323 (Figure 3A, C, Table 1).

324

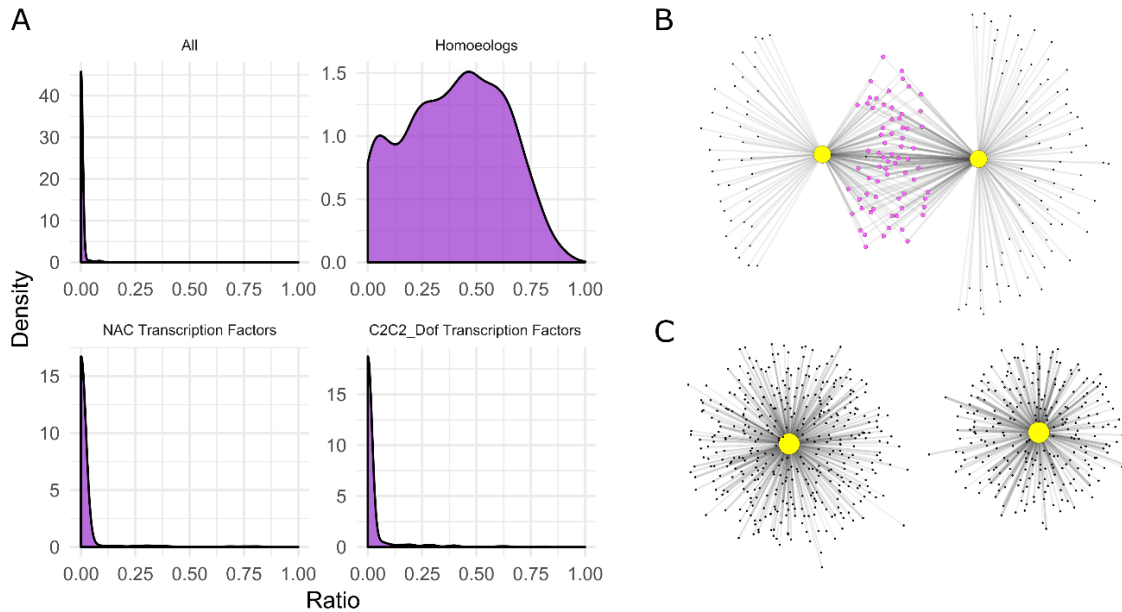

325

326 **Figure 3: Non-homoeologous transcription factors share few targets in the GENIE3 network. (A)**

327 Comparison of the shared targets of 1000 random transcription factor pairs found that the majority of  
328 transcription factors share few to no targets in common. This was also found to be the case within the majority of  
329 transcription factor families, showing here NAC and C2C2\_Dof transcription factors. However, pairs of  
330 homoeologous transcription factors shared many more targets in common, with a mean shared ratio of 39.7%.  
331 (B) An example of shared overlap between two homoeologous transcription factors, the NAC transcription  
332 factors *NAM-A1* (TraesCS6A01G108300) and *NAM-D1* (TraesCS6D01G096300) is shown, with the two  
333 homoeologs sharing 62% of possible targets. (C) The two randomly chosen transcription factors, in this case  
334 TraesCS1D01G436500 (Sigma 70-like family) and TraesCS4B01G383400 (HSF family), share no targets.

335 ***Dynamic triads share fewer targets than stable triads***

336 Wheat genome triads can be classified into different categories based on how the expression levels of  
337 the homoeologs varies across tissues [2]. So-called ‘dynamic’ triads represent the 10% of triads which  
338 show the highest variation in relative expression levels of the different homoeologs across tissues,  
339 while ‘stable’ triads represent the 10% of triads with the lowest variation. Dynamic triads are under  
340 more relaxed selection pressure and we hypothesised that they may represent the initial steps toward  
341 neo or sub-functionalization of wheat homoeologs [2]. This hypothesis would suggest that  
342 homoeologs in dynamic triads are more likely to have distinct functions, and thus may be less likely  
343 to share predicted targets. To test this, we compared the level of overlap between targets of  
344 homoeologous transcription factors in dynamic and stable triads, as well as the ‘Mid 80’ intermediate  
345 set. We found that the dynamic triads do indeed have significantly less overlap in targets than the  
346 stable triads ( $p < 0.05$ , Wilcox test; Figure 4A; Table 1), supporting the neo/sub-functionalization  
347 hypothesis.

348 We next examined whether the targets of a transcription factor may hold signatures of the  
349 evolutionary origin of that transcription factor. We hypothesized that a transcription factor is more  
350 likely to have targets that reside on the same genome as the transcription factor itself; *e.g.* GENIE3-  
351 predicted targets for an A genome transcription factor will be enriched for A genome targets  
352 compared to B and D genome targets. We found no significant association between the genome of  
353 origin of the transcription factor and the genomes of its targets (Figure 4B). Likewise, we found no  
354 significant association between transcription factor genome and target genome when triads were  
355 assigned into their respective movement categories. For example, an A genome transcription factor  
356 from a Dynamic triad had similar numbers of GENIE3-predicted targets from each of the three  
357 genomes. (Supplementary Figure 3).

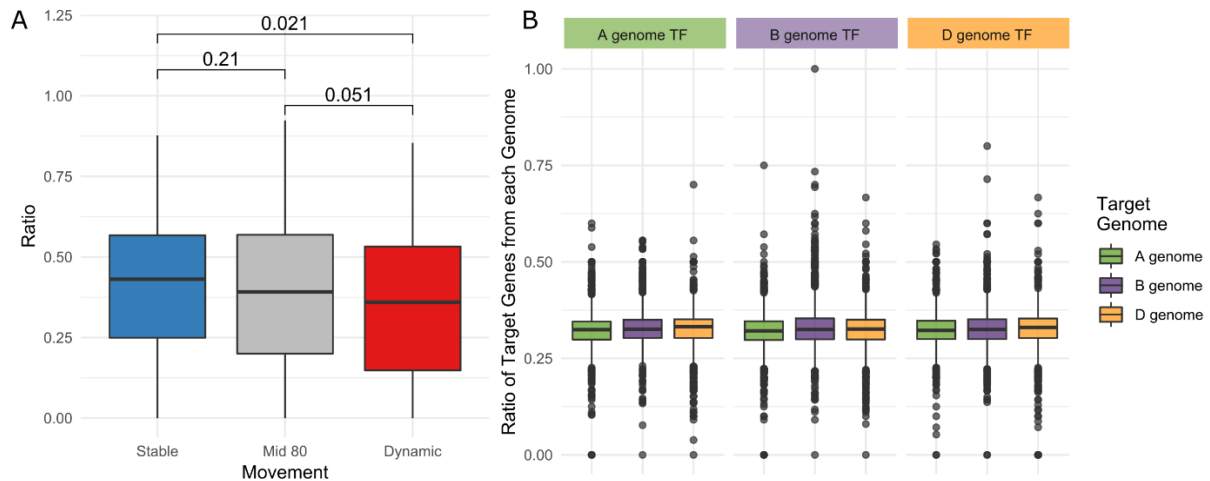

358

359 **Figure 4: The effect of relative homoeolog expression variation on shared ratios.** (A) There is a significant  
360 reduction in shared targets between homoeologs in dynamic triads compared to stable triads (Wilcoxon test,  $p =$   
361  $0.021$ ). There is a near-significant decrease between the Mid 80 subset and the Dynamic triads ( $p = 0.051$ ), and  
362 a slight non-significant decrease from Stable to Mid 80 triads ( $p = 0.21$ ). (B) We found no evidence that  
363 transcription factors from a specific genome were more or less likely to have targets from the same genome  
364 (Two-sample Kolmogorov Smirnov test, FDR adjusted).

#### 365 *GO-term enrichment of predicted targets suggests novel biological functions*

366 We next examined if we could use the GENIE3-predicted targets to gain a more general overview of  
367 functional trends within transcription factor families. Using the GO terms described in [2], we carried  
368 out a GO-term enrichment on the targets of individual transcription factor families (Supplementary  
369 File 2). To test the validity of this method, we first checked the predicted GO terms of the Heat Stress  
370 Factor (HSF) transcription factor family. Based on their known role in responding to heat and light  
371 stress [30], we expected to see GO terms highly enriched for heat and light stress responses. This was  
372 the case, suggesting that this approach can provide accurate insights into the large-scale functions of  
373 transcription factor families.

374 We then identified enriched GO terms for the remaining 56 transcription factor families. Some  
375 families were enriched for few or no GO terms, and we found that this was typically the case for  
376 families with few members. We restricted our analysis, therefore, to the 34 transcription factor  
377 families with at least 30 members. In many cases, enriched GO terms supported known functions of  
378 transcription factor families. For example, the MADS\_II family was enriched for, amongst other  
379 terms, floral organ identity (GO:0010093) which corresponds to their known role in flower patterning  
380 in wheat and other species [31]. The mTERF family was strongly enriched for chloroplast-related  
381 terms, corroborating their known role in organelle function [32, 33] while the WRKY family was  
382 highly enriched for stress-response GO terms [34-36].

383 Beyond the expected enriched GO terms, we also identified some cases where highly significantly  
384 enriched GO terms may point towards a previously unknown function within that transcription factor  
385 family. For example, one of the more highly enriched GO terms for the C2C2-Dof family is positive  
386 gravitropism (GO:0009958). This, combined with other GO terms related to amyloplasts and auxin  
387 responses, suggests that members of the C2C2-Dof family may play a role in regulating the  
388 gravitropic growth of roots [37]. We also see that the TUB family, of Tubby-like transcription factors,  
389 is highly enriched in cell-cycle related GO terms. This includes specific terms involved in microtubule  
390 movement and spindle formation (GO:0007018 and GO:0051225) as well as in regulation of cell  
391 cycle progression and transition (GO:0010389, GO:0051726 and GO:0000911). Plant TUB proteins

392 contain an F-box domain, suggesting they may function in tandem with other F-box-containing  
393 proteins, such as SCF E3 ubiquitin ligases, which also regulate the cell cycle in plants [38].

#### 394 ***The GENIE3 network is accessible through KnetMiner***

395 We have made the GENIE3 network available in the KnetMiner discovery platform for wheat  
396 (<https://knetminer.rothamsted.ac.uk/>) [39]. The top one million TF-target predictions were integrated  
397 onto the wheat genome-scale knowledge graph [16] as directed relations between genes (A regulates  
398 B). The interaction weight for each predicted relationship was also included in the network, where  
399 larger weights correspond to more strongly supported relationships. The data is accessible in  
400 conjunction with other information types (e.g. protein-protein interactions, literature co-occurrence,  
401 ontologies, homology, etc.) and can be searched through the KnetMiner web-app or web-services.

402 KnetMiner can be searched using keywords, genes or genomic regions to identify connections  
403 between genes and hidden links to complex traits. Searching for “NAM-A1” returns two hits,  
404 TRAESCS6A02G108300 and TRAESCS6D02G096300, which correspond to *NAM-A1* and its D-  
405 genome homoeolog *NAM-D1*, respectively. Using the KnetMiner network, we can visualise the  
406 relationships between *NAM-A1* and *NAM-D1*, seeing, for example, that they target each other in the  
407 GENIE3 network (Figure 5). Associated traits are also included in the network, linking *NAM-A1* and  
408 *NAM-D1* to “Grain Protein Content” (Figure 5). Links to orthologous genes in other species are also  
409 included in the network, such as the *Arabidopsis thaliana* orthologue *ANAC018* (Figure 5).

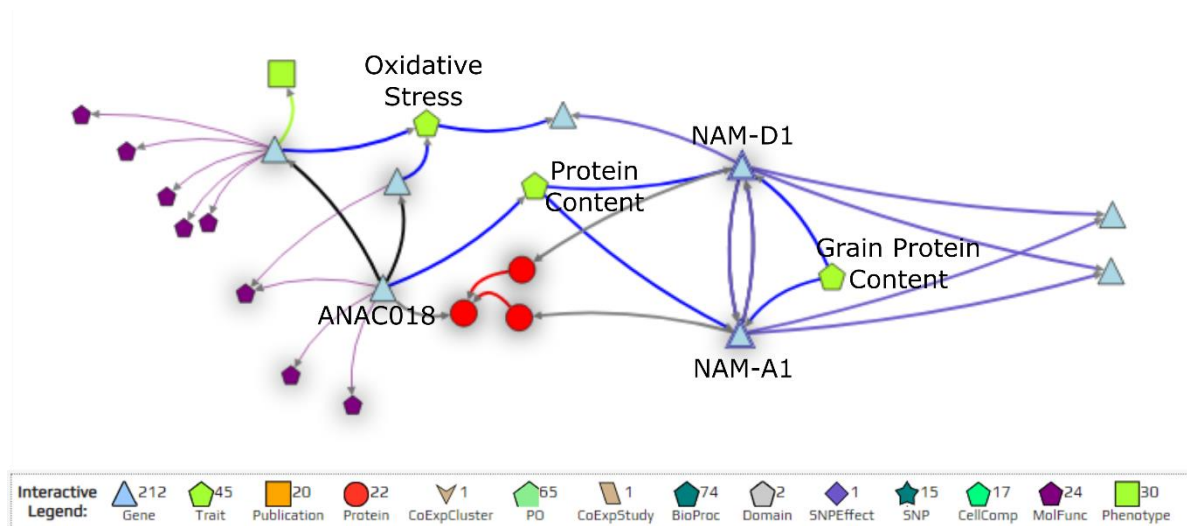

410

411 **Figure 5: The KnetMiner network depicts connections with *NAM-A1*.** The wheat transcription factors *NAM-*  
412 *A1* and its homoeolog *NAM-D1* target each other in the GENIE3 network (purple arrows) and share some target  
413 genes (blue triangles) in common. The network also identifies traits associated to genes (green pentagons), such  
414 as “Protein Content” for *NAM-A1*, *NAM-D1*, and the *A. thaliana* orthologue *ANAC018*. The legend below the  
415 network describes the meaning of each shape in the network. Not all connections present in the KnetMiner  
416 network are depicted in the figure; only a subset are shown for clarity.

417

## 418 **Discussion**

419 Here we have shown that a GENIE3 network provides biologically-informative predictions of targets  
420 for transcription factors in polyploid wheat. We have used the network in conjunction with  
421 independent RNA-Seq datasets to identify a set of candidate senescence regulators. We have also  
422 shown the value of the network to analyse genome-wide patterns of homoeologous transcription  
423 factors and transcription factor families.

424 ***Re-analysis of an RNA-Seq dataset identifies a high-quality set of differentially expressed genes.***

425 In our analysis of the GENIE3 network, we used a previously published RNA-Seq dataset to validate  
426 its ability to predict the targets of a well characterised transcription factor, *NAM-A1* [15]. In doing so,  
427 we needed to re-align the raw RNA-Seq reads to the most current transcriptome, RefSeqv1.1 [1].  
428 After carrying out *de novo* pseudoalignment and differential expression analysis, we obtained a larger  
429 set of differentially expressed genes between the wild-type and mutant *nam-a1* lines than the original  
430 study [14]. In part, this is likely due to the less strict cut-off used in our study ( $q < 0.05$ ). In the  
431 original study [14], a combination of four statistical tests were used to reduce the number false  
432 positive discoveries. However, as our intention was not to reduce the rate of false positives, but rather  
433 that of false-negatives or incorrectly removed genes, we used a less stringent cut-off, based solely on  
434 adjusting the original  $q$ -values for false discovery rate. We found that the DEGs identified in Pearce *et*  
435 *al.* [14] were found throughout the *de novo* list of DEGs, suggesting that the cut off chosen was not  
436 overly generous (Supplementary Figure 1). We also closely recapitulated their findings in that our *de*  
437 *nov*o DEGs were highly enriched for metal ion transport-related GO terms, indicating that the *de novo*  
438 DEGs are consistent with *NAM-A1* function. These enrichment results also corroborate our  
439 understanding of *NAM-A1* as a critical regulator of nutrient remobilisation during senescence.

440 ***The GENIE3 network provides biologically relevant transcription factor - target relationships.***

441 Gene networks are increasingly used in plant genetics research as a way to establish relationships  
442 across large gene sets and for hypothesis-generation. Initial assessment of the biological relevance of  
443 these gene networks often rely on enrichment analyses using GO terms. These methods are useful in  
444 identifying trends within large gene sets, as we found when carrying out GO term enrichment of  
445 transcription factor families. The targets of families with known functions, such as the Heat Stress  
446 Factors, were enriched for the expected GO terms [30]. However, these enrichment analyses are  
447 limited by the information that is used to develop the GO terms themselves. Very few GO term  
448 annotations are supported by experimental evidence even in model species such as *Arabidopsis*  
449 *thaliana* [40]. GO terms associated to the RefSeqv1.0 transcriptome were based primarily on  
450 automated annotation and orthologues in other plant species, with over 96% of the GO terms assigned  
451 to genes based on inference from sequence orthology (ISO) [1]. As a result, while enrichment  
452 analyses with GO terms can provide useful information particularly with large-scale datasets, they  
453 must be combined with external data to validate their predictions.

454 As a result, while the GO term enrichment analyses suggested that the network produced biologically  
455 relevant results, validation of the network required the use of experimentally-derived data. By using  
456 independent RNA-Seq datasets, which were not used in the creation of the GENIE3 network, we were  
457 able to show that the predictions made by the *in silico* network hold up under comparison to *in vivo*  
458 datasets. It is important to note, however, that the overlap between the predicted targets of *NAM-A1*  
459 and the differentially expressed genes from the RNA-Seq data is far from complete. At 12 DAA, the  
460 timepoint where *NAM-A1* is thought to first start exerting its effect, only 12 genes are shared out of 79  
461 predicted genes and 866 differentially expressed genes. While this gives a shared ratio of  
462 approximately 15%, significantly higher than that expected by chance, the GENIE3 network and the  
463 differentially expressed genes do not contain identical targets. However, based on the differences in  
464 the datasets used, it is likely that a large portion of this discrepancy is due to the fact that the GENIE3  
465 network was derived from 850 distinct RNA-Seq samples, spanning different tissues, ages, stresses,  
466 and varieties, while the RNA-Seq dataset came from single timepoints taken from flag leaf tissue [1,  
467 14]. While *NAM-A1* is expressed in the flag leaf during senescence, it is also expressed in the  
468 peduncle during senescence [2, 8], and at lower levels in various leaf, stem, and even spike tissues  
469 during development (Supplementary Figure 4). It's possible that many, if not most, of the predicted  
470 targets from the GENIE3 network may be regulated or influenced in some way by *NAM-A1*, but not in  
471 the flag leaf and at the precise 12 DAA and 22 DAA timepoints captured in the independent RNA-Seq  
472 data.

473 ***The GENIE3 network can be used for hypothesis generation with large gene sets.***

474 The fact that any two random transcription factors share, on average, zero targets in common in the  
475 GENIE3 network highlights that the network is not overwhelmed by spurious connections between  
476 transcription factors and biologically irrelevant targets. The network is also not so conservative that  
477 transcription factors with similar functions share no targets in common, as is made clear by the more  
478 normally-distributed homoeologs (Figure 3A). Nevertheless, as most transcription factors do not share  
479 targets, this suggests that the original cut-off chosen for the network (1,000,000 connections) was  
480 appropriately stringent to avoid noisy, low-confidence connections.

481 The presence of overlapping targets between transcription factors suggests that the transcription  
482 factors may be acting in similar pathways. However, it is important to recognise the limitations of the  
483 network, in particular that predicted targets of a transcription factor are not necessarily true targets.  
484 Therefore, integrating the GENIE3 network with other sources of regulatory information, such as  
485 RNA-Seq datasets as demonstrated here, can provide cumulative evidence towards new hypotheses  
486 and candidate genes. By combining the DEGs obtained from a *nam-a1* mutant line and the GENIE3  
487 network, we have produced a set of candidate transcription factors which may act in the same or  
488 similar pathways as *NAM-A1*. We have then compared these candidates with an independent  
489 senescence time-course [3], highlighting six candidate genes which were identified through both  
490 methods and are good candidates for further exploration. Moving forwards, information generated  
491 from networks such as the GENIE3 will need to be validated functionally and *in planta*. Recently,  
492 *NAM-A2*, a previously uncharacterised member of the *NAM* family of transcription factors, was  
493 predicted to be involved in senescence based on expression and network data [3]. The function of this  
494 transcription factor was then validated using independent mutant TILLING lines [41] demonstrating  
495 the ability of the networks to predict biologically-relevant candidates.

496 ***Homoeolog expression variation in dynamic triads may be indicative of functional divergence.***

497 Previous work showed that triads of homoeologs can display variable patterns of genome dominance  
498 across different tissues [2]. Triads with the most variable relative homoeolog expression patterns,  
499 ‘Dynamic’ triads, were also found to have higher Ka/Ks values, suggesting they were under reduced  
500 selection pressure. It was proposed that the variation in relative expression patterns across tissues  
501 arises as a result of this relaxed selection pressure, facilitating both neo- and sub-functionalisation  
502 following polyploidy. We found that dynamic triads were less likely to share GENIE3 targets in  
503 common than stable triads, supporting the hypothesis that dynamic triads are in the process of  
504 diverging functionally (Figure 4B). However, we found no correlation between the genome of origin  
505 of the transcription factor and the target genomes in dynamic triads (Supplementary Figure 3).

506 At what stage, then, did the targets of homoeologs in dynamic triads begin to diverge? These results  
507 may suggest that the variation in expression seen between the homoeologs arose following  
508 polyploidisation, as there is no bias towards the genome of origin. However, we do not know enough  
509 about the behaviour of transcription factors following polyploidisation to draw clear conclusions. For  
510 example, we do not know to what extent transcription factors gain the ability to regulate  
511 homoeologous genes on other genomes after hybridisation. The application of methods such as ChIP-  
512 Seq [42], DAP-Seq [43], and large-scale yeast two-hybrid interaction screens [44] to transcription  
513 factors in diploid and polyploid wheat will provide experimental data on homoeologous transcription  
514 factor interactions and binding preferences. Until these datasets become available it is premature to  
515 draw conclusions on the evolutionary origins of transcription factor homoeolog functional divergence.  
516 Nevertheless, genome-wide analyses of datasets such as the GENIE3 network and the expression  
517 datasets on expVIP have pointed to the dynamic triads as a source of genetic functional variation [2,  
518 8].

519

## 520 **Conclusions**

521 Using publicly available datasets, we have shown that the wheat GENIE3 network provides  
522 biologically-relevant information that can be used to guide hypothesis generation in wheat. The utility  
523 of the network lies particularly in enrichment analyses of larger gene sets and in integration with other  
524 datasets, such as independent RNA-Seq experiments, for candidate gene selection. New germplasm  
525 resources in wheat, such as the *in silico* TILLING resource [41], can be rapidly leveraged for  
526 functional characterisation of candidate genes *in planta*. Transgenic approaches such as CRISPR [45]  
527 and virus-induced gene silencing (VIGS) [46] can now be used in wheat to validate gene function.  
528 The GENIE3 network can be accessed through the KnetMiner web application and using R scripts  
529 available from [https://github.com/Uauy-Lab/GENIE3\\_scripts](https://github.com/Uauy-Lab/GENIE3_scripts). We predict that gene regulatory  
530 networks such as GENIE3 will play an increasingly important role in wheat genetics as more  
531 transcriptomic datasets become publicly available.

532

## 533 **Acknowledgements**

534 We would like to acknowledge A. Braeutigam (Bielefeld University) for her useful comments during  
535 the development of the manuscript, and for her work developing the GENIE3 network.

## 536 **Author Contributions**

537 SAH and CU conceived the study; SAH and AB carried out the RNA-Seq analysis and validation;  
538 SAH carried out the genome-wide analyses of the network; AS and KH-P integrated the GENIE3  
539 dataset into KnetMiner; SAH wrote the manuscript, with contributions from CU, AB and KH-P. All  
540 authors have read and approved the final manuscript.

## 541 **Funding**

542 This work was supported by the UK Biotechnology and Biological Sciences Research Council  
543 (BBSRC) through the Designing Future Wheat (BB/P016855/1) and GEN 710 (BB/P013511/1) ISPs.  
544 SAH and AB were funded by the John Innes Foundation.

## 545 **Data Availability**

546 All scripts used for analysis in this paper are available on Github at [https://github.com/Uauy-](https://github.com/Uauy-Lab/GENIE3_scripts)  
547 [Lab/GENIE3\\_scripts](https://github.com/Uauy-Lab/GENIE3_scripts). Links to the public datasets used in the analysis are included within the  
548 Materials and Methods, where appropriate, or are linked in the scripts on Github. In general, datasets  
549 from the Ramírez-González *et al.* 2018 paper are available at  
550 [https://opendata.earlham.ac.uk/wheat/under\\_license/toronto/Ramirez-Gonzalez\\_et\\_al\\_2018-06025-](https://opendata.earlham.ac.uk/wheat/under_license/toronto/Ramirez-Gonzalez_et_al_2018-06025-Transcriptome-Landscape/)  
551 [Transcriptome-Landscape/](https://opendata.earlham.ac.uk/wheat/under_license/toronto/Ramirez-Gonzalez_et_al_2018-06025-Transcriptome-Landscape/). The original GENIE3 network is deposited at  
552 <https://doi.org/10.5447/ipk/2018/7>.

## 553 **Supplementary Files**

554 Supplementary Table 1: Kallisto mapping statistics.  
555 Supplementary Table 2: List of *de novo* differentially-expressed genes.  
556 Supplementary Table 3: List of candidate senescence regulators, as shown in Figure 2.  
557 Supplementary File 1: Contains Supplementary Figures 1-4.  
558 Supplementary File 2: Contains the enriched GO terms for the GENIE3 targets of all transcription  
559 factor families and of the candidate senescence regulators (Supplementary Table 3). See README  
560 file in folder for further details.

561

## 562 References

- 563 1. Appels R, Eversole K, Stein N, Feuillet C, Keller B, Rogers J, Pozniak CJ, Choulet F,  
564 Distelfeld A, Poland J *et al*: **Shifting the limits in wheat research and breeding using a**  
565 **fully annotated reference genome**. *Science* 2018, **361**(6403):eaar7191.
- 566 2. Ramírez-González RH, Borrill P, Lang D, Harrington SA, Brinton J, Venturini L, Davey M,  
567 Jacobs J, van Ex F, Pasha A *et al*: **The transcriptional landscape of polyploid wheat**.  
568 *Science* 2018, **361**(6403):eaar6089.
- 569 3. Borrill P, Harrington SA, Simmonds J, Uauy C: **Identification of transcription factors**  
570 **regulating senescence in wheat through gene regulatory network modelling**. *Plant*  
571 *Physiology* 2019:pp.00380.02019.
- 572 4. Pfeifer M, Kugler KG, Sandve SR, Zhan B, Rudi H, Hvidsten TR, Mayer KFX, Olsen O-A:  
573 **Genome interplay in the grain transcriptome of hexaploid bread wheat**. *Science* 2014,  
574 **345**(6194):1250091.
- 575 5. Chi Q, Guo L, Ma M, Zhang L, Mao H, Wu B, Liu X, Ramirez-Gonzalez RH, Uauy C,  
576 Appels R *et al*: **Global transcriptome analysis uncovers the gene co-expression regulation**  
577 **network and key genes involved in grain development of wheat (*Triticum aestivum* L.)**.  
578 *Functional & Integrative Genomics* 2019.
- 579 6. Schilling M, Pfeifer AC, Bohl S, Klingmüller U: **Standardizing experimental protocols**.  
580 *Current Opinion in Biotechnology* 2008, **19**(4):354-359.
- 581 7. Endrullat C, Glökler J, Franke P, Frohme M: **Standardization and quality management in**  
582 **next-generation sequencing**. *Applied & Translational Genomics* 2016, **10**:2-9.
- 583 8. Borrill P, Ramirez-Gonzalez R, Uauy C: **expVIP: a Customizable RNA-seq Data Analysis**  
584 **and Visualization Platform**. *Plant Physiology* 2016, **170**(4):2172.
- 585 9. Huynh-Thu VA, Irrthum A, Wehenkel L, Geurts P: **Inferring Regulatory Networks from**  
586 **Expression Data Using Tree-Based Methods**. *PLOS ONE* 2010, **5**(9):e12776.
- 587 10. Huang J, Zheng J, Yuan H, McGinnis K: **Distinct tissue-specific transcriptional regulation**  
588 **revealed by gene regulatory networks in maize**. *BMC Plant Biology* 2018, **18**(1):111.
- 589 11. Chen X, Wang Q-L, Zhang M-H: **Identifying key genes in glaucoma based on a**  
590 **benchmarked dataset and the gene regulatory network**. *Experimental and Therapeutic*  
591 *Medicine* 2017, **14**:3651-3657.
- 592 12. Marchand G, Huynh-Thu VA, Kane NC, Arribat S, Varès D, Rengel D, Balzergue S,  
593 Rieseberg LH, Vincourt P, Geurts P *et al*: **Bridging physiological and evolutionary time-**  
594 **scales in a gene regulatory network**. *New Phytologist* 2014, **203**(2):685-696.
- 595 13. Walley JW, Sartor RC, Shen Z, Schmitz RJ, Wu KJ, Urich MA, Nery JR, Smith LG,  
596 Schnable JC, Ecker JR *et al*: **Integration of omic networks in a developmental atlas of**  
597 **maize**. *Science* 2016, **353**(6301):814.
- 598 14. Pearce S, Tabbita F, Cantu D, Buffalo V, Avni R, Vazquez-Gross H, Zhao R, Conley CJ,  
599 Distelfeld A, Dubcovsky J: **Regulation of Zn and Fe transporters by the GPC1 gene**  
600 **during early wheat monocarpic senescence**. *BMC Plant Biology* 2014, **14**(1):368.
- 601 15. Uauy C, Distelfeld A, Fahima T, Blechl A, Dubcovsky J: **A NAC Gene regulating**  
602 **senescence improves grain protein, zinc, and iron content in wheat**. *Science* 2006,  
603 **314**(5803):1298-1301.
- 604 16. Hassani-Pak K, Castellote M, Esch M, Hindle M, Lysenko A, Taubert J, Rawlings C:  
605 **Developing integrated crop knowledge networks to advance candidate gene discovery**.  
606 *Applied & Translational Genomics* 2016, **11**:18-26.
- 607 17. Bray NL, Pimentel H, Melsted P, Pachter L: **Near-optimal probabilistic RNA-seq**  
608 **quantification**. *Nature Biotechnology* 2016, **34**:525.
- 609 18. Pimentel H, Bray NL, Puente S, Melsted P, Pachter L: **Differential analysis of RNA-seq**  
610 **incorporating quantification uncertainty**. *Nature Methods* 2017, **14**:687.
- 611 19. Altschul SF, Gish W, Miller W, Myers EW, Lipman DJ: **Basic local alignment search tool**.  
612 *Journal of Molecular Biology* 1990, **215**(3):403-410.
- 613 20. IWGSC: **A chromosome-based draft sequence of the hexaploid bread wheat (*Triticum***  
614 ***aestivum*) genome**. *Science* 2014, **345**(6194):1251788.



- 615 21. Young MD, Wakefield MJ, Smyth GK, Oshlack A: **Gene ontology analysis for RNA-seq:**  
616 **accounting for selection bias.** *Genome Biology* 2010, **11**(2):R14.
- 617 22. Wickham H: **ggplot2: Elegant Graphics for Data Analysis.** New York: Springer-Verlag;  
618 2016.
- 619 23. **ggpubr: 'ggplot2' Based Publication Ready Plots.** [[https://CRAN.R-](https://CRAN.R-project.org/package=ggpubr)  
620 [project.org/package=ggpubr](https://CRAN.R-project.org/package=ggpubr)]
- 621 24. Gaujoux R, Seoighe C: **A flexible R package for nonnegative matrix factorization.** *BMC*  
622 *Bioinformatics* 2010, **11**(1):367.
- 623 25. Shannon P, Markiel A, Ozier O, Baliga NS, Wang JT, Ramage D, Amin N, Schwikowski B,  
624 Ideker T: **Cytoscape: a software environment for integrated models of biomolecular**  
625 **interaction networks.** *Genome research* 2003, **13**(11):2498-2504.
- 626 26. Wickham H, François R, Henry L, Müller K: **dplyr: A Grammar of Data Manipulation.** In:  
627 *R package version 0801* 2019.
- 628 27. Wickham H, Henry L: **tidyr: Easily Tidy Data with 'spread()' and 'gather()' Functions.**  
629 In: *R package version 082.* 2018.
- 630 28. **BSDA: Basic Statistics and Data Analysis.** [<https://CRAN.R-project.org/package=BSDA>]
- 631 29. Waters BM, Uauy C, Dubcovsky J, Grusak MA: **Wheat (Triticum aestivum) NAM proteins**  
632 **regulate the translocation of iron, zinc, and nitrogen compounds from vegetative tissues**  
633 **to grain.** *Journal of Experimental Botany* 2009, **60**(15):4263-4274.
- 634 30. Kotak S, Larkindale J, Lee U, von Koskull-Döring P, Vierling E, Scharf K-D: **Complexity of**  
635 **the heat stress response in plants.** *Current Opinion in Plant Biology* 2007, **10**(3):310-316.
- 636 31. Ng M, Yanofsky MF: **Function and evolution of the plant MADS-box gene family.** *Nature*  
637 *Reviews Genetics* 2001, **2**(3):186-195.
- 638 32. Kleine T: **Arabidopsis thaliana mTERF proteins: evolution and functional classification.**  
639 *Front Plant Sci* 2012, **3**:233-233.
- 640 33. Quesada V: **The roles of mitochondrial transcription termination factors (MTERFs) in**  
641 **plants.** *Physiologia plantarum* 2016, **157**(3):389-399.
- 642 34. Rushton PJ, Somssich IE, Ringler P, Shen QJ: **WRKY transcription factors.** *Trends in Plant*  
643 *Science* 2010, **15**(5):247-258.
- 644 35. Jiang J, Ma S, Ye N, Jiang M, Cao J, Zhang J: **WRKY transcription factors in plant**  
645 **responses to stresses.** *Journal of Integrative Plant Biology* 2017, **59**(2):86-101.
- 646 36. Phukan UJ, Jeena GS, Shukla RK: **WRKY Transcription Factors: Molecular Regulation**  
647 **and Stress Responses in Plants.** *Front Plant Sci* 2016, **7**(760).
- 648 37. Su S-H, Gibbs NM, Jancewicz AL, Masson PH: **Molecular Mechanisms of Root**  
649 **Gravitropism.** *Current Biology* 2017, **27**(17):R964-R972.
- 650 38. Gusti A, Baumberger N, Nowack M, Pusch S, Eisler H, Potuschak T, De Veylder L,  
651 Schnittger A, Genschik P: **The Arabidopsis thaliana F-Box Protein FBL17 Is Essential for**  
652 **Progression through the Second Mitosis during Pollen Development.** *PLOS ONE* 2009,  
653 **4**(3):e4780.
- 654 39. Hassani-Pak K: **KnetMiner - An integrated data platform for gene mining and biological**  
655 **knowledge discovery.** Universität Bielefeld; 2017.
- 656 40. Rhee SY, Mutwil M: **Towards revealing the functions of all genes in plants.** *Trends in*  
657 *Plant Science* 2014, **19**(4):212-221.
- 658 41. Krasileva KV, Vasquez-Gross HA, Howell T, Bailey P, Paraiso F, Clissold L, Simmonds J,  
659 Ramirez-Gonzalez RH, Wang X, Borrill P *et al*: **Uncovering hidden variation in polyploid**  
660 **wheat.** *Proceedings of the National Academy of Sciences* 2017, **114**(6):E913.
- 661 42. Park PJ: **ChIP-seq: advantages and challenges of a maturing technology.** *Nature Reviews*  
662 *Genetics* 2009, **10**:669.
- 663 43. Bartlett A, O'Malley RC, Huang S-sC, Galli M, Nery JR, Gallavotti A, Ecker JR: **Mapping**  
664 **genome-wide transcription-factor binding sites using DAP-seq.** *Nature Protocols* 2017,  
665 **12**:1659.
- 666 44. Brückner A, Polge C, Lentze N, Auerbach D, Schlattner U: **Yeast two-hybrid, a powerful**  
667 **tool for systems biology.** *Int J Mol Sci* 2009, **10**(6):2763-2788.

- 668 45. Rey M-D, Martín AC, Smedley M, Hayta S, Harwood W, Shaw P, Moore G: **Magnesium**  
669 **Increases Homoeologous Crossover Frequency During Meiosis in ZIP4 (Ph1 Gene)**  
670 **Mutant Wheat-Wild Relative Hybrids.** *Front Plant Sci* 2018, **9**:509-509.
- 671 46. Lee W-S, Hammond-Kosack KE, Kanyuka K: **Barley Stripe Mosaic Virus-Mediated Tools**  
672 **for Investigating Gene Function in Cereal Plants and Their Pathogens: Virus-Induced**  
673 **Gene Silencing, Host-Mediated Gene Silencing, and Virus-Mediated Overexpression of**  
674 **Heterologous Protein.** *Plant Physiology* 2012, **160**(2):582.
- 675

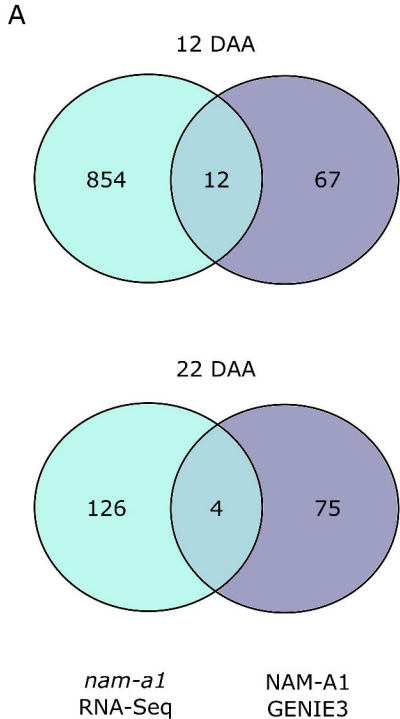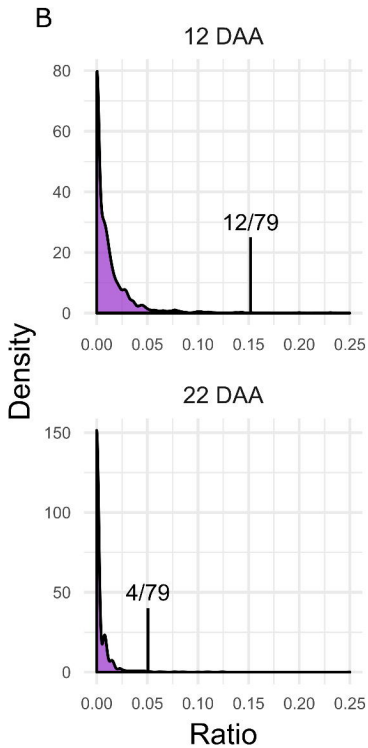

A

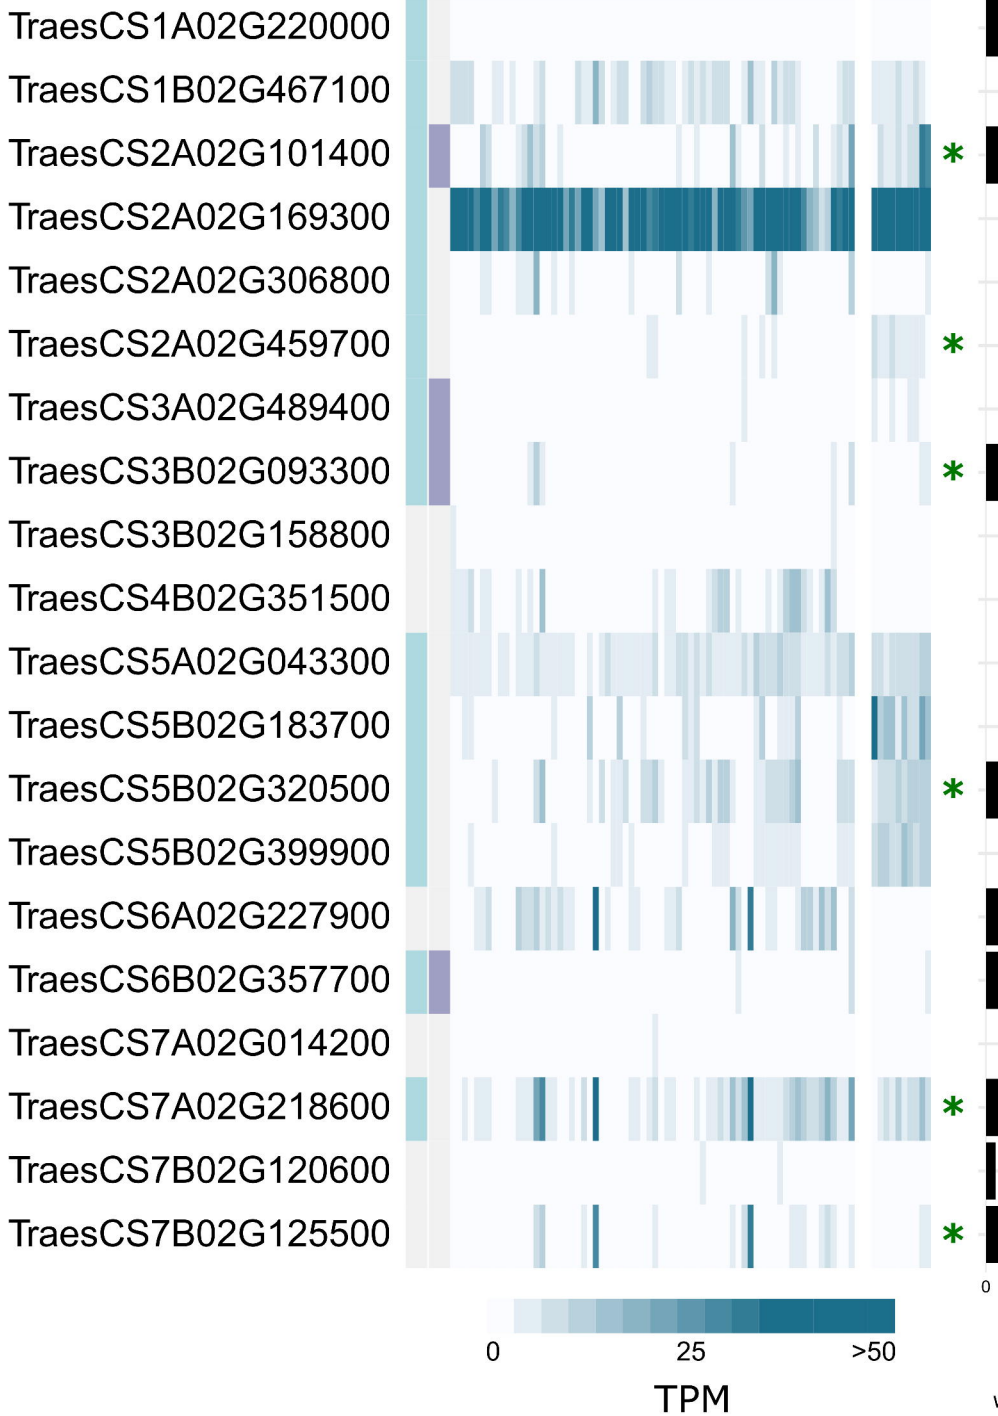

B

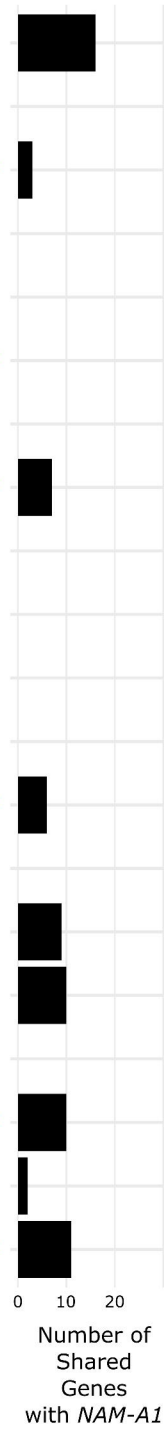

C

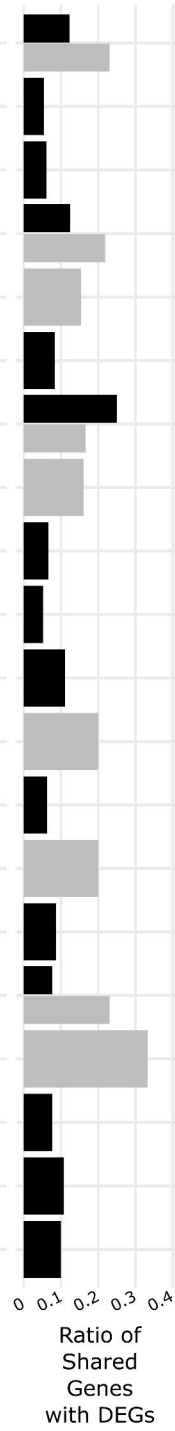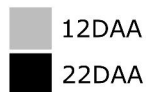

A

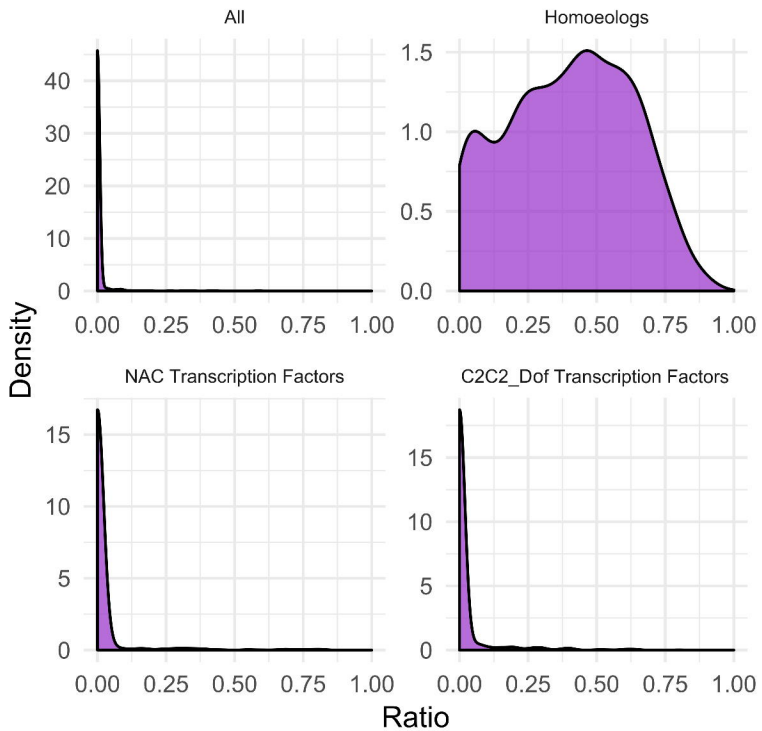

B

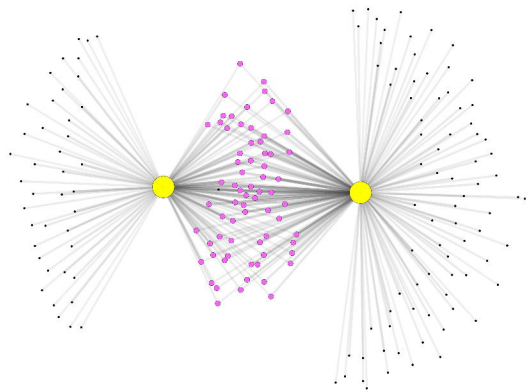

C

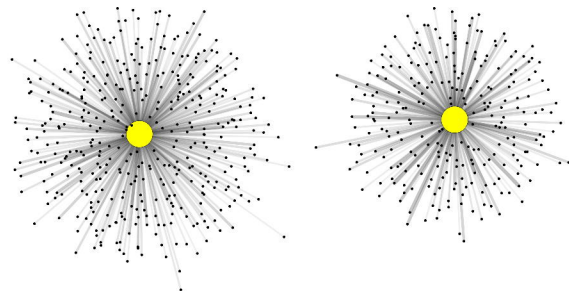

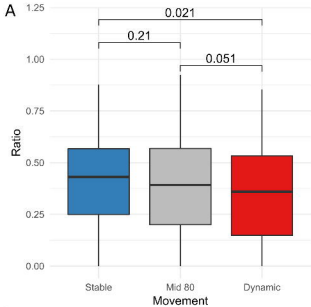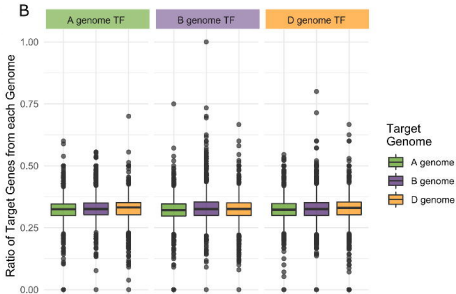

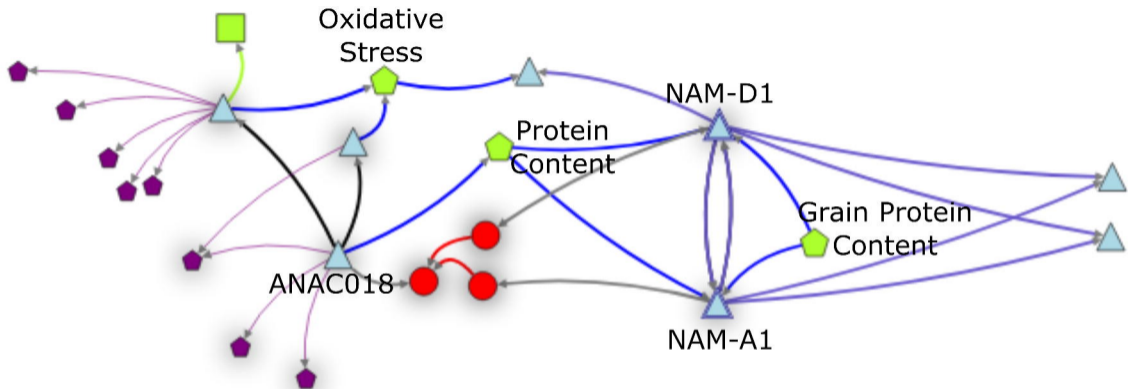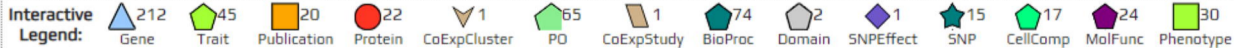

Source: https://www.biorxiv.org/content/biorxiv/early/2019/06/27/684183.full.pdf
