# Supplementary material for: Validation and characterisation of a wheat GENIE3 network using an independent RNA-Seq dataset
Source: bioRxiv preprint, doi:10.1101/684183, version 1 (2019-06-27)
Supplement: Supplementary Table 2 [file 684183_file08.xlsx]

## Sheet: 12DAA_gpcA1_ref_WT_NOFILTERING
Supplementary Table 2: Differentially expressed genes (DEGs) identified between the wild-type and nam-a1 genotypes at 12 and 22 days after anthesis (DAA). DEGs were ranked based on q-value, which has been adjusted for multiple comparisons using the Benjamini-Hochberg correction. "b" refers to the "beta" value, and acts as an estimator of fold change, with the corresponding standard error (se_b). …
Gene Rank	target_id	pval	qval	b	se_b	mean_obs	var_obs	tech_var	Timepoint	Comparison
1	TraesCS1A02G076700.1	7.07726e-70	4.49378e-65	6.54992	0.37067	4.43736	9.57867	0.103182	12DAA	WT vs nam-a1
2	TraesCS2B02G021500.1	1.69876e-52	5.39323e-48	-5.675	0.372181	3.25671	7.20869	0.0419951	12DAA	WT vs nam-a1
3	TraesCS5A02G515800LC.1	1.91978e-45	4.06327e-41	-4.36189	0.308303	2.48831	5.65633	0.0146607	12DAA	WT vs nam-a1
4	TraesCS1B02G300600.1	3.73572e-44	5.93008e-40	2.41321	0.173142	4.92617	1.43562	0.0165664	12DAA	WT vs nam-a1
5	TraesCS2A02G014300LC.1	1.362e-42	1.72963e-38	-4.6301	0.338491	2.42379	4.92327	0.0394966	12DAA	WT vs nam-a1
6	TraesCS2A02G032800.1	1.00296e-37	1.0614e-33	-1.59761	0.124442	5.62235	0.544905	0.005219	12DAA	WT vs nam-a1
7	TraesCS1B02G148600.1	3.0357e-34	2.43866e-30	-3.2802	0.268826	3.47594	2.99839	0.0780168	12DAA	WT vs nam-a1
8	TraesCS5A02G515700LC.1	3.07253e-34	2.43866e-30	-4.11683	0.337419	2.69237	5.16822	0.0499164	12DAA	WT vs nam-a1
9	TraesCS5A02G007900LC.1	1.07705e-33	7.59869e-30	-4.03697	0.333678	3.61503	4.13035	0.162042	12DAA	WT vs nam-a1
10	TraesCS1A02G035500.4	1.33242e-33	8.46033e-30	3.96817	0.328467	3.40191	4.46058	0.145782	12DAA	WT vs nam-a1
11	TraesCS2A02G012200.2	1.64836e-32	9.51493e-29	-6.67938	0.562601	3.57298	10.2926	0.57069	12DAA	WT vs nam-a1
12	TraesCS7A02G158200.1	5.18158e-30	2.74175e-26	2.32707	0.204464	5.56046	1.52766	0.00753031	12DAA	WT vs nam-a1
13	TraesCS7B02G062500.1	2.16476e-29	1.05734e-25	3.29281	0.29254	3.99196	2.92636	0.050689	12DAA	WT vs nam-a1
14	TraesCS4A02G034200LC.1	1.13626e-28	5.15343e-25	-4.08113	0.367377	2.7494	3.8382	0.140425	12DAA	WT vs nam-a1
15	TraesCS2B02G024000.1	3.20307e-28	1.35588e-24	-2.70856	0.245877	4.35224	1.73685	0.0271955	12DAA	WT vs nam-a1
16	TraesCS2B02G008400.1	2.37029e-26	9.40649e-23	-4.31816	0.406553	2.05507	4.19376	0.0281937	12DAA	WT vs nam-a1
17	TraesCS2A02G406900.1	6.55638e-25	2.44885e-21	2.75941	0.267724	7.59512	2.3033	0.00104505	12DAA	WT vs nam-a1
18	TraesCS2A02G033600.1	2.10706e-24	7.43275e-21	2.0975	0.205757	5.1414	1.17997	0.00926226	12DAA	WT vs nam-a1
19	TraesCS2B02G024100.1	1.05815e-23	3.53623e-20	-5.10566	0.508732	4.18982	6.34983	0.0846235	12DAA	WT vs nam-a1
20	TraesCS3A02G049800.1	6.84997e-23	2.17473e-19	3.68511	0.37412	3.28228	2.99328	0.203494	12DAA	WT vs nam-a1
21	TraesCS5A02G272100.1	4.38995e-22	1.32735e-18	-3.9384	0.407635	3.32987	4.02334	0.109655	12DAA	WT vs nam-a1
22	TraesCS2B02G168400.1	4.80217e-22	1.38599e-18	2.42957	0.251706	4.96413	1.51606	0.0148367	12DAA	WT vs nam-a1
23	TraesCS3B02G261200.1	5.1969e-21	1.43471e-17	1.26308	0.134297	5.40662	0.311323	0.00882678	12DAA	WT vs nam-a1
24	TraesCS1A02G291200.1	1.32625e-20	3.50881e-17	1.46986	0.157946	4.86206	0.693707	0.0146401	12DAA	WT vs nam-a1
25	TraesCS2A02G013500.1	1.87867e-19	4.77152e-16	-3.78868	0.420025	2.40641	3.50079	0.121277	12DAA	WT vs nam-a1
26	TraesCS1B02G042200.1	5.01389e-19	1.22447e-15	2.92098	0.32776	4.30297	2.42136	0.0366715	12DAA	WT vs nam-a1
27	TraesCS7B02G449100.1	8.31196e-19	1.95473e-15	2.69413	0.304224	4.53487	2.00891	0.0257604	12DAA	WT vs nam-a1
28	TraesCS2A02G002700.1	1.36797e-18	3.10217e-15	5.85452	0.665285	3.09901	6.98787	0.196045	12DAA	WT vs nam-a1
29	TraesCS1A02G483910LC.1	1.96321e-18	4.29848e-15	-2.60286	0.297151	3.14838	1.34941	0.0912175	12DAA	WT vs nam-a1
30	TraesCS1A02G077300LC.1	3.44172e-18	7.28451e-15	-1.917	0.22045	4.23877	0.857111	0.0207783	12DAA	WT vs nam-a1
31	TraesCS7A02G530500.1	5.47198e-18	1.1208e-14	3.08362	0.356774	6.11541	2.68362	0.00512137	12DAA	WT vs nam-a1
32	TraesCS6A02G325600.1	1.51238e-17	3.00094e-14	-1.59958	0.187608	5.29904	0.546909	0.00813943	12DAA	WT vs nam-a1
33	TraesCS2A02G017300.1	1.82901e-17	3.51925e-14	-3.91725	0.460627	1.86714	3.65505	0.036648	12DAA	WT vs nam-a1
34	TraesCS3B02G266000.1	5.6987e-17	1.06425e-13	1.00382	0.119912	6.04252	0.263619	0.00467836	12DAA	WT vs nam-a1
35	TraesCS7A02G530600.1	1.2153e-16	2.20475e-13	4.0916	0.494059	5.49732	4.098	0.0132058	12DAA	WT vs nam-a1
36	TraesCS2A02G027800.1	1.67578e-16	2.9557e-13	-4.18087	0.507187	1.72517	3.72496	0.0453943	12DAA	WT vs nam-a1
37	TraesCS7B02G321200.2	4.69474e-16	8.05668e-13	1.80319	0.222091	7.27494	0.80591	0.00110002	12DAA	WT vs nam-a1
38	TraesCS1A02G042800LC.1	8.73021e-16	1.45877e-12	-1.56763	0.194893	3.88528	0.708593	0.023549	12DAA	WT vs nam-a1
39	TraesCS5A02G509000.1	2.23072e-15	3.63184e-12	-4.0349	0.508956	2.83105	3.88723	0.172706	12DAA	WT vs nam-a1
40	TraesCSU02G030400.1	3.61905e-15	5.74488e-12	1.54383	0.19623	4.12735	0.682923	0.026521	12DAA	WT vs nam-a1
41	TraesCS2A02G022700.1	1.66757e-14	2.58254e-11	2.27148	0.295999	7.78809	1.19384	0.000941009	12DAA	WT vs nam-a1
42	TraesCS2B02G395000.1	6.72537e-14	1.01675e-10	2.6243	0.350228	3.36198	1.47656	0.0835223	12DAA	WT vs nam-a1
43	TraesCS1B02G058000LC.1	8.54151e-14	1.26128e-10	-3.56862	0.478258	1.86434	3.20881	0.0683022	12DAA	WT vs nam-a1
44	TraesCS2A02G143400.1	1.27271e-13	1.83663e-10	2.31926	0.313034	7.13582	1.47516	0.00142286	12DAA	WT vs nam-a1
45	TraesCS2A02G019700LC.1	1.71407e-13	2.41859e-10	-3.93311	0.533708	1.68446	3.33227	0.074116	12DAA	WT vs nam-a1
46	TraesCS5A02G218600.1	3.38378e-13	4.67079e-10	-2.07223	0.284718	3.65965	1.24344	0.0720053	12DAA	WT vs nam-a1
47	TraesCS6A02G593700LC.1	3.55805e-13	4.80685e-10	-2.51683	0.346128	3.25754	1.34776	0.0650947	12DAA	WT vs nam-a1
48	TraesCS3A02G052400LC.1	3.9326e-13	5.20218e-10	3.74177	0.515547	3.46538	3.70147	0.167162	12DAA	WT vs nam-a1
49	TraesCS7A02G225600.1	4.41419e-13	5.72007e-10	2.70805	0.373926	3.88966	1.56535	0.0389773	12DAA	WT vs nam-a1
50	TraesCS2A02G034500LC.1	5.66471e-13	7.19372e-10	3.4139	0.473606	2.97545	3.35507	0.208812	12DAA	WT vs nam-a1
51	TraesCS7B02G448000.1	8.67987e-13	1.08066e-09	3.32746	0.465382	3.11074	3.62271	0.163726	12DAA	WT vs nam-a1
52	TraesCS5B02G477900.1	1.05001e-12	1.28214e-09	-1.08513	0.152324	4.94908	0.474467	0.00991402	12DAA	WT vs nam-a1
53	TraesCS7A02G531700.1	1.18683e-12	1.42186e-09	2.8285	0.397994	4.71003	2.59169	0.0212885	12DAA	WT vs nam-a1
54	TraesCS7A02G063700.3	1.28082e-12	1.50606e-09	-2.01655	0.284167	6.58282	2.05094	0.0932523	12DAA	WT vs nam-a1
55	TraesCS2B02G438200.1	1.31785e-12	1.52142e-09	2.66181	0.375304	3.25098	2.09318	0.203369	12DAA	WT vs nam-a1
56	TraesCS1A02G034300.2	1.35025e-12	1.53099e-09	-1.7697	0.249637	5.19391	0.754631	0.0955431	12DAA	WT vs nam-a1
57	TraesCSU02G009100.1	1.53857e-12	1.71391e-09	-3.89464	0.550793	1.66042	3.30678	0.0948053	12DAA	WT vs nam-a1
58	TraesCS6A02G216500.1	1.57943e-12	1.72909e-09	3.08829	0.436981	5.05849	2.89367	0.025296	12DAA	WT vs nam-a1
59	TraesCS1A02G297500.1	3.26552e-12	3.51437e-09	1.71635	0.246397	5.22887	0.86607	0.00933237	12DAA	WT vs nam-a1
60	TraesCS5A02G273300.1	3.6622e-12	3.77233e-09	-2.03692	0.293097	3.18625	1.06433	0.0891917	12DAA	WT vs nam-a1
61	TraesCS7A02G179100.1	3.61929e-12	3.77233e-09	4.22502	0.607802	2.77108	5.52947	0.312412	12DAA	WT vs nam-a1
62	TraesCS7A02G206400.1	3.68346e-12	3.77233e-09	1.00799	0.145059	6.12005	0.23519	0.00326805	12DAA	WT vs nam-a1
63	TraesCS5A02G218400.1	4.0687e-12	4.10073e-09	-3.23083	0.465889	2.41033	3.4618	0.14958	12DAA	WT vs nam-a1
64	TraesCS2B02G535400.1	4.28122e-12	4.2475e-09	1.80923	0.261163	5.75056	0.711961	0.00515473	12DAA	WT vs nam-a1
65	TraesCS1A02G034700.1	4.6255e-12	4.51848e-09	-1.58003	0.22844	4.35019	0.660758	0.0167747	12DAA	WT vs nam-a1
66	TraesCS4A02G289900.1	5.15919e-12	4.96346e-09	-1.64993	0.239081	4.63961	0.705156	0.0119483	12DAA	WT vs nam-a1
67	TraesCS5B02G165800LC.1	6.81532e-12	6.38695e-09	2.87226	0.418606	2.59223	2.08172	0.19534	12DAA	WT vs nam-a1
68	TraesCS6B02G746300LC.1	6.84e-12	6.38695e-09	-3.6733	0.535392	1.68051	2.93503	0.0750636	12DAA	WT vs nam-a1
69	TraesCS4B02G256600.1	7.17719e-12	6.60468e-09	1.59368	0.232516	4.14585	0.558863	0.0264933	12DAA	WT vs nam-a1
70	TraesCS7B02G027700.1	7.41642e-12	6.72733e-09	3.07565	0.44904	2.83806	2.86663	0.285955	12DAA	WT vs nam-a1
71	TraesCS5A02G211700.1	1.20011e-11	1.07327e-08	-1.01079	0.14908	4.93817	0.266367	0.0110375	12DAA	WT vs nam-a1
72	TraesCS2A02G692500LC.1	1.35447e-11	1.19449e-08	3.11399	0.460465	2.48561	3.30832	0.248047	12DAA	WT vs nam-a1
73	TraesCSU02G020800.1	1.52227e-11	1.32408e-08	-1.1428	0.16941	5.14502	0.420621	0.0094237	12DAA	WT vs nam-a1
74	TraesCS3A02G276700.1	1.55076e-11	1.33064e-08	1.38978	0.206106	7.4386	0.533976	0.000932852	12DAA	WT vs nam-a1
75	TraesCS7A02G361000.1	1.65804e-11	1.40372e-08	0.942663	0.139999	5.76923	0.320121	0.00532467	12DAA	WT vs nam-a1
76	TraesCS7B02G449200.1	2.43132e-11	2.0313e-08	2.74141	0.410547	3.67571	2.16935	0.0755792	12DAA	WT vs nam-a1
77	TraesCS6B02G128200.1	2.81323e-11	2.31986e-08	2.48553	0.373425	4.9473	1.40813	0.016572	12DAA	WT vs nam-a1
78	TraesCS6B02G246400.1	3.36691e-11	2.74083e-08	3.15416	0.475772	5.23361	3.28415	0.0182011	12DAA	WT vs nam-a1
79	TraesCS3B02G310900.1	3.49938e-11	2.81261e-08	1.93458	0.292062	6.81187	1.0846	0.00250242	12DAA	WT vs nam-a1
80	TraesCS1A02G035800.1	3.86978e-11	3.03353e-08	0.757491	0.114615	6.66534	0.121917	0.00224036	12DAA	WT vs nam-a1
81	TraesCS7B02G063700.1	3.83105e-11	3.03353e-08	1.28183	0.19391	4.88021	0.376484	0.0111438	12DAA	WT vs nam-a1
82	TraesCS1A02G150900.1	5.00074e-11	3.87228e-08	2.15801	0.328419	5.12384	1.17859	0.0105407	12DAA	WT vs nam-a1
83	TraesCS2B02G308400.1	6.11484e-11	4.67793e-08	-1.38501	0.211746	3.78289	0.564587	0.0238722	12DAA	WT vs nam-a1
84	TraesCS2B02G533800.1	7.85844e-11	5.94023e-08	2.74271	0.421742	5.70061	2.16529	0.00767675	12DAA	WT vs nam-a1
85	TraesCS1B02G710300LC.1	8.31772e-11	6.21344e-08	-1.16304	0.179074	4.54519	0.327791	0.0111781	12DAA	WT vs nam-a1
86	TraesCS7B02G259300.1	1.27823e-10	9.4375e-08	1.25992	0.195952	5.8877	0.46244	0.0044074	12DAA	WT vs nam-a1
87	TraesCS1A02G479900LC.1	1.46229e-10	1.06723e-07	1.25618	0.195995	5.05617	0.384802	0.0255771	12DAA	WT vs nam-a1
88	TraesCS2B02G741110LC.1	1.81686e-10	1.31095e-07	1.66454	0.26106	3.41713	0.656703	0.0670483	12DAA	WT vs nam-a1
89	TraesCS1A02G596400LC.1	1.98605e-10	1.41692e-07	-1.11364	0.175034	4.57851	0.397898	0.0107079	12DAA	WT vs nam-a1
90	TraesCS5B02G447100.1	2.14211e-10	1.51128e-07	-0.980297	0.154358	4.96502	0.215329	0.00671124	12DAA	WT vs nam-a1
91	TraesCS2A02G505500.1	2.20405e-10	1.5379e-07	2.97883	0.469372	5.32539	2.36663	0.0160342	12DAA	WT vs nam-a1
92	TraesCS3B02G311000.1	2.65042e-10	1.80958e-07	1.79602	0.284272	5.12466	0.945875	0.113739	12DAA	WT vs nam-a1
93	TraesCS2A02G514200LC.2	2.63853e-10	1.80958e-07	1.94811	0.308311	3.782	0.877174	0.102167	12DAA	WT vs nam-a1
94	TraesCS7A02G477900.1	2.78355e-10	1.88026e-07	1.08622	0.172133	5.98154	0.270726	0.00366078	12DAA	WT vs nam-a1
95	TraesCS2A02G604300LC.1	3.21358e-10	2.14789e-07	-2.63911	0.419698	2.5988	1.83313	0.198357	12DAA	WT vs nam-a1
96	TraesCS2A02G563700LC.1	3.25581e-10	2.15345e-07	3.39726	0.540442	2.53643	3.8265	0.170807	12DAA	WT vs nam-a1
97	TraesCS2A02G020000.1	4.81857e-10	3.15423e-07	-3.02162	0.485409	1.98802	2.74972	0.141016	12DAA	WT vs nam-a1
98	TraesCS5A02G213300.1	7.50283e-10	4.86122e-07	2.10101	0.341344	2.7015	1.22894	0.0963005	12DAA	WT vs nam-a1
99	TraesCS7A02G127800.1	7.76093e-10	4.97766e-07	3.2662	0.531112	2.56928	2.73362	0.404802	12DAA	WT vs nam-a1
100	TraesCSU02G398800LC.1	8.4841e-10	5.38706e-07	1.87699	0.305918	3.37188	0.801569	0.0702986	12DAA	WT vs nam-a1
101	TraesCS1B02G062000.1	8.9408e-10	5.56573e-07	-3.10553	0.506839	1.95319	2.82703	0.167986	12DAA	WT vs nam-a1
102	TraesCS7A02G094300.1	8.90659e-10	5.56573e-07	1.78994	0.292099	5.21047	1.38425	0.00898515	12DAA	WT vs nam-a1
103	TraesCS2B02G177100.1	9.3737e-10	5.77857e-07	0.93576	0.152909	6.36793	0.215533	0.00259908	12DAA	WT vs nam-a1
104	TraesCSU02G007900.1	9.85021e-10	6.01393e-07	1.7067	0.279246	5.53686	0.690115	0.00511405	12DAA	WT vs nam-a1
105	TraesCS2A02G023200.1	1.08558e-09	6.56476e-07	5.00171	0.820452	1.5523	5.7924	0.0179377	12DAA	WT vs nam-a1
106	TraesCS3A02G470600.1	1.16659e-09	6.98808e-07	-1.03378	0.169896	6.6469	0.266476	0.0011844	12DAA	WT vs nam-a1
107	TraesCS1B02G306500.1	1.21201e-09	7.19234e-07	1.36374	0.22435	5.73967	0.636158	0.00427254	12DAA	WT vs nam-a1
108	TraesCS7A02G753800LC.1	1.33982e-09	7.87714e-07	4.09223	0.675001	2.51769	5.29123	0.223675	12DAA	WT vs nam-a1
109	TraesCS2B02G240810LC.1	1.50621e-09	8.77416e-07	-1.62993	0.26969	3.59059	0.698584	0.0420977	12DAA	WT vs nam-a1
110	TraesCS2B02G006300.1	2.5468e-09	1.4701e-06	1.7445	0.292779	5.1834	0.697587	0.0355793	12DAA	WT vs nam-a1
111	TraesCS2B02G044400.1	2.57323e-09	1.47198e-06	2.38069	0.399664	5.1982	1.52818	0.00853817	12DAA	WT vs nam-a1
112	TraesCS2A02G010200.1	2.63374e-09	1.49314e-06	0.725958	0.12195	7.93074	0.139215	0.000578479	12DAA	WT vs nam-a1
113	TraesCS2A02G016400.1	2.9528e-09	1.65921e-06	1.65677	0.279191	5.2998	0.627021	0.00881415	12DAA	WT vs nam-a1
114	TraesCS2A02G028900.1	3.09542e-09	1.72409e-06	0.867624	0.146398	4.81641	0.185552	0.00947347	12DAA	WT vs nam-a1
115	TraesCS2B02G489900.1	3.2768e-09	1.80925e-06	0.749711	0.126703	5.72285	0.297875	0.00365729	12DAA	WT vs nam-a1
116	TraesCS7A02G369100.1	3.42443e-09	1.87446e-06	0.751293	0.127126	6.6844	0.176238	0.00181258	12DAA	WT vs nam-a1
117	TraesCS1B02G231100.1	3.62524e-09	1.96742e-06	0.734323	0.124452	5.73231	0.117161	0.00582275	12DAA	WT vs nam-a1
118	TraesCS1A02G297400.1	3.79151e-09	2.04022e-06	3.06443	0.520008	3.68595	2.63642	0.105818	12DAA	WT vs nam-a1
119	TraesCS4A02G065300.1	3.99301e-09	2.13059e-06	0.818144	0.139034	5.07658	0.197188	0.0083869	12DAA	WT vs nam-a1
120	TraesCS7A02G420200.1	5.29448e-09	2.80148e-06	1.40112	0.240014	5.46173	0.601205	0.00567663	12DAA	WT vs nam-a1
121	TraesCS2B02G059820LC.1	5.34739e-09	2.8061e-06	1.13942	0.195241	3.78956	0.293275	0.0223174	12DAA	WT vs nam-a1
122	TraesCS1A02G558100LC.1	5.67177e-09	2.95192e-06	-1.44058	0.247261	3.54372	0.589783	0.0320757	12DAA	WT vs nam-a1
123	TraesCS3B02G440600.2	6.02776e-09	3.1117e-06	1.06473	0.183069	6.17536	0.310111	0.00317512	12DAA	WT vs nam-a1
124	TraesCS7A02G531800.1	6.27864e-09	3.21507e-06	2.34419	0.403534	4.84245	1.84301	0.0172676	12DAA	WT vs nam-a1
125	TraesCS4B02G071100LC.1	6.43837e-09	3.27048e-06	0.863411	0.148737	5.82261	0.228151	0.00416579	12DAA	WT vs nam-a1
126	TraesCS6A02G096100.1	7.94923e-09	4.00591e-06	-0.729751	0.126484	5.95688	0.35844	0.00298739	12DAA	WT vs nam-a1
127	TraesCS5A02G557100.1	8.29808e-09	4.14878e-06	1.37506	0.23863	4.76755	0.629722	0.0129015	12DAA	WT vs nam-a1
128	TraesCS1B02G375400LC.1	8.87561e-09	4.40286e-06	0.652367	0.113437	6.90031	0.111526	0.00119916	12DAA	WT vs nam-a1
129	TraesCS7B02G181700.1	9.87465e-09	4.86047e-06	-0.673732	0.117521	6.02957	0.130366	0.00351458	12DAA	WT vs nam-a1
130	TraesCS1A02G037700.1	1.03331e-08	5.04702e-06	-3.38611	0.591443	2.48868	3.95357	0.162202	12DAA	WT vs nam-a1
131	TraesCS1A02G202000.1	1.04743e-08	5.0769e-06	-0.804458	0.140569	5.50733	0.207717	0.00503987	12DAA	WT vs nam-a1
132	TraesCS3B02G420500.1	1.0974e-08	5.27881e-06	0.767428	0.134284	6.61781	0.322379	0.00159864	12DAA	WT vs nam-a1
133	TraesCS6A02G127600LC.1	1.1848e-08	5.65641e-06	1.92222	0.337119	4.28452	0.869626	0.0227066	12DAA	WT vs nam-a1
134	TraesCS2A02G006800.1	1.25221e-08	5.93359e-06	0.890171	0.156377	4.69021	0.177221	0.0137118	12DAA	WT vs nam-a1
135	TraesCS1B02G266100.2	1.33016e-08	6.25628e-06	0.664874	0.117011	6.32468	0.151407	0.00362467	12DAA	WT vs nam-a1
136	TraesCS1A02G331800.1	1.37015e-08	6.397e-06	-1.02697	0.180898	4.18346	0.4483	0.0213797	12DAA	WT vs nam-a1
137	TraesCS5A02G413600.1	1.40637e-08	6.51818e-06	3.60132	0.63486	2.49788	4.29313	0.410636	12DAA	WT vs nam-a1
138	TraesCS4B02G169900.1	1.46468e-08	6.73924e-06	-1.50212	0.265127	3.29674	0.734412	0.0649913	12DAA	WT vs nam-a1
139	TraesCS7B02G072700.1	1.49387e-08	6.8241e-06	-1.34786	0.238043	3.46289	0.508312	0.0462191	12DAA	WT vs nam-a1
140	TraesCSU02G008900.1	1.66548e-08	7.55366e-06	-3.47853	0.616368	1.46598	3.06552	0.0933982	12DAA	WT vs nam-a1
141	TraesCS5B02G072300.1	1.71351e-08	7.71638e-06	-0.744695	0.132069	6.1728	0.141237	0.00208481	12DAA	WT vs nam-a1
142	TraesCS1A02G255300.1	1.8302e-08	8.18385e-06	0.642884	0.114243	6.36961	0.112572	0.00234681	12DAA	WT vs nam-a1
143	TraesCS6A02G116900.1	2.16084e-08	9.59475e-06	-1.49791	0.267551	3.45845	0.551293	0.0474787	12DAA	WT vs nam-a1
144	TraesCS3B02G209100.1	2.19853e-08	9.69428e-06	1.15908	0.207141	3.90897	0.364649	0.035601	12DAA	WT vs nam-a1
145	TraesCS5A02G065500.1	2.34942e-08	1.02882e-05	-1.10415	0.197732	5.25581	0.397443	0.00696507	12DAA	WT vs nam-a1
146	TraesCS2A02G004600.1	2.41919e-08	1.05211e-05	-0.866715	0.155353	4.62149	0.173728	0.0119983	12DAA	WT vs nam-a1
147	TraesCS7B02G321200.1	2.50092e-08	1.08026e-05	1.51964	0.272669	5.11946	0.696208	0.012335	12DAA	WT vs nam-a1
148	TraesCS2A02G023400.1	2.76614e-08	1.18675e-05	0.848215	0.152677	6.36443	0.175076	0.00175684	12DAA	WT vs nam-a1
149	TraesCS5B02G060500.1	2.81138e-08	1.19806e-05	-2.51078	0.452165	2.7632	2.09772	0.200523	12DAA	WT vs nam-a1
150	TraesCS5B02G536200.1	2.88309e-08	1.22043e-05	1.88972	0.340589	5.75004	0.886571	0.0981772	12DAA	WT vs nam-a1
151	TraesCS7A02G456500.1	2.9072e-08	1.22249e-05	1.858	0.334959	3.37201	0.911184	0.0547534	12DAA	WT vs nam-a1
152	TraesCS7B02G266800.2	3.11556e-08	1.30148e-05	0.804989	0.145441	6.29155	0.214996	0.0153044	12DAA	WT vs nam-a1
153	TraesCS2A02G013900.1	3.18849e-08	1.32324e-05	-3.55011	0.641885	1.83923	3.63386	0.42159	12DAA	WT vs nam-a1
154	TraesCS2B02G018400.1	3.41281e-08	1.40714e-05	1.32044	0.239262	3.6003	0.410725	0.0435227	12DAA	WT vs nam-a1
155	TraesCS2B02G096200LC.1	3.70483e-08	1.51769e-05	-1.06579	0.193626	3.87967	0.275268	0.0226924	12DAA	WT vs nam-a1
156	TraesCS2A02G496200.1	4.06893e-08	1.65616e-05	0.852424	0.15533	6.79275	0.205191	0.00156974	12DAA	WT vs nam-a1
157	TraesCS7A02G393600.1	4.12647e-08	1.66888e-05	0.78995	0.144011	5.06062	0.177382	0.0110336	12DAA	WT vs nam-a1
158	TraesCS4B02G145000.1	4.25187e-08	1.70871e-05	-1.39689	0.254905	4.83914	0.820424	0.0110532	12DAA	WT vs nam-a1
159	TraesCS5A02G287800.1	4.45081e-08	1.77741e-05	1.95616	0.357488	2.78686	0.947844	0.131418	12DAA	WT vs nam-a1
160	TraesCS2B02G150600.1	4.73652e-08	1.86031e-05	1.25753	0.230277	5.50857	0.728586	0.00578077	12DAA	WT vs nam-a1
161	TraesCS7A02G231200.1	4.74629e-08	1.86031e-05	1.4929	0.273397	5.1636	1.10381	0.0108875	12DAA	WT vs nam-a1
162	TraesCSU02G016200.1	4.72338e-08	1.86031e-05	-0.66189	0.121194	5.70164	0.0964592	0.0040663	12DAA	WT vs nam-a1
163	TraesCSU02G308900LC.1	4.8037e-08	1.87126e-05	1.88891	0.346053	2.84319	0.713698	0.122848	12DAA	WT vs nam-a1
164	TraesCS4A02G342500.1	4.90187e-08	1.88636e-05	-0.764971	0.140237	6.36424	0.186625	0.00199481	12DAA	WT vs nam-a1
165	TraesCS6B02G124500.1	4.87656e-08	1.88636e-05	-0.648304	0.118829	5.85642	0.372052	0.00362375	12DAA	WT vs nam-a1
166	TraesCS6B02G630800LC.1	5.3027e-08	2.02832e-05	-1.01565	0.18667	5.41831	0.293056	0.00501722	12DAA	WT vs nam-a1
167	TraesCS1B02G168500.1	5.64106e-08	2.14482e-05	1.64631	0.303199	6.34559	0.680354	0.00260928	12DAA	WT vs nam-a1
168	TraesCS1B02G306400.1	5.79808e-08	2.1914e-05	2.83854	0.523241	3.34518	2.16975	0.0893087	12DAA	WT vs nam-a1
169	TraesCS2B02G160100.1	5.88969e-08	2.21285e-05	1.39311	0.256931	4.14138	0.551231	0.0414195	12DAA	WT vs nam-a1
170	TraesCS4A02G009600.1	6.19666e-08	2.31449e-05	2.05149	0.378991	4.13349	1.06447	0.0260565	12DAA	WT vs nam-a1
171	TraesCS6B02G571700LC.1	6.60775e-08	2.4536e-05	-1.00089	0.185298	4.72416	0.291069	0.0177813	12DAA	WT vs nam-a1
172	TraesCS5A02G554100.1	6.70116e-08	2.47382e-05	1.49602	0.277092	4.50568	0.542826	0.0184938	12DAA	WT vs nam-a1
173	TraesCS1B02G279300.1	7.70261e-08	2.81083e-05	-1.47785	0.275002	3.30561	0.939948	0.0761669	12DAA	WT vs nam-a1
174	TraesCS2B02G399800LC.1	7.6931e-08	2.81083e-05	-4.34064	0.807684	1.67472	4.5783	0.478874	12DAA	WT vs nam-a1
175	TraesCS7B02G704600LC.1	9.44948e-08	3.42859e-05	-0.840316	0.157451	4.42493	0.151341	0.00985935	12DAA	WT vs nam-a1
176	TraesCS4A02G388000.1	9.7785e-08	3.52782e-05	1.55905	0.292461	3.5353	0.632262	0.0524711	12DAA	WT vs nam-a1
177	TraesCS3A02G352300.1	1.01143e-07	3.62834e-05	1.26397	0.237381	5.95314	0.386412	0.00327975	12DAA	WT vs nam-a1
178	TraesCS6A02G100000.1	1.03461e-07	3.69064e-05	2.01779	0.379246	2.9944	0.977006	0.0994493	12DAA	WT vs nam-a1
179	TraesCS2A02G013600.1	1.04964e-07	3.72333e-05	-1.48908	0.280011	6.15674	0.552283	0.00815161	12DAA	WT vs nam-a1
180	TraesCS2B02G550700.2	1.17019e-07	4.1279e-05	-1.17332	0.221461	6.27767	0.412522	0.00478063	12DAA	WT vs nam-a1
181	TraesCS4B02G317500.1	1.23586e-07	4.33547e-05	-1.14375	0.216287	4.40657	0.498934	0.0190597	12DAA	WT vs nam-a1
182	TraesCS3A02G237400.1	1.29875e-07	4.53107e-05	0.729988	0.138281	7.02043	0.153674	0.00319886	12DAA	WT vs nam-a1
183	TraesCS2A02G022000.1	1.41504e-07	4.90981e-05	-0.878145	0.166844	4.37983	0.198096	0.0151427	12DAA	WT vs nam-a1
184	TraesCS5A02G279200.1	1.56434e-07	5.39832e-05	-1.29786	0.247455	6.51354	0.498453	0.00677981	12DAA	WT vs nam-a1
185	TraesCS2A02G342800.1	1.64425e-07	5.64341e-05	-0.760571	0.145268	5.0234	0.151829	0.0113537	12DAA	WT vs nam-a1
186	TraesCS2B02G160400.1	1.70403e-07	5.81714e-05	0.928102	0.17749	6.3778	0.270542	0.00198145	12DAA	WT vs nam-a1
187	TraesCS6B02G284900.1	1.82525e-07	6.19766e-05	0.915081	0.175427	5.60763	0.286213	0.00458792	12DAA	WT vs nam-a1
188	TraesCS2B02G008900LC.1	1.83896e-07	6.21099e-05	1.76074	0.337636	5.35309	0.839649	0.111314	12DAA	WT vs nam-a1
189	TraesCS2B02G141900LC.1	1.9111e-07	6.4205e-05	2.12697	0.408421	2.54418	1.33459	0.169469	12DAA	WT vs nam-a1
190	TraesCS4B02G220700.1	1.95922e-07	6.51321e-05	0.769693	0.147928	5.92509	0.189029	0.0107395	12DAA	WT vs nam-a1
191	TraesCS6B02G354500.1	1.95372e-07	6.51321e-05	2.4015	0.461499	2.41407	1.28812	0.234049	12DAA	WT vs nam-a1
192	TraesCS5A02G516100LC.1	2.00755e-07	6.63914e-05	-1.63857	0.315193	3.00793	1.26977	0.101015	12DAA	WT vs nam-a1
193	TraesCS4B02G303500.2	2.15158e-07	7.0786e-05	1.42835	0.275439	3.64692	0.579245	0.0489835	12DAA	WT vs nam-a1
194	TraesCS5A02G062500.1	2.23259e-07	7.30725e-05	-0.758345	0.146431	6.46525	0.140259	0.00196056	12DAA	WT vs nam-a1
195	TraesCS5A02G062000LC.1	2.25021e-07	7.32716e-05	1.67521	0.323563	3.34766	0.742491	0.0705054	12DAA	WT vs nam-a1
196	TraesCS3B02G384900.1	2.43739e-07	7.89616e-05	1.35236	0.261961	5.80553	0.463921	0.00378832	12DAA	WT vs nam-a1
197	TraesCS2A02G024700.1	2.57844e-07	8.31069e-05	-1.25845	0.244268	4.29945	0.538969	0.0276301	12DAA	WT vs nam-a1
198	TraesCS5B02G101900LC.1	2.84032e-07	9.10855e-05	-0.908702	0.177006	4.76727	0.216393	0.0119865	12DAA	WT vs nam-a1
199	TraesCSU02G021300LC.1	2.9044e-07	9.26723e-05	4.07734	0.794874	1.22451	4.08852	0.0328778	12DAA	WT vs nam-a1
200	TraesCS6B02G332700LC.1	3.04409e-07	9.66439e-05	-2.71462	0.530127	2.73773	2.09623	0.184946	12DAA	WT vs nam-a1
201	TraesCS1B02G021700LC.1	3.10333e-07	9.80344e-05	-3.1522	0.616017	1.51384	2.26215	0.134483	12DAA	WT vs nam-a1
202	TraesCS2A02G013700.1	3.16004e-07	9.93318e-05	-3.98533	0.779353	1.50918	3.85829	0.586342	12DAA	WT vs nam-a1
203	TraesCS2B02G150910LC.1	3.19982e-07	0.000100087	-1.52616	0.298588	4.06029	0.626087	0.0303982	12DAA	WT vs nam-a1
204	TraesCS5B02G018600.1	3.3286e-07	0.000103604	-0.60961	0.119442	5.95431	0.0917717	0.00274859	12DAA	WT vs nam-a1
205	TraesCS2B02G222900.1	3.52723e-07	0.000108844	-1.24837	0.245123	6.66891	0.530119	0.00195706	12DAA	WT vs nam-a1
206	TraesCS5B02G202200.1	3.54836e-07	0.000108844	-0.939886	0.184591	5.99812	0.374829	0.00317565	12DAA	WT vs nam-a1
207	TraesCS7A02G453400.1	3.53293e-07	0.000108844	1.06711	0.209544	3.92731	0.254536	0.0381008	12DAA	WT vs nam-a1
208	TraesCS5A02G516000LC.1	3.6955e-07	0.000112812	-3.09827	0.609414	1.4706	2.62549	0.0805232	12DAA	WT vs nam-a1
209	TraesCS5A02G048300.1	3.72901e-07	0.000113291	0.573391	0.112821	6.40902	0.105858	0.00169292	12DAA	WT vs nam-a1
210	TraesCSU02G011200.1	3.77325e-07	0.000114089	1.36332	0.268366	5.06848	0.458501	0.0101102	12DAA	WT vs nam-a1
211	TraesCS6A02G323900.1	3.88182e-07	0.000116815	1.22044	0.240496	4.33988	0.365979	0.015639	12DAA	WT vs nam-a1
212	TraesCS7B02G283800.1	4.333e-07	0.000129777	-3.0074	0.595087	1.93623	2.24299	0.35461	12DAA	WT vs nam-a1
213	TraesCS3A02G436100.1	4.39041e-07	0.000130268	-0.895088	0.177203	5.7349	0.214417	0.00354763	12DAA	WT vs nam-a1
214	TraesCS7A02G530400.1	4.37656e-07	0.000130268	3.14092	0.621742	3.14691	4.11054	0.161903	12DAA	WT vs nam-a1
215	TraesCS6B02G549800LC.1	4.67187e-07	0.000137974	-1.40746	0.279296	5.0546	0.493684	0.0088299	12DAA	WT vs nam-a1
216	TraesCS3B02G539300.1	4.72208e-07	0.000138812	-2.80772	0.557389	2.4333	2.87681	0.120468	12DAA	WT vs nam-a1
217	TraesCS2B02G724000LC.1	4.94349e-07	0.000144651	-1.55646	0.309529	3.26875	0.668642	0.0676872	12DAA	WT vs nam-a1
218	TraesCS3B02G034800.1	5.34837e-07	0.00015578	-1.32891	0.265074	5.27605	0.464932	0.0083349	12DAA	WT vs nam-a1
219	TraesCS1B02G139200.1	5.78363e-07	0.000167688	-0.940082	0.18808	4.49305	0.26344	0.0128123	12DAA	WT vs nam-a1
220	TraesCS2A02G349400.1	6.11906e-07	0.000176607	0.899289	0.180311	6.53491	0.225018	0.0019415	12DAA	WT vs nam-a1
221	TraesCS2B02G424600.1	6.4038e-07	0.000183989	1.25932	0.252946	3.38129	0.495097	0.0515336	12DAA	WT vs nam-a1
222	TraesCS2B02G192700.1	6.5407e-07	0.000187076	-3.10782	0.624747	4.8931	2.92071	0.0235084	12DAA	WT vs nam-a1
223	TraesCS3A02G142600.1	6.63701e-07	0.000188979	0.69107	0.139001	5.02851	0.154674	0.00660391	12DAA	WT vs nam-a1
224	TraesCS6A02G111400.1	6.83632e-07	0.000193785	2.60802	0.525179	2.08271	1.6098	0.259967	12DAA	WT vs nam-a1
225	TraesCS4A02G143700LC.1	6.92355e-07	0.000195386	2.66531	0.536982	2.10239	1.72401	0.292417	12DAA	WT vs nam-a1
226	TraesCS2A02G031600.1	7.66349e-07	0.00021531	-1.5059	0.304607	2.95021	0.518108	0.0817252	12DAA	WT vs nam-a1
227	TraesCS5A02G220400.3	8.23942e-07	0.000230472	4.45522	0.903768	1.81128	5.21135	0.298718	12DAA	WT vs nam-a1
228	TraesCS2A02G017600.1	8.54964e-07	0.0002381	3.92546	0.79747	1.5661	3.84275	0.164558	12DAA	WT vs nam-a1
229	TraesCS4A02G208400.1	8.93036e-07	0.000246804	0.568241	0.115641	7.32482	0.167156	0.000814511	12DAA	WT vs nam-a1
230	TraesCS5B02G529200.1	8.93991e-07	0.000246804	0.86489	0.176018	4.53762	0.19415	0.0151712	12DAA	WT vs nam-a1
231	TraesCS5B02G368300.1	9.14082e-07	0.000251258	0.672618	0.137009	5.76924	0.113251	0.00341392	12DAA	WT vs nam-a1
232	TraesCS2A02G152000.1	9.27377e-07	0.000253013	0.770995	0.157139	7.13167	0.157174	0.00108536	12DAA	WT vs nam-a1
233	TraesCSU02G298100LC.1	9.28437e-07	0.000253013	-3.7215	0.758525	2.12308	3.77874	0.873971	12DAA	WT vs nam-a1
234	TraesCS2A02G466800.1	9.67428e-07	0.000261395	-0.596234	0.121726	7.92439	0.164469	0.000512184	12DAA	WT vs nam-a1
235	TraesCS7A02G410700.1	9.66767e-07	0.000261395	-0.817312	0.166857	6.3696	0.245211	0.0103917	12DAA	WT vs nam-a1
236	TraesCS7A02G241100.3	9.77774e-07	0.000263071	-0.721201	0.147302	6.93512	0.183988	0.00732461	12DAA	WT vs nam-a1
237	TraesCS3B02G424300.1	1.03078e-06	0.000275162	-1.08812	0.222716	4.21039	0.348973	0.0139955	12DAA	WT vs nam-a1
238	TraesCS5A02G041100.1	1.03571e-06	0.000275162	0.978994	0.200419	3.86561	0.235781	0.0288757	12DAA	WT vs nam-a1
239	TraesCS7B02G650900LC.1	1.03185e-06	0.000275162	1.50215	0.307473	2.94233	0.528119	0.0843501	12DAA	WT vs nam-a1
240	TraesCS2A02G027200.1	1.06849e-06	0.000281514	-3.24662	0.665484	2.02552	3.34598	0.151659	12DAA	WT vs nam-a1
241	TraesCS5B02G741700LC.1	1.0646e-06	0.000281514	-3.38648	0.69405	1.39651	2.61833	0.230999	12DAA	WT vs nam-a1
242	TraesCS2A02G503100.1	1.15475e-06	0.000301738	-1.43478	0.295025	4.29135	0.998653	0.029694	12DAA	WT vs nam-a1
243	TraesCS6B02G405100LC.1	1.15174e-06	0.000301738	0.826837	0.169999	4.25789	0.177058	0.0150984	12DAA	WT vs nam-a1
244	TraesCS2B02G124300.1	1.18464e-06	0.000308278	-2.35684	0.485128	2.00392	1.78298	0.147317	12DAA	WT vs nam-a1
245	TraesCS7A02G166800.8	1.21431e-06	0.00031471	4.74232	0.977135	2.92847	6.61365	1.80328	12DAA	WT vs nam-a1
246	TraesCS7B02G137800.1	1.23999e-06	0.000320059	-0.86735	0.178867	4.20054	0.256604	0.0202377	12DAA	WT vs nam-a1
247	TraesCS2B02G417000.1	1.25059e-06	0.000321487	-0.549706	0.113401	6.35916	0.0809238	0.00196392	12DAA	WT vs nam-a1
248	TraesCS7B02G049800.1	1.25763e-06	0.000321994	-2.41571	0.498461	1.99232	1.77861	0.168565	12DAA	WT vs nam-a1
249	TraesCS3A02G381100.1	1.29442e-06	0.000330082	-0.575409	0.118871	7.67341	0.0966754	0.000666052	12DAA	WT vs nam-a1
250	TraesCS4A02G007400.1	1.34615e-06	0.0003419	1.48105	0.306458	4.02516	0.613395	0.0448486	12DAA	WT vs nam-a1
251	TraesCS2B02G006700.1	1.36206e-06	0.000344563	1.80426	0.373516	4.9697	0.828974	0.247564	12DAA	WT vs nam-a1
252	TraesCS5B02G076200.1	1.39614e-06	0.000351782	-1.56162	0.323614	2.85997	1.08292	0.0949266	12DAA	WT vs nam-a1
253	TraesCSU02G456000LC.1	1.42205e-06	0.000356895	1.39783	0.289893	3.46032	0.495048	0.0512977	12DAA	WT vs nam-a1
254	TraesCS3B02G034900.1	1.46886e-06	0.000365751	-1.34585	0.279487	4.35204	0.481834	0.02553	12DAA	WT vs nam-a1
255	TraesCS3A02G720300LC.1	1.46561e-06	0.000365751	2.92551	0.607473	2.25668	2.31882	0.504763	12DAA	WT vs nam-a1
256	TraesCS6A02G111900.1	1.49339e-06	0.000370409	1.14535	0.238013	3.60831	0.338128	0.0367128	12DAA	WT vs nam-a1
257	TraesCS3B02G322100.1	1.56179e-06	0.000385866	1.22492	0.255023	3.66453	0.551837	0.0681715	12DAA	WT vs nam-a1
258	TraesCS2A02G025300.1	1.59556e-06	0.00039268	-0.547176	0.114022	6.36703	0.0655144	0.00224586	12DAA	WT vs nam-a1
259	TraesCS7B02G355500.1	1.64958e-06	0.000404408	-0.827904	0.172761	6.54508	0.186565	0.00324131	12DAA	WT vs nam-a1
260	TraesCS2A02G022800.2	1.66698e-06	0.000407101	4.43353	0.92556	3.15993	5.03797	0.772481	12DAA	WT vs nam-a1
261	TraesCS2A02G031000.2	1.68518e-06	0.00040997	-0.582174	0.121592	5.61383	0.0802358	0.00376535	12DAA	WT vs nam-a1
262	TraesCS2A02G378300.1	1.72569e-06	0.000418222	1.15222	0.24089	4.49065	0.401332	0.0185779	12DAA	WT vs nam-a1
263	TraesCS3B02G010100.1	1.80274e-06	0.000435236	-2.56601	0.537455	3.439	1.67055	0.109666	12DAA	WT vs nam-a1
264	TraesCS3B02G495700.1	1.82717e-06	0.000438913	-2.15687	0.452017	3.3708	1.2706	0.050631	12DAA	WT vs nam-a1
265	TraesCS3A02G042800LC.1	1.8318e-06	0.000438913	1.11456	0.233604	3.50907	0.32576	0.0440882	12DAA	WT vs nam-a1
266	TraesCS2B02G096300LC.1	1.85917e-06	0.000443797	-3.24937	0.681474	2.22738	2.67984	0.143071	12DAA	WT vs nam-a1
267	TraesCS6B02G429400.1	1.92689e-06	0.000458238	2.19381	0.460794	4.7228	1.97255	0.212915	12DAA	WT vs nam-a1
268	TraesCS1A02G032900.1	1.93729e-06	0.000458994	2.29886	0.482967	3.69777	1.97378	0.0504588	12DAA	WT vs nam-a1
269	TraesCS3A02G019300.1	1.99153e-06	0.000467115	-1.04312	0.219406	3.69696	0.684623	0.0372869	12DAA	WT vs nam-a1
270	TraesCS4A02G425300.1	1.98996e-06	0.000467115	-0.682227	0.143492	6.37762	0.214101	0.00185	12DAA	WT vs nam-a1
271	TraesCS1B02G090100LC.1	1.99364e-06	0.000467115	1.09626	0.230594	5.49313	0.305622	0.00462355	12DAA	WT vs nam-a1
272	TraesCS4B02G394700.1	2.09358e-06	0.000488728	1.29229	0.272395	4.71878	0.540066	0.0188252	12DAA	WT vs nam-a1
273	TraesCS4A02G343400LC.1	2.22687e-06	0.000517939	-2.50959	0.530381	1.7767	2.24334	0.124961	12DAA	WT vs nam-a1
274	TraesCS2B02G119300.2	2.27338e-06	0.000526827	-0.842619	0.178239	5.06776	0.258807	0.00962348	12DAA	WT vs nam-a1
275	TraesCS4A02G163800LC.1	2.29745e-06	0.000530469	-1.33028	0.281522	3.11036	0.468113	0.0527465	12DAA	WT vs nam-a1
276	TraesCS3B02G127400.1	2.37524e-06	0.000546443	-0.635697	0.134723	5.10136	0.095228	0.00628617	12DAA	WT vs nam-a1
277	TraesCS3A02G230000.1	2.40885e-06	0.000552176	-1.18052	0.250339	4.70691	0.342615	0.0903942	12DAA	WT vs nam-a1
278	TraesCSU02G305600LC.1	2.55784e-06	0.000584218	-0.818495	0.17402	5.75359	0.175329	0.00368744	12DAA	WT vs nam-a1
279	TraesCS3A02G426700.1	2.59718e-06	0.000591077	1.00231	0.213242	5.98962	0.344408	0.00325912	12DAA	WT vs nam-a1
280	TraesCS4B02G202900.1	2.62302e-06	0.00059271	-1.48684	0.316461	5.06097	0.744924	0.0131831	12DAA	WT vs nam-a1
281	TraesCS5B02G002000LC.1	2.61946e-06	0.00059271	0.808079	0.171983	4.21092	0.211061	0.0155994	12DAA	WT vs nam-a1
282	TraesCS7B02G139000.1	2.6493e-06	0.000596524	3.48691	0.742482	2.16549	5.06025	0.358191	12DAA	WT vs nam-a1
283	TraesCS2B02G019800.1	2.83038e-06	0.000633886	0.681939	0.145628	4.83542	0.116388	0.00927722	12DAA	WT vs nam-a1
284	TraesCSU02G048500.1	2.8352e-06	0.000633886	0.93118	0.198868	6.21479	0.224983	0.00239029	12DAA	WT vs nam-a1
285	TraesCS1A02G066200.1	2.91797e-06	0.000650103	-0.962485	0.205813	3.75461	0.270001	0.0295304	12DAA	WT vs nam-a1
286	TraesCS1A02G045800.1	2.96525e-06	0.000658327	0.613459	0.131271	6.57248	0.12152	0.00271451	12DAA	WT vs nam-a1
287	TraesCS5A02G518710LC.1	2.98859e-06	0.000661197	3.52822	0.755249	1.56411	2.75828	0.557519	12DAA	WT vs nam-a1
288	TraesCS5B02G375500.1	3.10128e-06	0.000683747	0.719776	0.154326	5.54642	0.195834	0.00467204	12DAA	WT vs nam-a1
289	TraesCS4B02G247000.1	3.43271e-06	0.000754198	-0.824523	0.177582	4.20758	0.175246	0.0174043	12DAA	WT vs nam-a1
290	TraesCS5A02G466200.1	3.49953e-06	0.000766228	-0.532481	0.114781	6.08117	0.135362	0.00234743	12DAA	WT vs nam-a1
291	TraesCS1B02G611400LC.1	3.53497e-06	0.000771329	-1.80699	0.38969	2.9198	0.84218	0.13221	12DAA	WT vs nam-a1
292	TraesCS1B02G144500.1	3.60855e-06	0.000784686	0.996042	0.215001	6.62753	0.314828	0.00188282	12DAA	WT vs nam-a1
293	TraesCS4B02G007400LC.1	3.6327e-06	0.000787241	2.86879	0.619427	1.82443	2.12459	0.195511	12DAA	WT vs nam-a1
294	TraesCS5B02G588100LC.1	3.8033e-06	0.00082141	1.91399	0.414117	3.10233	1.59307	0.253962	12DAA	WT vs nam-a1
295	TraesCS1A02G009110LC.1	3.86516e-06	0.000831939	-2.94892	0.6385	1.40335	2.12527	0.0897282	12DAA	WT vs nam-a1
296	TraesCS4B02G205300.1	3.91695e-06	0.000840238	-0.87256	0.18904	5.37354	0.233844	0.0063108	12DAA	WT vs nam-a1
297	TraesCS4A02G300800.1	3.95835e-06	0.000843421	1.10222	0.23891	5.22382	0.385198	0.00675346	12DAA	WT vs nam-a1
298	TraesCS4B02G263500.1	3.95613e-06	0.000843421	-1.09238	0.236769	3.74447	0.360602	0.0291754	12DAA	WT vs nam-a1
299	TraesCS3A02G230000.2	3.98211e-06	0.000845645	-1.10778	0.240179	11.4252	0.300177	1.97111e-05	12DAA	WT vs nam-a1
300	TraesCSU02G544100LC.1	4.02665e-06	0.000852253	-1.47986	0.32101	4.26013	0.59819	0.0385737	12DAA	WT vs nam-a1
301	TraesCS1A02G104500.1	4.14205e-06	0.000873765	-1.16027	0.252006	5.16067	0.467397	0.00700126	12DAA	WT vs nam-a1
302	TraesCS4B02G393600.1	4.41512e-06	0.000928285	1.34969	0.293997	3.07285	0.471126	0.0813237	12DAA	WT vs nam-a1
303	TraesCS5A02G067100.1	4.54729e-06	0.000952921	2.31183	0.504254	2.08551	1.46002	0.200136	12DAA	WT vs nam-a1
304	TraesCS6A02G263500.1	4.5816e-06	0.000956951	2.48386	0.541962	3.25443	1.60318	0.118627	12DAA	WT vs nam-a1
305	TraesCS4A02G399300.1	4.6509e-06	0.00096824	1.49375	0.326149	4.19877	0.652874	0.0221479	12DAA	WT vs nam-a1
306	TraesCS2A02G175400.1	4.93184e-06	0.00102337	-0.51492	0.112732	6.43728	0.064476	0.001641	12DAA	WT vs nam-a1
307	TraesCS3A02G407700.1	5.14056e-06	0.00106321	1.16389	0.255296	6.63595	0.443834	0.00212414	12DAA	WT vs nam-a1
308	TraesCS2A02G136100.1	5.18809e-06	0.00106609	0.830882	0.18233	4.1602	0.176971	0.0219773	12DAA	WT vs nam-a1
309	TraesCS7A02G100600.1	5.18285e-06	0.00106609	1.28475	0.281914	3.41712	0.44386	0.0637809	12DAA	WT vs nam-a1
310	TraesCS1A02G046800.1	5.39865e-06	0.00110577	0.684511	0.150486	5.00802	0.14343	0.00786358	12DAA	WT vs nam-a1
311	TraesCS2A02G411200.1	5.41601e-06	0.00110577	1.01861	0.223968	4.16385	0.340203	0.0235597	12DAA	WT vs nam-a1
312	TraesCS2A02G004800.1	5.4833e-06	0.00111236	1.07972	0.237543	4.91434	0.326469	0.0110104	12DAA	WT vs nam-a1
313	TraesCS2B02G404400.1	5.47506e-06	0.00111236	1.27015	0.279418	4.53343	0.426596	0.0220774	12DAA	WT vs nam-a1
314	TraesCS3B02G314300.1	5.51367e-06	0.00111495	1.51512	0.333416	6.89777	0.617487	0.00170087	12DAA	WT vs nam-a1
315	TraesCS3B02G062600.1	5.54443e-06	0.00111762	1.00568	0.221366	5.71384	0.302972	0.00470175	12DAA	WT vs nam-a1
316	TraesCS5B02G536200.2	5.56944e-06	0.00111911	1.72386	0.379529	5.35519	0.940037	0.260426	12DAA	WT vs nam-a1
317	TraesCS7B02G370700.1	5.69115e-06	0.00113995	3.00089	0.661345	1.34372	2.29306	0.0878619	12DAA	WT vs nam-a1
318	TraesCS6A02G178600.1	5.82676e-06	0.00116345	0.846375	0.186731	3.99656	0.220029	0.0215286	12DAA	WT vs nam-a1
319	TraesCS5B02G208000.1	5.88036e-06	0.00117047	-1.083	0.23904	4.30426	0.645685	0.0184124	12DAA	WT vs nam-a1
320	TraesCS7A02G077500.1	5.92071e-06	0.00117482	0.514442	0.113583	6.85814	0.0723379	0.00136953	12DAA	WT vs nam-a1
321	TraesCS2A02G273800.1	5.99737e-06	0.00118032	3.22391	0.712234	2.33536	4.16387	0.218908	12DAA	WT vs nam-a1
322	TraesCS2B02G357900.1	6.01072e-06	0.00118032	1.01163	0.223514	4.27714	0.277074	0.0167005	12DAA	WT vs nam-a1
323	TraesCS3B02G091800.3	6.0228e-06	0.00118032	0.612003	0.135232	5.56038	0.123158	0.00438512	12DAA	WT vs nam-a1
324	TraesCS4A02G470700.1	5.97823e-06	0.00118032	-1.81138	0.400115	3.33932	1.57256	0.0639332	12DAA	WT vs nam-a1
325	TraesCS6B02G364700.1	6.11072e-06	0.00119386	0.573159	0.126734	6.89242	0.135276	0.00119997	12DAA	WT vs nam-a1
326	TraesCS2B02G007400.3	6.24957e-06	0.00121725	-1.24987	0.276657	4.20849	0.44868	0.0795601	12DAA	WT vs nam-a1
327	TraesCS1A02G078800.1	6.34016e-06	0.00122363	0.596646	0.132156	6.83103	0.099233	0.00128405	12DAA	WT vs nam-a1
328	TraesCS2B02G533400.1	6.31682e-06	0.00122363	-4.21091	0.932546	1.56547	4.29879	1.15707	12DAA	WT vs nam-a1
329	TraesCS6B02G357800.1	6.32874e-06	0.00122363	0.519483	0.115055	6.97051	0.113963	0.00175212	12DAA	WT vs nam-a1
330	TraesCS5B02G558600.1	6.4473e-06	0.00124054	0.725942	0.160921	4.6048	0.178792	0.0152485	12DAA	WT vs nam-a1
331	TraesCS5B02G392500.2	6.67803e-06	0.00128105	-1.34156	0.297879	5.35855	0.560145	0.149832	12DAA	WT vs nam-a1
332	TraesCS4A02G407000.1	6.77632e-06	0.00129599	0.761014	0.169092	6.78801	0.252285	0.00173765	12DAA	WT vs nam-a1
333	TraesCS5A02G267500.1	6.83074e-06	0.00130248	0.653208	0.145193	6.89668	0.123745	0.00171035	12DAA	WT vs nam-a1
334	TraesCS6A02G255600.1	7.08711e-06	0.00134732	-2.27584	0.50675	4.94442	1.5659	0.0150606	12DAA	WT vs nam-a1
335	TraesCS1B02G197900.1	7.19242e-06	0.00136325	0.894245	0.199256	3.96171	0.18256	0.0305798	12DAA	WT vs nam-a1
336	TraesCS3A02G402000.1	7.41258e-06	0.00139837	0.65329	0.145775	8.06412	0.158519	0.000336645	12DAA	WT vs nam-a1
337	TraesCS7A02G363600.1	7.42192e-06	0.00139837	-1.1166	0.249174	5.50797	0.400407	0.00497315	12DAA	WT vs nam-a1
338	TraesCS7B02G140500.1	7.44377e-06	0.00139837	0.521214	0.116327	6.0644	0.0813243	0.00302978	12DAA	WT vs nam-a1
339	TraesCSU02G021800LC.1	7.57452e-06	0.00141874	-1.17588	0.262657	3.7161	0.502332	0.081308	12DAA	WT vs nam-a1
340	TraesCS2A02G064900.1	7.65128e-06	0.0014289	-1.73162	0.386979	5.66662	0.903376	0.00474297	12DAA	WT vs nam-a1
341	TraesCS2A02G316500.1	7.75064e-06	0.00144321	0.925987	0.207065	4.91174	0.26919	0.0101049	12DAA	WT vs nam-a1
342	TraesCS2A02G635200LC.1	7.78142e-06	0.0014447	2.66207	0.595394	2.59591	1.88816	0.158856	12DAA	WT vs nam-a1
343	TraesCS1A02G033600.1	7.8054e-06	0.00144493	-1.21782	0.272415	4.59846	0.416242	0.0118246	12DAA	WT vs nam-a1
344	TraesCS1A02G161900.1	7.84319e-06	0.00144771	0.528602	0.118271	5.88144	0.0707168	0.0034485	12DAA	WT vs nam-a1
345	TraesCS3A02G480800LC.1	7.91317e-06	0.00145639	0.671766	0.150367	5.78324	0.126153	0.0037541	12DAA	WT vs nam-a1
346	TraesCS3B02G183300.2	8.20362e-06	0.00150114	0.915831	0.205353	6.74041	0.341438	0.012202	12DAA	WT vs nam-a1
347	TraesCS2A02G664800LC.1	8.20324e-06	0.00150114	0.649931	0.145731	4.85521	0.119196	0.009597	12DAA	WT vs nam-a1
348	TraesCS1B02G354000.1	8.26803e-06	0.00150426	1.44966	0.325173	3.94364	0.556389	0.0363024	12DAA	WT vs nam-a1
349	TraesCS7B02G159400.1	8.25016e-06	0.00150426	0.718807	0.161219	5.45397	0.210364	0.00498534	12DAA	WT vs nam-a1
350	TraesCS2B02G333600.1	8.32179e-06	0.00150971	0.592358	0.132913	6.07372	0.130629	0.00271336	12DAA	WT vs nam-a1
351	TraesCS1A02G113600.1	8.44129e-06	0.00152703	1.6889	0.379215	4.44121	0.835248	0.0308961	12DAA	WT vs nam-a1
352	TraesCS4A02G083500.1	8.67744e-06	0.00156529	0.600858	0.135092	7.05938	0.130144	0.000987027	12DAA	WT vs nam-a1
353	TraesCSU02G230200.1	8.72614e-06	0.00156962	-0.762233	0.171421	6.61066	0.309498	0.00142681	12DAA	WT vs nam-a1
354	TraesCS2A02G196600.1	9.19515e-06	0.00164931	-0.913356	0.20593	3.87941	0.491263	0.0337618	12DAA	WT vs nam-a1
355	TraesCS3A02G480300.1	9.27128e-06	0.00165502	-1.39698	0.315096	3.8412	0.614915	0.0331423	12DAA	WT vs nam-a1
356	TraesCS6A02G281000.1	9.27912e-06	0.00165502	0.951786	0.214689	6.54794	0.246032	0.00215681	12DAA	WT vs nam-a1
357	TraesCS4B02G057200.2	9.32106e-06	0.00165784	0.781194	0.176248	6.58495	0.162298	0.0109628	12DAA	WT vs nam-a1
358	TraesCS2A02G399000.1	1.00398e-05	0.00178069	-0.500483	0.113326	7.00134	0.0870828	0.000875345	12DAA	WT vs nam-a1
359	TraesCS5A02G501700.1	1.01669e-05	0.00179822	0.724107	0.164063	4.96993	0.165211	0.0101189	12DAA	WT vs nam-a1
360	TraesCS1A02G100300.1	1.04629e-05	0.00184543	0.862051	0.195593	5.25798	0.237903	0.00574279	12DAA	WT vs nam-a1
361	TraesCS5A02G533200.1	1.06086e-05	0.0018575	-1.73908	0.394852	2.80823	1.20052	0.190559	12DAA	WT vs nam-a1
362	TraesCS6B02G345300.1	1.06191e-05	0.0018575	-0.601234	0.136515	5.12923	0.0904741	0.00754348	12DAA	WT vs nam-a1
363	TraesCS6B02G398100.1	1.06113e-05	0.0018575	-0.916155	0.208013	4.62911	0.326962	0.0122926	12DAA	WT vs nam-a1
364	TraesCS7A02G225800.1	1.13923e-05	0.00198727	-0.531593	0.121122	5.67601	0.0927903	0.00389459	12DAA	WT vs nam-a1
365	TraesCS3A02G313200.1	1.14505e-05	0.00199195	-0.867239	0.197648	7.79032	0.26121	0.000442853	12DAA	WT vs nam-a1
366	TraesCS3A02G096300.1	1.1592e-05	0.00201105	-0.887717	0.202438	5.04667	0.468386	0.00700028	12DAA	WT vs nam-a1
367	TraesCS4A02G463900.1	1.18736e-05	0.0020543	2.20206	0.502766	2.15064	1.17078	0.23848	12DAA	WT vs nam-a1
368	TraesCS2B02G569100.1	1.22791e-05	0.00211869	-0.760187	0.173854	4.23334	0.239049	0.0173045	12DAA	WT vs nam-a1
369	TraesCS7B02G250200.2	1.2344e-05	0.0021241	0.727839	0.166499	7.92848	0.150807	0.00133276	12DAA	WT vs nam-a1
370	TraesCS2A02G426000.1	1.23831e-05	0.00212507	1.94571	0.445168	2.55691	0.913462	0.234655	12DAA	WT vs nam-a1
371	TraesCS6B02G411100.1	1.26263e-05	0.00216098	-1.36773	0.313234	3.26318	0.956449	0.0785759	12DAA	WT vs nam-a1
372	TraesCS5B02G605100LC.1	1.27197e-05	0.00217111	1.01516	0.232574	3.54508	0.263264	0.0446684	12DAA	WT vs nam-a1
373	TraesCS5B02G463500.1	1.29884e-05	0.00221102	-0.895728	0.205428	3.99228	0.331918	0.0242218	12DAA	WT vs nam-a1
374	TraesCSU02G261600LC.1	1.32331e-05	0.00224665	0.836298	0.191978	4.83782	0.290684	0.0105124	12DAA	WT vs nam-a1
375	TraesCS6B02G206600.1	1.36608e-05	0.00231308	-1.03247	0.237391	4.44822	0.287045	0.0133002	12DAA	WT vs nam-a1
376	TraesCS1B02G147700LC.1	1.4061e-05	0.00237451	0.493028	0.113525	6.96961	0.0945612	0.00105529	12DAA	WT vs nam-a1
377	TraesCS1B02G147200.1	1.43556e-05	0.00241144	1.26458	0.291489	4.34805	0.429808	0.0272467	12DAA	WT vs nam-a1
378	TraesCS6A02G373400.2	1.43253e-05	0.00241144	-2.10116	0.484271	2.2958	2.18959	0.240433	12DAA	WT vs nam-a1
379	TraesCS5B02G169400LC.1	1.59505e-05	0.00267227	-2.31544	0.536587	2.24944	1.46393	0.224802	12DAA	WT vs nam-a1
380	TraesCS2A02G578200.1	1.62737e-05	0.00271212	1.59137	0.369168	3.16124	0.771604	0.0797567	12DAA	WT vs nam-a1
381	TraesCS2A02G582000.1	1.62363e-05	0.00271212	-1.43811	0.333574	4.35155	0.736034	0.0244396	12DAA	WT vs nam-a1
382	TraesCS4B02G454000LC.1	1.63912e-05	0.00272454	-1.07243	0.248875	4.11152	0.3229	0.0312623	12DAA	WT vs nam-a1
383	TraesCS2A02G121000.1	1.65389e-05	0.00274191	0.651047	0.151156	5.78688	0.157036	0.00421271	12DAA	WT vs nam-a1
384	TraesCS1A02G343700.1	1.68688e-05	0.00278932	-1.19799	0.278423	3.32856	0.419328	0.0550768	12DAA	WT vs nam-a1
385	TraesCS7A02G021300.1	1.69469e-05	0.00279497	-2.14311	0.498197	2.1629	2.2662	0.171003	12DAA	WT vs nam-a1
386	TraesCS5B02G493800.1	1.70947e-05	0.00281203	0.49637	0.11544	7.25292	0.0582303	0.00100438	12DAA	WT vs nam-a1
387	TraesCS5A02G142700.1	1.7185e-05	0.00281958	-0.964725	0.224426	3.91229	0.273308	0.0245058	12DAA	WT vs nam-a1
388	TraesCS2B02G399700LC.1	1.7665e-05	0.00288494	-1.51434	0.352785	3.54945	0.647008	0.185585	12DAA	WT vs nam-a1
389	TraesCS7A02G430310LC.1	1.76742e-05	0.00288494	0.972896	0.226655	4.25457	0.308551	0.0599838	12DAA	WT vs nam-a1
390	TraesCS4B02G002700.1	1.84753e-05	0.00300797	0.561121	0.131025	6.20252	0.0887932	0.0023555	12DAA	WT vs nam-a1
391	TraesCS1A02G229900.1	1.86667e-05	0.00303136	0.663185	0.15494	5.2247	0.121411	0.0133249	12DAA	WT vs nam-a1
392	TraesCS1A02G174700.1	1.87482e-05	0.00303682	-0.500928	0.117058	7.2432	0.0682441	0.000974197	12DAA	WT vs nam-a1
393	TraesCS5A02G199700.1	1.9067e-05	0.0030806	0.49424	0.115597	6.73552	0.0910215	0.0017124	12DAA	WT vs nam-a1
394	TraesCS7B02G038300.1	1.91794e-05	0.00309091	1.19489	0.279557	7.79764	0.387681	0.000730843	12DAA	WT vs nam-a1
395	TraesCS2B02G355600.1	1.94614e-05	0.0031284	-0.781964	0.183088	5.00351	0.276284	0.0087154	12DAA	WT vs nam-a1
396	TraesCS1A02G196600.1	2.02149e-05	0.00322634	0.533517	0.125165	5.63714	0.0685796	0.00566692	12DAA	WT vs nam-a1
397	TraesCS1A02G340100.1	2.0223e-05	0.00322634	1.26593	0.296998	3.95624	0.500104	0.0378478	12DAA	WT vs nam-a1
398	TraesCS2A02G016700.1	2.01563e-05	0.00322634	0.832751	0.195337	6.71905	0.189829	0.00164008	12DAA	WT vs nam-a1
399	TraesCS6B02G757100LC.1	2.03973e-05	0.00324599	0.665975	0.156314	5.30902	0.121034	0.00716182	12DAA	WT vs nam-a1
400	TraesCS2B02G332200.1	2.06233e-05	0.00326557	0.937704	0.22022	3.957	0.241568	0.028321	12DAA	WT vs nam-a1
401	TraesCS3B02G597800.1	2.05942e-05	0.00326557	0.564265	0.132508	8.18978	0.0943324	0.00403841	12DAA	WT vs nam-a1
402	TraesCS5A02G228900.1	2.06876e-05	0.00326761	1.2707	0.298473	5.14878	0.546035	0.00973385	12DAA	WT vs nam-a1
403	TraesCS1A02G229000LC.1	2.08209e-05	0.0032805	-1.79506	0.421782	2.38897	0.759848	0.157906	12DAA	WT vs nam-a1
404	TraesCS3A02G344800.1	2.10531e-05	0.00330888	-3.29383	0.774396	2.92044	3.91865	0.168916	12DAA	WT vs nam-a1
405	TraesCS7B02G369600.1	2.12252e-05	0.00332769	-0.793171	0.186558	4.36458	0.380251	0.0159171	12DAA	WT vs nam-a1
406	TraesCS1A02G253600.1	2.17579e-05	0.00339995	2.03591	0.479484	2.3156	0.930219	0.243135	12DAA	WT vs nam-a1
407	TraesCS5B02G178100.1	2.17932e-05	0.00339995	1.51914	0.357808	2.86386	0.515563	0.142014	12DAA	WT vs nam-a1
408	TraesCS6A02G536300LC.1	2.20686e-05	0.00343448	1.79556	0.423195	3.44636	0.880042	0.114528	12DAA	WT vs nam-a1
409	TraesCS4B02G055400.1	2.22017e-05	0.00344675	1.362	0.321111	5.00773	0.507611	0.00733149	12DAA	WT vs nam-a1
410	TraesCS2A02G364900.1	2.29307e-05	0.00355124	2.28948	0.540704	3.13248	3.44397	0.25288	12DAA	WT vs nam-a1
411	TraesCS7B02G278900.1	2.3281e-05	0.00359671	-0.632945	0.149602	4.77285	0.168652	0.0107711	12DAA	WT vs nam-a1
412	TraesCS3A02G484600.1	2.36224e-05	0.00363179	-1.06176	0.251151	5.19888	0.339865	0.00755843	12DAA	WT vs nam-a1
413	TraesCS4A02G339800LC.1	2.36019e-05	0.00363179	-0.765801	0.181136	4.49	0.162858	0.0223895	12DAA	WT vs nam-a1
414	TraesCS7A02G216900.1	2.42592e-05	0.00372068	-0.881969	0.208919	4.0711	0.276043	0.0225565	12DAA	WT vs nam-a1
415	TraesCS2A02G027100.1	2.44397e-05	0.00373933	-3.26854	0.774552	2.63627	3.4446	0.181202	12DAA	WT vs nam-a1
416	TraesCS5A02G053700.1	2.46412e-05	0.00376111	0.559155	0.132562	6.15579	0.106117	0.00300165	12DAA	WT vs nam-a1
417	TraesCS5B02G336900.1	2.47569e-05	0.0037697	1.65396	0.392212	2.63984	0.750923	0.154198	12DAA	WT vs nam-a1
418	TraesCS5A02G029900.1	2.53412e-05	0.00384024	0.919192	0.218245	4.83584	0.301823	0.0125511	12DAA	WT vs nam-a1
419	TraesCS2B02G681400LC.1	2.52944e-05	0.00384024	-2.45983	0.583983	1.9208	1.54354	0.321107	12DAA	WT vs nam-a1
420	TraesCS4A02G121000.3	2.64723e-05	0.00400211	0.798435	0.190019	7.8138	0.203903	0.0157229	12DAA	WT vs nam-a1
421	TraesCS2B02G593100LC.1	2.68139e-05	0.00404412	1.61007	0.383445	4.46919	0.788396	0.0230645	12DAA	WT vs nam-a1
422	TraesCS2B02G036200.1	2.84205e-05	0.00427628	0.579446	0.138432	4.98345	0.101974	0.00702188	12DAA	WT vs nam-a1
423	TraesCS3A02G085200.2	2.86285e-05	0.00427716	-0.493992	0.118064	7.63301	0.0980025	0.000502442	12DAA	WT vs nam-a1
424	TraesCSU02G224100.1	2.86209e-05	0.00427716	-0.835637	0.199714	6.57601	0.400889	0.00141266	12DAA	WT vs nam-a1
425	TraesCS7B02G163500LC.1	2.85719e-05	0.00427716	2.77917	0.66415	2.3825	3.30375	0.210613	12DAA	WT vs nam-a1
426	TraesCS1A02G242100.1	2.93043e-05	0.00436785	-0.745587	0.178421	5.54015	0.196439	0.0044537	12DAA	WT vs nam-a1
427	TraesCS3B02G007500.1	3.03792e-05	0.00451746	-0.857652	0.205642	3.82024	0.232873	0.0316951	12DAA	WT vs nam-a1
428	TraesCS2A02G442200.1	3.12633e-05	0.00463807	1.13116	0.271649	3.62178	0.391266	0.038648	12DAA	WT vs nam-a1
429	TraesCS5A02G079500.1	3.18465e-05	0.00471358	1.16615	0.280334	3.16257	0.3996	0.0728525	12DAA	WT vs nam-a1
430	TraesCS1A02G129600.1	3.20214e-05	0.00472845	1.38306	0.332579	4.63946	0.580007	0.0168178	12DAA	WT vs nam-a1
431	TraesCS3A02G262900.1	3.21736e-05	0.00473989	-2.01423	0.48448	2.86274	1.33592	0.1153	12DAA	WT vs nam-a1
432	TraesCS7B02G332700.1	3.26974e-05	0.00480592	-0.787344	0.189547	3.93702	0.302857	0.0223966	12DAA	WT vs nam-a1
433	TraesCS4A02G415600.1	3.35528e-05	0.00492025	1.32328	0.319023	2.87128	0.530066	0.0904358	12DAA	WT vs nam-a1
434	TraesCS2A02G300100.1	3.37525e-05	0.00493812	4.60078	1.10955	2.53673	5.84705	2.29658	12DAA	WT vs nam-a1
435	TraesCS4B02G168900.1	3.41494e-05	0.00498472	-4.20996	1.01595	1.35388	4.59525	1.2882	12DAA	WT vs nam-a1
436	TraesCS5B02G197300.2	3.4477e-05	0.00502099	-0.62831	0.151704	7.27121	0.157454	0.0130798	12DAA	WT vs nam-a1
437	TraesCS2B02G310800.1	3.47646e-05	0.00505129	-0.556687	0.134473	5.25258	0.140111	0.0063077	12DAA	WT vs nam-a1
438	TraesCS7B02G058800.1	3.50634e-05	0.00508307	3.1996	0.773258	1.75552	2.73015	0.745559	12DAA	WT vs nam-a1
439	TraesCS3B02G029500.1	3.52518e-05	0.00509874	-1.49774	0.362072	3.45676	1.37972	0.128516	12DAA	WT vs nam-a1
440	TraesCS1B02G005300.1	3.61206e-05	0.00521254	0.976228	0.236318	7.21741	0.380054	0.000900848	12DAA	WT vs nam-a1
441	TraesCS6A02G163900.1	3.6361e-05	0.00523533	0.89182	0.215965	3.63306	0.271132	0.0333611	12DAA	WT vs nam-a1
442	TraesCS6B02G217200.1	3.65217e-05	0.00524657	-0.718528	0.174043	5.4766	0.260511	0.0338655	12DAA	WT vs nam-a1
443	TraesCS3A02G280600.1	3.66235e-05	0.00524931	1.32295	0.320497	6.71399	0.514645	0.00175409	12DAA	WT vs nam-a1
444	TraesCS2B02G200300.1	3.78101e-05	0.00540413	-0.595703	0.144572	5.0116	0.157723	0.00684772	12DAA	WT vs nam-a1
445	TraesCS3A02G009600.1	3.78738e-05	0.00540413	0.560014	0.135923	5.08833	0.0771637	0.00680003	12DAA	WT vs nam-a1
446	TraesCS2A02G029500.1	3.83424e-05	0.00542342	0.7681	0.186557	4.04924	0.166318	0.0228296	12DAA	WT vs nam-a1
447	TraesCS5A02G320300.1	3.82146e-05	0.00542342	-0.560784	0.136178	7.52533	0.0792596	0.0102626	12DAA	WT vs nam-a1
448	TraesCS5A02G457200.1	3.8267e-05	0.00542342	-0.919651	0.223341	4.75985	0.371729	0.0120739	12DAA	WT vs nam-a1
449	TraesCS5A02G609400LC.1	3.83507e-05	0.00542342	0.552176	0.134114	5.47598	0.0910065	0.00576449	12DAA	WT vs nam-a1
450	TraesCS5A02G210000.1	3.89559e-05	0.00549676	-1.03948	0.252693	4.25813	0.444025	0.0185751	12DAA	WT vs nam-a1
451	TraesCS3A02G276800.2	3.91904e-05	0.00550065	1.38879	0.337723	5.94495	0.588499	0.203789	12DAA	WT vs nam-a1
452	TraesCS2B02G046400LC.1	3.92433e-05	0.00550065	-2.24113	0.545035	3.46284	3.01234	0.105853	12DAA	WT vs nam-a1
453	TraesCS2B02G415100LC.1	3.91264e-05	0.00550065	-0.563174	0.136939	5.94356	0.170055	0.00299769	12DAA	WT vs nam-a1
454	TraesCS4B02G336500LC.2	3.93323e-05	0.00550098	0.498138	0.121161	7.83166	0.0976141	0.000836601	12DAA	WT vs nam-a1
455	TraesCS5A02G140000.1	3.97117e-05	0.00552968	0.684156	0.166496	5.7881	0.149332	0.00392986	12DAA	WT vs nam-a1
456	TraesCS5A02G284500.1	3.96747e-05	0.00552968	1.48039	0.360248	3.12155	0.850953	0.0836994	12DAA	WT vs nam-a1
457	TraesCS3A02G128400LC.1	3.99319e-05	0.00554817	0.617356	0.150286	5.32558	0.106256	0.00455647	12DAA	WT vs nam-a1
458	TraesCS5A02G503900.1	4.07674e-05	0.0056519	1.01089	0.246374	8.45262	0.468101	0.000294212	12DAA	WT vs nam-a1
459	TraesCS1B02G362200.1	4.14637e-05	0.0057359	-1.01735	0.248184	6.73172	0.378005	0.00170441	12DAA	WT vs nam-a1
460	TraesCS4A02G248100LC.1	4.26179e-05	0.00588275	0.690411	0.168689	4.26019	0.141201	0.0142521	12DAA	WT vs nam-a1
461	TraesCS2B02G059800.1	4.27836e-05	0.00589282	-1.13702	0.27787	3.92638	0.361447	0.0233475	12DAA	WT vs nam-a1
462	TraesCS6A02G539600LC.1	4.35325e-05	0.00598299	-2.87306	0.702822	2.51439	2.59007	0.154727	12DAA	WT vs nam-a1
463	TraesCS6A02G334000.1	4.3754e-05	0.00600044	0.55298	0.135312	5.98236	0.104809	0.00382677	12DAA	WT vs nam-a1
464	TraesCS6B02G192200.1	4.43168e-05	0.00606452	0.478098	0.117074	7.50822	0.0574288	0.000668935	12DAA	WT vs nam-a1
465	TraesCS2A02G432800.1	4.46541e-05	0.00609754	0.720205	0.176435	4.2528	0.149114	0.0194659	12DAA	WT vs nam-a1
466	TraesCS2B02G454100.1	4.52738e-05	0.0061689	0.794737	0.194847	5.86912	0.243725	0.00323273	12DAA	WT vs nam-a1
467	TraesCS3A02G269200.1	4.54022e-05	0.00617315	-0.743189	0.182238	4.44476	0.169342	0.0166198	12DAA	WT vs nam-a1
468	TraesCS1A02G194900.1	4.6145e-05	0.00626073	0.624847	0.153361	5.08759	0.16628	0.00879016	12DAA	WT vs nam-a1
469	TraesCS4A02G019800.1	4.64255e-05	0.00628536	1.32333	0.32491	3.63082	0.535555	0.0524687	12DAA	WT vs nam-a1
470	TraesCS2B02G224200.1	4.68093e-05	0.00632384	-0.709208	0.174209	4.28297	0.333942	0.0152514	12DAA	WT vs nam-a1
471	TraesCS5A02G261300.1	4.75303e-05	0.00640761	0.571129	0.140415	4.96077	0.0809088	0.00786255	12DAA	WT vs nam-a1
472	TraesCS5B02G235700.1	5.00936e-05	0.00672462	0.784374	0.193425	5.11184	0.242314	0.00728776	12DAA	WT vs nam-a1
473	TraesCS3A02G035800LC.1	5.0071e-05	0.00672462	1.73519	0.427884	3.1491	0.971747	0.127669	12DAA	WT vs nam-a1
474	TraesCS2B02G205900LC.1	5.04278e-05	0.0067552	-1.33785	0.330038	7.29799	0.533587	0.000736702	12DAA	WT vs nam-a1
475	TraesCS5B02G243100.2	5.07323e-05	0.00678168	1.02759	0.253588	6.15113	0.322861	0.0124221	12DAA	WT vs nam-a1
476	TraesCS1A02G356800.1	5.09861e-05	0.00680128	-1.11683	0.275688	3.00309	0.337929	0.0538377	12DAA	WT vs nam-a1
477	TraesCS7B02G349800.1	5.11928e-05	0.00681454	1.2771	0.315326	4.7063	0.606184	0.0172053	12DAA	WT vs nam-a1
478	TraesCSU02G252400LC.1	5.13799e-05	0.00682514	2.3065	0.569611	1.80439	2.05968	0.227236	12DAA	WT vs nam-a1
479	TraesCS3A02G287500.1	5.15069e-05	0.00682773	1.32726	0.327824	4.76337	0.964543	0.0153206	12DAA	WT vs nam-a1
480	TraesCS4A02G485000.3	5.23739e-05	0.00692819	1.34072	0.33147	7.75758	0.522561	0.00286179	12DAA	WT vs nam-a1
481	TraesCSU02G656900LC.1	5.47956e-05	0.00723348	1.5677	0.388607	4.26315	0.855901	0.234587	12DAA	WT vs nam-a1
482	TraesCS5A02G238000.1	5.57369e-05	0.00734247	0.725223	0.179949	4.99598	0.276464	0.0119237	12DAA	WT vs nam-a1
483	TraesCS6A02G328700.1	5.68013e-05	0.0074672	1.04879	0.260522	3.72409	0.49551	0.0434993	12DAA	WT vs nam-a1
484	TraesCS5A02G577410LC.1	5.85314e-05	0.00767875	2.75513	0.685584	1.3936	2.21643	0.123889	12DAA	WT vs nam-a1
485	TraesCS4B02G198000.1	6.02863e-05	0.00789265	-0.637798	0.158985	5.34542	0.408626	0.00468541	12DAA	WT vs nam-a1
486	TraesCS2A02G293400LC.1	6.08429e-05	0.00794914	-1.24644	0.31087	3.32357	0.443867	0.0579427	12DAA	WT vs nam-a1
487	TraesCS5B02G278600.1	6.10904e-05	0.00796509	-0.536491	0.133836	6.85433	0.0905674	0.0114006	12DAA	WT vs nam-a1
488	TraesCS3A02G074600.1	6.1735e-05	0.00803264	-0.633804	0.158211	9.00091	0.132332	0.000153568	12DAA	WT vs nam-a1
489	TraesCS2B02G006600.1	6.20853e-05	0.00804524	2.66506	0.665476	1.91152	2.08996	0.243039	12DAA	WT vs nam-a1
490	TraesCS4A02G020500.1	6.20159e-05	0.00804524	1.44273	0.360233	2.68555	0.680929	0.12029	12DAA	WT vs nam-a1
491	TraesCS4B02G082300.1	6.32813e-05	0.00818353	0.851368	0.21283	4.50552	0.330753	0.0141929	12DAA	WT vs nam-a1
492	TraesCS5A02G391900.1	6.40006e-05	0.00825972	-0.570348	0.142674	5.22853	0.115778	0.00540105	12DAA	WT vs nam-a1
493	TraesCS3B02G510100.1	6.44103e-05	0.00829573	-0.730283	0.182752	4.09665	0.152647	0.021024	12DAA	WT vs nam-a1
494	TraesCS2B02G564200.1	6.51105e-05	0.00836894	-1.09141	0.273297	4.95634	0.515653	0.00861049	12DAA	WT vs nam-a1
495	TraesCS3B02G258400.1	6.54927e-05	0.00840106	-0.699649	0.175259	4.91424	0.145665	0.0100465	12DAA	WT vs nam-a1
496	TraesCS5A02G097300LC.1	6.72622e-05	0.00861065	-0.888234	0.222851	4.88952	0.229646	0.0116788	12DAA	WT vs nam-a1
497	TraesCS7A02G364700LC.1	6.78282e-05	0.00866563	0.449179	0.112752	6.93786	0.0652186	0.000791774	12DAA	WT vs nam-a1
498	TraesCS1A02G018500.1	6.81245e-05	0.00867912	-0.636358	0.159779	7.53512	0.149303	0.00069004	12DAA	WT vs nam-a1
499	TraesCS7B02G325100.1	6.82072e-05	0.00867912	-0.918582	0.230657	3.80599	0.241523	0.0356456	12DAA	WT vs nam-a1
500	TraesCS4B02G338400.1	6.84973e-05	0.0086986	-2.17892	0.547268	1.74222	1.91641	0.140575	12DAA	WT vs nam-a1
501	TraesCS1B02G020600.1	7.21171e-05	0.00914002	-0.516127	0.130033	6.57731	0.103751	0.00182811	12DAA	WT vs nam-a1
502	TraesCS4B02G363100.2	7.3606e-05	0.00931014	0.711111	0.179378	5.97956	0.145258	0.010884	12DAA	WT vs nam-a1
503	TraesCS6B02G700800LC.1	7.39071e-05	0.00932963	0.595495	0.150251	5.23493	0.164831	0.0164402	12DAA	WT vs nam-a1
504	TraesCS1A02G066900.1	7.45742e-05	0.00939517	0.735432	0.185659	8.09655	0.194216	0.000446977	12DAA	WT vs nam-a1
505	TraesCS7A02G194500.1	7.74244e-05	0.00973493	1.43102	0.362078	3.84596	0.587446	0.0311037	12DAA	WT vs nam-a1
506	TraesCS2A02G121200.1	7.82271e-05	0.00979705	-0.461129	0.116748	7.0713	0.104262	0.00223997	12DAA	WT vs nam-a1
507	TraesCS7A02G453100.1	7.8077e-05	0.00979705	-1.70777	0.432321	5.97736	0.891675	0.00437851	12DAA	WT vs nam-a1
508	TraesCS5B02G017300.1	7.95296e-05	0.00994057	0.536338	0.135926	5.06511	0.0735114	0.00655526	12DAA	WT vs nam-a1
509	TraesCS4B02G291800.1	8.01321e-05	0.0099962	-2.3165	0.587346	3.19989	2.05328	0.117502	12DAA	WT vs nam-a1
510	TraesCS4A02G441900.1	8.08265e-05	0.0100631	-0.959453	0.243396	7.38322	0.469894	0.000771588	12DAA	WT vs nam-a1
511	TraesCS2B02G000300.1	8.18119e-05	0.010146	-2.704	0.686463	1.36197	2.10189	0.17484	12DAA	WT vs nam-a1
512	TraesCS7B02G293600LC.1	8.17678e-05	0.010146	-1.68103	0.426749	2.93886	0.836724	0.16148	12DAA	WT vs nam-a1
513	TraesCS3A02G175300.1	8.29971e-05	0.0102729	-0.885932	0.225109	4.18846	0.459974	0.0270105	12DAA	WT vs nam-a1
514	TraesCS3B02G182400.1	8.43751e-05	0.0104187	2.13241	0.542373	2.03314	1.32192	0.277142	12DAA	WT vs nam-a1
515	TraesCS5A02G122100.1	8.45035e-05	0.0104187	-0.502204	0.127746	6.1964	0.0954125	0.00880189	12DAA	WT vs nam-a1
516	TraesCS2B02G029800.1	8.50025e-05	0.0104599	-2.69105	0.684773	1.36533	1.84972	0.173707	12DAA	WT vs nam-a1
517	TraesCS1B02G475000.2	8.61469e-05	0.0105802	4.42689	1.1274	1.41945	4.90822	1.83215	12DAA	WT vs nam-a1
518	TraesCS1A02G165300.1	8.63335e-05	0.0105827	-0.611225	0.155682	5.5479	0.11507	0.00454138	12DAA	WT vs nam-a1
519	TraesCS5A02G552510LC.1	8.78966e-05	0.0107535	-1.03173	0.263077	7.04167	0.325523	0.00122466	12DAA	WT vs nam-a1
520	TraesCS4A02G411000.1	8.98865e-05	0.0109634	0.619418	0.158161	8.08998	0.117345	0.000337809	12DAA	WT vs nam-a1
521	TraesCS4A02G459400.1	8.99684e-05	0.0109634	0.969956	0.24768	4.01944	0.274955	0.075247	12DAA	WT vs nam-a1
522	TraesCS7A02G338900.2	9.01302e-05	0.0109634	0.708585	0.180958	7.85266	0.145417	0.00117804	12DAA	WT vs nam-a1
523	TraesCS2B02G545300.1	9.09889e-05	0.0110467	2.21414	0.565779	2.21495	1.43731	0.202481	12DAA	WT vs nam-a1
524	TraesCS1A02G036300.1	9.16458e-05	0.0110841	-1.767	0.451722	4.03349	1.02011	0.0304961	12DAA	WT vs nam-a1
525	TraesCS7A02G096100.1	9.15029e-05	0.0110841	0.686244	0.175417	4.28	0.171635	0.0156	12DAA	WT vs nam-a1
526	TraesCS3B02G068000.3	9.18805e-05	0.0110913	-4.46176	1.1408	1.97428	5.66299	2.26656	12DAA	WT vs nam-a1
527	TraesCS3B02G502100.1	9.22724e-05	0.0111175	-0.648027	0.165733	5.234	0.17997	0.00514106	12DAA	WT vs nam-a1
528	TraesCS5A02G314700.1	9.51136e-05	0.0114204	0.59529	0.152532	6.81042	0.102802	0.00180403	12DAA	WT vs nam-a1
529	TraesCS7A02G016710LC.1	9.51462e-05	0.0114204	-1.41291	0.362038	5.10118	0.580446	0.00741671	12DAA	WT vs nam-a1
530	TraesCS5B02G239700.1	9.55566e-05	0.011448	1.00167	0.256734	5.69012	0.574956	0.00486883	12DAA	WT vs nam-a1
531	TraesCS1B02G281400.1	9.61636e-05	0.0114991	-0.975483	0.250119	3.93628	0.303182	0.0213623	12DAA	WT vs nam-a1
532	TraesCS4A02G321400.1	9.67747e-05	0.0115504	-0.458261	0.117547	6.04103	0.0656439	0.00355202	12DAA	WT vs nam-a1
533	TraesCS1B02G119100.1	9.70375e-05	0.01156	-0.598963	0.153664	6.75665	0.159505	0.00158939	12DAA	WT vs nam-a1
534	TraesCS4A02G091000LC.1	9.78021e-05	0.0116293	-0.568305	0.14587	6.31698	0.0982732	0.00231492	12DAA	WT vs nam-a1
535	TraesCS5A02G162100.1	9.81515e-05	0.011649	-0.564623	0.144957	5.58029	0.110126	0.00546824	12DAA	WT vs nam-a1
536	TraesCS2B02G531100.1	9.91998e-05	0.0117515	-1.10862	0.284806	5.0613	0.509246	0.00936556	12DAA	WT vs nam-a1
537	TraesCS7B02G466000LC.1	0.000100531	0.011887	1.31536	0.338199	3.72531	0.556021	0.0303278	12DAA	WT vs nam-a1
538	TraesCS5B02G062500.1	0.00010135	0.0119616	0.442474	0.113824	6.55909	0.0603991	0.00203406	12DAA	WT vs nam-a1
539	TraesCS3B02G453800.1	0.00010265	0.0120925	0.5894	0.151741	5.82758	0.169031	0.00520136	12DAA	WT vs nam-a1
540	TraesCS7A02G158400.1	0.000103126	0.0121261	-0.786869	0.202638	4.38767	0.24161	0.0136652	12DAA	WT vs nam-a1
541	TraesCS5A02G391500.1	0.000103495	0.012147	1.81094	0.466467	5.20083	1.99749	0.0192393	12DAA	WT vs nam-a1
542	TraesCS5B02G486300LC.3	0.000105581	0.0123689	-0.862686	0.222491	4.6882	0.235666	0.0242248	12DAA	WT vs nam-a1
543	TraesCS6B02G429500.1	0.000107268	0.0125435	0.769081	0.198548	7.41414	0.228065	0.000667242	12DAA	WT vs nam-a1
544	TraesCS2A02G517600.1	0.000107563	0.0125548	1.09169	0.281882	3.47139	0.375997	0.0489814	12DAA	WT vs nam-a1
545	TraesCS6B02G309800.1	0.000108702	0.0126609	0.727172	0.187885	5.92682	0.157373	0.00415747	12DAA	WT vs nam-a1
546	TraesCS7A02G654500LC.1	0.000108871	0.0126609	2.16434	0.559272	1.80722	1.36088	0.205494	12DAA	WT vs nam-a1
547	TraesCS6A02G089200LC.1	0.000109802	0.0127459	-0.817224	0.211287	3.70281	0.255712	0.0320999	12DAA	WT vs nam-a1
548	TraesCS7B02G493000.1	0.000110142	0.012762	-0.472296	0.122132	6.65859	0.0793257	0.00208231	12DAA	WT vs nam-a1
549	TraesCS2A02G362200.1	0.000110746	0.0128086	0.528938	0.136827	5.77718	0.16254	0.00539346	12DAA	WT vs nam-a1
550	TraesCS2B02G358500.1	0.000112562	0.012995	-0.773188	0.200215	4.75526	0.250667	0.0101171	12DAA	WT vs nam-a1
551	TraesCS3A02G231900.1	0.00011377	0.0130632	0.563658	0.146057	6.73282	0.0943189	0.0012912	12DAA	WT vs nam-a1
552	TraesCS7A02G410400.1	0.000113621	0.0130632	1.33603	0.346167	4.02165	0.668498	0.152574	12DAA	WT vs nam-a1
553	TraesCS2A02G435300LC.1	0.000113458	0.0130632	-1.11757	0.289539	3.56777	0.36514	0.0308412	12DAA	WT vs nam-a1
554	TraesCS2B02G006800.1	0.000115815	0.0132515	1.57833	0.409444	4.99921	0.74207	0.304164	12DAA	WT vs nam-a1
555	TraesCS5B02G069200.3	0.00011588	0.0132515	-5.2854	1.37116	2.4425	7.75254	3.57479	12DAA	WT vs nam-a1
556	TraesCS7A02G094800.2	0.000116037	0.0132515	1.54508	0.400866	4.36086	0.717535	0.200498	12DAA	WT vs nam-a1
557	TraesCS4A02G336400.4	0.000117573	0.0134029	1.21704	0.316023	6.03045	0.398327	0.175635	12DAA	WT vs nam-a1
558	TraesCS5B02G315600.1	0.000118126	0.0134177	0.757539	0.196764	5.11324	0.184752	0.0238982	12DAA	WT vs nam-a1
559	TraesCS7B02G651000LC.1	0.000118052	0.0134177	0.863374	0.224245	3.51294	0.181657	0.0356863	12DAA	WT vs nam-a1
560	TraesCS4A02G101800.1	0.000119123	0.0135069	0.589769	0.153269	5.47225	0.114083	0.00517313	12DAA	WT vs nam-a1
561	TraesCS3B02G371200.1	0.00012045	0.0136322	-0.804889	0.209323	4.9069	0.243692	0.0103056	12DAA	WT vs nam-a1
562	TraesCS1B02G091400LC.1	0.000120658	0.0136322	1.00815	0.262213	3.18194	0.440459	0.0545863	12DAA	WT vs nam-a1
563	TraesCS7B02G197800.1	0.000122141	0.0137752	0.678474	0.176604	5.77017	0.181422	0.00468006	12DAA	WT vs nam-a1
564	TraesCS2A02G009800.1	0.000126317	0.014221	2.31826	0.604732	2.17076	1.97433	0.212717	12DAA	WT vs nam-a1
565	TraesCS2B02G360300.1	0.000127206	0.0142957	-0.734914	0.191793	6.15564	0.222124	0.00239857	12DAA	WT vs nam-a1
566	TraesCS7A02G402300.1	0.000128737	0.0144422	4.84544	1.2655	1.91283	6.89057	2.52469	12DAA	WT vs nam-a1
567	TraesCS3A02G108700.1	0.000131068	0.0146262	0.430863	0.11266	6.76451	0.0707371	0.00116131	12DAA	WT vs nam-a1
568	TraesCS4A02G486100.1	0.000130764	0.0146262	-1.38938	0.363236	3.12771	0.901888	0.0587009	12DAA	WT vs nam-a1
569	TraesCS1B02G198100LC.1	0.000130952	0.0146262	-0.859996	0.224855	3.54298	0.234189	0.0375185	12DAA	WT vs nam-a1
570	TraesCS2A02G570700.1	0.00013334	0.0148276	-1.24143	0.324965	4.95969	0.711062	0.00901294	12DAA	WT vs nam-a1
571	TraesCS7B02G293500LC.1	0.000133161	0.0148276	-1.43984	0.376868	2.85838	0.613389	0.0877358	12DAA	WT vs nam-a1
572	TraesCS5A02G160100.2	0.000135161	0.0150038	-0.432251	0.113248	6.5934	0.0763987	0.00172858	12DAA	WT vs nam-a1
573	TraesCS7A02G281200.1	0.000137618	0.0152499	-0.505859	0.132687	6.08753	0.0770161	0.00241415	12DAA	WT vs nam-a1
574	TraesCS5B02G208200.1	0.000138881	0.0153631	1.36915	0.359343	3.12419	0.582869	0.0703416	12DAA	WT vs nam-a1
575	TraesCS3B02G218500.2	0.000141352	0.0156092	-0.431945	0.113497	6.39473	0.0656094	0.00200278	12DAA	WT vs nam-a1
576	TraesCS1A02G362100LC.1	0.000141699	0.0156203	0.497548	0.130755	5.34996	0.0670634	0.00649171	12DAA	WT vs nam-a1
577	TraesCS3A02G156800.1	0.000142955	0.0157315	0.722743	0.190045	7.22315	0.241273	0.00103164	12DAA	WT vs nam-a1
578	TraesCS4A02G253700.2	0.000144937	0.0158945	-2.56778	0.675806	2.58824	2.84721	0.405631	12DAA	WT vs nam-a1
579	TraesCS1B02G171200LC.1	0.000144738	0.0158945	0.736916	0.193929	3.86859	0.201656	0.0238455	12DAA	WT vs nam-a1
580	TraesCS2A02G523700.1	0.000145213	0.0158973	0.501127	0.131906	8.54322	0.122585	0.000234883	12DAA	WT vs nam-a1
581	TraesCS1B02G040800.1	0.000147719	0.0161438	-1.26527	0.333416	3.57054	0.875153	0.159881	12DAA	WT vs nam-a1
582	TraesCS2B02G359400.1	0.000148413	0.0161918	1.38819	0.365919	4.71941	0.632903	0.015203	12DAA	WT vs nam-a1
583	TraesCS6A02G272800.1	0.000148753	0.0162011	4.15065	1.09425	3.3557	5.97957	1.09183	12DAA	WT vs nam-a1
584	TraesCS5A02G186500.2	0.000149353	0.0162386	-4.24586	1.11965	3.19573	5.98485	1.55954	12DAA	WT vs nam-a1
585	TraesCS2B02G485100.1	0.000150561	0.0163419	0.482588	0.127327	5.51662	0.0841685	0.00599133	12DAA	WT vs nam-a1
586	TraesCS1A02G119800.1	0.000151847	0.0164534	-0.594644	0.15698	5.20004	0.115305	0.00721531	12DAA	WT vs nam-a1
587	TraesCS4B02G133100LC.1	0.000152491	0.016495	0.656461	0.173347	4.26445	0.131111	0.0175151	12DAA	WT vs nam-a1
588	TraesCS3A02G179400.1	0.000152905	0.0165117	0.806557	0.21302	4.14344	0.289097	0.024816	12DAA	WT vs nam-a1
589	TraesCS5B02G431200.1	0.000153237	0.0165194	2.77219	0.732268	2.61852	2.68605	0.921995	12DAA	WT vs nam-a1
590	TraesCS3B02G207000.1	0.000154408	0.0165893	-1.59581	0.421741	2.52822	1.28473	0.188449	12DAA	WT vs nam-a1
591	TraesCS5B02G289200.2	0.000154237	0.0165893	-0.794158	0.209864	4.65139	0.196569	0.0263206	12DAA	WT vs nam-a1
592	TraesCS3B02G044600.1	0.000154835	0.0166071	0.691955	0.182903	4.00229	0.136177	0.0190658	12DAA	WT vs nam-a1
593	TraesCSU02G401100LC.1	0.000155944	0.0166979	1.96473	0.519577	2.15918	1.06983	0.275777	12DAA	WT vs nam-a1
594	TraesCS7A02G235300.2	0.000157082	0.016765	-0.970531	0.256782	4.68319	0.405132	0.0347026	12DAA	WT vs nam-a1
595	TraesCS2B02G142100LC.1	0.000157099	0.016765	2.22988	0.589982	2.3638	2.16077	0.106506	12DAA	WT vs nam-a1
596	TraesCS6A02G369900.1	0.000158017	0.0168346	1.01936	0.269807	4.32089	0.39434	0.0190671	12DAA	WT vs nam-a1
597	TraesCS2B02G006500.1	0.000158668	0.0168757	2.17516	0.575883	3.83718	1.12575	0.610945	12DAA	WT vs nam-a1
598	TraesCS2A02G121200.2	0.000160575	0.01705	-0.467474	0.123863	7.5744	0.116902	0.00107333	12DAA	WT vs nam-a1
599	TraesCS3A02G535100.1	0.000163165	0.017296	1.45389	0.385633	6.6017	1.09179	0.0024633	12DAA	WT vs nam-a1
600	TraesCS7B02G539910LC.1	0.000163995	0.0173551	-2.56278	0.679989	1.36214	1.6076	0.157333	12DAA	WT vs nam-a1
601	TraesCS5A02G249400.1	0.000165881	0.0175254	-0.570114	0.151384	5.81306	0.167995	0.00340289	12DAA	WT vs nam-a1
602	TraesCS6A02G299300.1	0.000166373	0.0175482	0.856412	0.227451	5.99936	0.276587	0.00349465	12DAA	WT vs nam-a1
603	TraesCS1B02G459100.1	0.000166877	0.0175722	0.991672	0.263427	3.17863	0.322089	0.055628	12DAA	WT vs nam-a1
604	TraesCS1B02G410800.2	0.000171844	0.0179464	0.488495	0.130017	5.52899	0.0684011	0.00746025	12DAA	WT vs nam-a1
605	TraesCS3B02G520300.1	0.000171258	0.0179464	-0.530406	0.141139	4.94013	0.129183	0.00802483	12DAA	WT vs nam-a1
606	TraesCS4B02G129600.1	0.000171481	0.0179464	-0.490904	0.130639	6.03431	0.0742115	0.00345101	12DAA	WT vs nam-a1
607	TraesCS7A02G344200.1	0.000171652	0.0179464	-0.515443	0.137179	5.13156	0.0934146	0.00534109	12DAA	WT vs nam-a1
608	TraesCS2A02G410400LC.1	0.000171598	0.0179464	0.582306	0.15497	6.01942	0.127473	0.00310118	12DAA	WT vs nam-a1
609	TraesCS3B02G380600.1	0.000172492	0.0179845	-0.651854	0.173539	4.23481	0.10324	0.0171129	12DAA	WT vs nam-a1
610	TraesCS2B02G489600.2	0.000178016	0.01853	-0.468312	0.124939	7.99898	0.133483	0.00158444	12DAA	WT vs nam-a1
611	TraesCS5B02G195500.1	0.000181381	0.0188493	-0.706155	0.188628	5.55044	0.153517	0.00399793	12DAA	WT vs nam-a1
612	TraesCS5A02G395100.1	0.000182602	0.0189453	-0.448577	0.119878	6.40395	0.073577	0.00497873	12DAA	WT vs nam-a1
613	TraesCS3B02G470700.1	0.000185247	0.0191883	-0.598531	0.160107	5.22462	0.116294	0.00666622	12DAA	WT vs nam-a1
614	TraesCS1A02G333800.1	0.000187071	0.0193457	0.565954	0.151492	4.84277	0.0984771	0.0092266	12DAA	WT vs nam-a1
615	TraesCS7B02G128800.1	0.00019014	0.0196311	1.41448	0.379039	3.85156	0.601676	0.0318876	12DAA	WT vs nam-a1
616	TraesCS2A02G001300.1	0.000191442	0.0197014	-0.83061	0.222681	3.58546	0.17115	0.0373348	12DAA	WT vs nam-a1
617	TraesCS7A02G137000.1	0.000191293	0.0197014	0.966943	0.259217	8.37391	0.298481	0.000738219	12DAA	WT vs nam-a1
618	TraesCS1A02G281000.1	0.000194233	0.0199563	-0.755675	0.20279	6.22176	0.174021	0.0374655	12DAA	WT vs nam-a1
619	TraesCS4B02G419000LC.1	0.000197818	0.0202918	0.637211	0.171211	5.10026	0.177034	0.00806489	12DAA	WT vs nam-a1
620	TraesCS5A02G215900.1	0.000201057	0.0205246	0.583495	0.156951	5.87503	0.1588	0.00367269	12DAA	WT vs nam-a1
621	TraesCS5A02G544400.1	0.000200605	0.0205246	-2.5553	0.687231	1.85635	2.43912	0.551233	12DAA	WT vs nam-a1
622	TraesCS3B02G639300LC.1	0.000200791	0.0205246	-1.3266	0.356803	2.79368	0.532305	0.13138	12DAA	WT vs nam-a1
623	TraesCS6B02G322200.1	0.000202898	0.0206794	-2.2797	0.613585	1.57004	1.70631	0.174364	12DAA	WT vs nam-a1
624	TraesCS1A02G276200LC.1	0.000205239	0.0208844	0.427407	0.115127	6.07788	0.0556989	0.00250024	12DAA	WT vs nam-a1
625	TraesCS1B02G232300.1	0.000206929	0.0210227	0.472957	0.127468	7.04463	0.0828851	0.00106619	12DAA	WT vs nam-a1
626	TraesCS5A02G468800.1	0.000207931	0.0210907	0.419282	0.113039	6.65999	0.0530847	0.00153181	12DAA	WT vs nam-a1
627	TraesCS7A02G377900.1	0.000210156	0.0212824	-0.987972	0.266552	3.13054	0.281311	0.0553479	12DAA	WT vs nam-a1
628	TraesCS3B02G062700.1	0.000211768	0.0214115	1.0149	0.273959	5.49123	0.329605	0.0065396	12DAA	WT vs nam-a1
629	TraesCS4B02G134500.1	0.000212186	0.0214197	-0.56606	0.152822	4.84137	0.10877	0.0104196	12DAA	WT vs nam-a1
630	TraesCS1A02G210600.1	0.000215215	0.0216909	0.430704	0.116392	6.20882	0.0599667	0.00271023	12DAA	WT vs nam-a1
631	TraesCS2B02G039200.1	0.000216493	0.0217851	-1.81712	0.491253	2.07058	0.838069	0.186349	12DAA	WT vs nam-a1
632	TraesCS4A02G464100.1	0.000217732	0.0218752	1.46677	0.396692	2.95024	0.745385	0.110843	12DAA	WT vs nam-a1
633	TraesCS3A02G582200LC.1	0.000220777	0.0221461	0.868844	0.235206	3.90776	0.234248	0.0262749	12DAA	WT vs nam-a1
634	TraesCS2A02G173500.1	0.000223174	0.0223512	-0.813625	0.220421	5.49229	0.200118	0.00513999	12DAA	WT vs nam-a1
635	TraesCS1A02G396300LC.1	0.000224813	0.0224799	0.967376	0.262207	5.78219	0.303409	0.00405289	12DAA	WT vs nam-a1
636	TraesCS4B02G168900.3	0.000225513	0.0225145	1.70583	0.462464	2.74837	0.862121	0.298089	12DAA	WT vs nam-a1
637	TraesCS2B02G435900.1	0.000226666	0.022594	-1.39366	0.377964	4.14265	0.716414	0.0380016	12DAA	WT vs nam-a1
638	TraesCSU02G251500.1	0.000228149	0.0227062	1.23618	0.335406	4.08729	0.4699	0.0332966	12DAA	WT vs nam-a1
639	TraesCS2A02G031500.1	0.00023051	0.0229053	-1.37764	0.374054	3.02923	0.660931	0.0879833	12DAA	WT vs nam-a1
640	TraesCS4A02G507800LC.1	0.000231122	0.022917	-2.80728	0.762366	1.5124	2.00031	0.536708	12DAA	WT vs nam-a1
641	TraesCS4B02G490900LC.1	0.00023135	0.022917	-0.681518	0.185091	3.94045	0.142445	0.0191475	12DAA	WT vs nam-a1
642	TraesCS3A02G037600.1	0.000231856	0.0229314	-0.514521	0.139758	5.45674	0.0804686	0.00455228	12DAA	WT vs nam-a1
643	TraesCS2B02G240700LC.1	0.000234268	0.0231338	-1.41091	0.383517	2.5397	0.716592	0.129151	12DAA	WT vs nam-a1
644	TraesCS1B02G360700.2	0.000235686	0.0232377	-3.59092	0.976501	3.37506	6.45664	0.974671	12DAA	WT vs nam-a1
645	TraesCS3B02G293100.5	0.000239668	0.0235937	0.887706	0.24168	5.74311	0.230652	0.0917177	12DAA	WT vs nam-a1
646	TraesCS3A02G469300LC.1	0.000240784	0.0236669	3.13543	0.853905	1.7699	3.24024	0.0913772	12DAA	WT vs nam-a1
647	TraesCS3A02G516200LC.1	0.000246174	0.0241593	-3.5135	0.958346	1.63472	4.45903	0.0356183	12DAA	WT vs nam-a1
648	TraesCS2B02G225300.2	0.000247818	0.0242429	-3.90766	1.06635	2.82652	4.67607	2.15539	12DAA	WT vs nam-a1
649	TraesCS6A02G084100.1	0.000248172	0.0242429	-1.4164	0.386558	2.75066	0.535482	0.169532	12DAA	WT vs nam-a1
650	TraesCS4A02G744600LC.1	0.000247785	0.0242429	-0.879007	0.239868	3.62445	0.244542	0.0496364	12DAA	WT vs nam-a1
651	TraesCS4B02G102500.1	0.000251145	0.0244957	0.542073	0.148063	6.03963	0.207165	0.00320843	12DAA	WT vs nam-a1
652	TraesCS7B02G239700.4	0.000254262	0.0247617	-4.0516	1.10762	3.41938	6.27689	1.41893	12DAA	WT vs nam-a1
653	TraesCS1B02G022300.1	0.000256487	0.0249401	-0.53207	0.145546	9.17284	0.118219	0.000113449	12DAA	WT vs nam-a1
654	TraesCS5A02G187100.2	0.000258379	0.025069	2.9539	0.808445	2.15191	2.6692	0.65815	12DAA	WT vs nam-a1
655	TraesCS5B02G028500.1	0.000258602	0.025069	1.10134	0.301441	3.83519	0.385188	0.0988276	12DAA	WT vs nam-a1
656	TraesCS2A02G003100.1	0.000261164	0.0252403	0.578677	0.158496	4.66324	0.143805	0.0131224	12DAA	WT vs nam-a1
657	TraesCS2A02G337300.1	0.000261022	0.0252403	-0.432707	0.118511	7.24765	0.0619804	0.0024613	12DAA	WT vs nam-a1
658	TraesCS5A02G272200.1	0.000261665	0.0252503	1.20584	0.330315	4.31706	0.477112	0.0215997	12DAA	WT vs nam-a1
659	TraesCS6B02G429700.1	0.000262545	0.0252967	2.99778	0.821376	1.5553	3.48025	0.287897	12DAA	WT vs nam-a1
660	TraesCS2B02G160900.1	0.000264524	0.0254488	-0.895227	0.245417	6.0631	0.267508	0.00297194	12DAA	WT vs nam-a1
661	TraesCS4B02G304800.1	0.000265404	0.0254948	2.36328	0.648022	1.99247	2.42208	0.369935	12DAA	WT vs nam-a1
662	TraesCS7B02G168300.2	0.000266325	0.0255061	0.783721	0.214952	5.39057	0.237768	0.0116408	12DAA	WT vs nam-a1
663	TraesCS3A02G199000LC.1	0.000265946	0.0255061	2.33139	0.639369	2.45651	1.68263	0.131012	12DAA	WT vs nam-a1
664	TraesCS2B02G443800.2	0.000268977	0.0257213	1.5934	0.437329	3.88093	1.05258	0.331505	12DAA	WT vs nam-a1
665	TraesCS1B02G635400LC.1	0.000270367	0.0258154	-0.689777	0.189387	3.98681	0.122182	0.0235258	12DAA	WT vs nam-a1
666	TraesCS2B02G388800.1	0.000270878	0.0258253	-0.746332	0.204942	3.7728	0.34245	0.0294863	12DAA	WT vs nam-a1
667	TraesCS3B02G175800.1	0.000273952	0.0260792	-1.35364	0.372006	2.84771	0.713212	0.0931777	12DAA	WT vs nam-a1
668	TraesCS2A02G700500LC.1	0.00027504	0.0261436	0.864388	0.237617	3.49255	0.169592	0.0471453	12DAA	WT vs nam-a1
669	TraesCS3A02G312100.1	0.000276107	0.0262058	0.59644	0.164004	8.07811	0.150284	0.000334279	12DAA	WT vs nam-a1
670	TraesCS6B02G290500.1	0.000277128	0.0262635	1.73729	0.47783	4.39985	0.973052	0.0257372	12DAA	WT vs nam-a1
671	TraesCS1A02G218800.1	0.000281045	0.0265648	0.412966	0.113697	7.01885	0.0511256	0.000992687	12DAA	WT vs nam-a1
672	TraesCS2B02G511200.1	0.000281144	0.0265648	0.706342	0.194473	5.70931	0.219323	0.00582899	12DAA	WT vs nam-a1
673	TraesCS5B02G083600.1	0.000282699	0.026672	-0.834055	0.229726	6.56221	0.379425	0.00208415	12DAA	WT vs nam-a1
674	TraesCS3A02G415900.1	0.000284213	0.0267751	-0.589707	0.162486	4.99094	0.159897	0.00733726	12DAA	WT vs nam-a1
675	TraesCS4A02G048300.1	0.000286933	0.0269682	1.06821	0.294531	4.72527	0.385941	0.012862	12DAA	WT vs nam-a1
676	TraesCS4B02G112000.1	0.000287112	0.0269682	0.466673	0.128679	8.39098	0.123592	0.000294153	12DAA	WT vs nam-a1
677	TraesCS3A02G331100LC.4	0.000287633	0.0269772	4.42077	1.21912	1.44477	5.04591	2.28661	12DAA	WT vs nam-a1
678	TraesCS1A02G125500.1	0.000288223	0.0269926	0.984983	0.27167	5.62507	0.355726	0.0050453	12DAA	WT vs nam-a1
679	TraesCS2A02G172500.1	0.000290166	0.0271346	0.424785	0.117217	6.09378	0.0553992	0.00262143	12DAA	WT vs nam-a1
680	TraesCSU02G186800.2	0.000290712	0.0271457	4.60344	1.27046	2.80881	6.60378	2.80213	12DAA	WT vs nam-a1
681	TraesCS3A02G522300.1	0.000291147	0.0271464	0.829729	0.229014	5.41413	0.224219	0.0144758	12DAA	WT vs nam-a1
682	TraesCS6B02G181300.1	0.000292178	0.0272026	-0.725429	0.200277	5.2804	0.188134	0.0460649	12DAA	WT vs nam-a1
683	TraesCS5B02G409500.1	0.000293394	0.0272359	0.780681	0.215594	4.24043	0.214957	0.0184458	12DAA	WT vs nam-a1
684	TraesCS6A02G215700.1	0.000293106	0.0272359	0.682067	0.188348	5.88277	0.143892	0.00317427	12DAA	WT vs nam-a1
685	TraesCS3A02G172000.1	0.000293951	0.0272478	-0.412478	0.113926	6.89859	0.0676421	0.00142595	12DAA	WT vs nam-a1
686	TraesCS5A02G484800.1	0.000294466	0.0272557	-1.05782	0.292205	5.99222	0.395764	0.00258543	12DAA	WT vs nam-a1
687	TraesCS6B02G433600.1	0.000295334	0.0272963	-1.03566	0.286144	3.32405	0.354926	0.0445314	12DAA	WT vs nam-a1
688	TraesCS2B02G355500.1	0.000296566	0.0273667	-0.603793	0.166873	4.98307	0.231375	0.00827046	12DAA	WT vs nam-a1
689	TraesCS5A02G488600.1	0.000296958	0.0273667	0.690795	0.190936	5.48605	0.182986	0.00503708	12DAA	WT vs nam-a1
690	TraesCS6A02G338600.1	0.000302372	0.0278252	0.419687	0.116152	7.40482	0.0560396	0.000713631	12DAA	WT vs nam-a1
691	TraesCS7A02G347800.1	0.000303618	0.0278995	-0.671071	0.185779	3.9913	0.143495	0.0207973	12DAA	WT vs nam-a1
692	TraesCS4A02G310100.1	0.000304397	0.0279306	0.408314	0.113058	6.92883	0.077725	0.000954012	12DAA	WT vs nam-a1
693	TraesCS3B02G440500.1	0.000305536	0.0279946	-0.812085	0.224919	3.95216	0.41715	0.0188339	12DAA	WT vs nam-a1
694	TraesCS4B02G611200LC.1	0.000306479	0.0280406	-0.765457	0.212052	3.74824	0.141235	0.0345036	12DAA	WT vs nam-a1
695	TraesCS2A02G160700.1	0.000307844	0.0281249	1.60191	0.443913	3.1586	1.14502	0.125541	12DAA	WT vs nam-a1
696	TraesCS4A02G381600.1	0.000309625	0.0281849	-0.92024	0.255118	3.1766	0.179956	0.046866	12DAA	WT vs nam-a1
697	TraesCS2B02G074300LC.1	0.000309832	0.0281849	-1.40461	0.389418	3.21736	0.670551	0.0700598	12DAA	WT vs nam-a1
698	TraesCS5A02G284800LC.1	0.000309375	0.0281849	-0.75438	0.209125	4.44933	0.233595	0.0123172	12DAA	WT vs nam-a1
699	TraesCS2A02G548100.1	0.000314395	0.0285591	-1.57444	0.436964	3.58903	0.763155	0.0481431	12DAA	WT vs nam-a1
700	TraesCS6B02G050300LC.1	0.000316948	0.0287499	-0.430645	0.119589	6.50481	0.0600975	0.00143428	12DAA	WT vs nam-a1
701	TraesCS1A02G047300.1	0.000318326	0.0288038	-1.05615	0.293383	4.46075	0.445041	0.0130414	12DAA	WT vs nam-a1
702	TraesCS1B02G106300.1	0.00031845	0.0288038	2.569	0.713648	2.40401	1.78787	0.824302	12DAA	WT vs nam-a1
703	TraesCS6B02G139500.1	0.000320554	0.0289118	1.28237	0.356402	3.76387	0.652652	0.0381113	12DAA	WT vs nam-a1
704	TraesCS7A02G126600.1	0.000320192	0.0289118	-1.01054	0.280831	3.38909	0.420391	0.0416493	12DAA	WT vs nam-a1
705	TraesCS5A02G041800.2	0.000325915	0.0293536	0.66838	0.185982	5.32567	0.140837	0.0412726	12DAA	WT vs nam-a1
706	TraesCS5A02G217300.1	0.000327586	0.0294623	-0.980719	0.272995	6.48449	0.463914	0.00168905	12DAA	WT vs nam-a1
707	TraesCS1A02G017900.1	0.000328724	0.0294811	-0.743934	0.207135	7.64319	0.257435	0.000619381	12DAA	WT vs nam-a1
708	TraesCS4B02G221000.1	0.000328363	0.0294811	-1.01351	0.282171	3.05652	0.22697	0.0662321	12DAA	WT vs nam-a1
709	TraesCS2A02G119700.1	0.000329896	0.029503	0.711995	0.198293	5.13912	0.178248	0.00664423	12DAA	WT vs nam-a1
710	TraesCS2A02G374100.1	0.000329779	0.029503	0.428874	0.11944	6.73867	0.126088	0.00436114	12DAA	WT vs nam-a1
711	TraesCS2B02G383600.1	0.0003312	0.0295779	0.592388	0.165029	7.83654	0.195839	0.00146917	12DAA	WT vs nam-a1
712	TraesCS2A02G207600.1	0.000333333	0.0296018	0.705741	0.196699	4.80368	0.183886	0.0086602	12DAA	WT vs nam-a1
713	TraesCS2A02G360800.1	0.000332808	0.0296018	2.23944	0.62409	1.64294	1.16133	0.254784	12DAA	WT vs nam-a1
714	TraesCS6B02G461200.1	0.000333155	0.0296018	0.405855	0.113113	6.74908	0.0517571	0.00139742	12DAA	WT vs nam-a1
715	TraesCS7B02G125300.1	0.000332235	0.0296018	-0.448839	0.125067	5.53231	0.0597997	0.00495786	12DAA	WT vs nam-a1
716	TraesCS5B02G407200.1	0.000336768	0.0298651	-2.12646	0.593115	5.90663	1.48477	0.00504385	12DAA	WT vs nam-a1
717	TraesCS4A02G224300.1	0.000338853	0.0300081	-0.909637	0.253831	4.24341	0.361716	0.0137926	12DAA	WT vs nam-a1
718	TraesCS3B02G194900.1	0.000342319	0.0302307	-1.05618	0.294943	2.95609	0.242974	0.0707888	12DAA	WT vs nam-a1
719	TraesCSU02G124900.1	0.000341905	0.0302307	-1.19367	0.333306	3.55423	1.12112	0.0881539	12DAA	WT vs nam-a1
720	TraesCS1A02G115300LC.1	0.000343384	0.0302826	1.0461	0.292192	3.47073	0.362528	0.103999	12DAA	WT vs nam-a1
721	TraesCS2B02G579000.1	0.000344812	0.0303024	-1.05712	0.29536	4.06643	0.34658	0.0240266	12DAA	WT vs nam-a1
722	TraesCS4A02G105900.2	0.00034504	0.0303024	0.494959	0.138299	6.39012	0.116944	0.00296532	12DAA	WT vs nam-a1
723	TraesCS5B02G287600.1	0.000344488	0.0303024	-0.638185	0.178298	4.91153	0.135226	0.00791636	12DAA	WT vs nam-a1
724	TraesCS5B02G320700.2	0.00034565	0.0303141	0.47676	0.133231	7.56065	0.154285	0.004706	12DAA	WT vs nam-a1
725	TraesCS1A02G391800.1	0.000349457	0.0305021	0.471169	0.131774	5.63747	0.0687805	0.00448661	12DAA	WT vs nam-a1
726	TraesCS2B02G405300.1	0.000348936	0.0305021	-0.622932	0.1742	4.26275	0.132488	0.0180772	12DAA	WT vs nam-a1
727	TraesCS7B02G015400.1	0.000348553	0.0305021	-0.438639	0.122653	5.58141	0.0549977	0.00408325	12DAA	WT vs nam-a1
728	TraesCS2A02G107500LC.1	0.000349715	0.0305021	-0.817599	0.228674	4.04176	0.226594	0.0331685	12DAA	WT vs nam-a1
729	TraesCS2B02G133600.1	0.000352486	0.0307016	-0.814269	0.227875	3.85109	0.210872	0.0270453	12DAA	WT vs nam-a1
730	TraesCS2B02G539100.1	0.000355545	0.0309256	0.649942	0.182003	5.92359	0.183369	0.00404554	12DAA	WT vs nam-a1
731	TraesCS1A02G163700.2	0.00035661	0.0309758	-0.426642	0.119498	5.90545	0.0468572	0.00411254	12DAA	WT vs nam-a1
732	TraesCS1A02G352500.1	0.000358283	0.0310786	0.404699	0.113391	6.66356	0.092963	0.00168525	12DAA	WT vs nam-a1
733	TraesCS1B02G202900.1	0.000364675	0.0315039	-0.593047	0.16638	4.38604	0.118114	0.0144855	12DAA	WT vs nam-a1
734	TraesCS5A02G021600.1	0.000364066	0.0315039	-0.933237	0.261789	3.22826	0.35264	0.0572835	12DAA	WT vs nam-a1
735	TraesCS2B02G396500LC.1	0.000364415	0.0315039	0.904652	0.253788	3.79304	0.300633	0.0429274	12DAA	WT vs nam-a1
736	TraesCS5A02G397500LC.1	0.000365186	0.0315053	-1.68725	0.473409	2.23649	0.900913	0.208918	12DAA	WT vs nam-a1
737	TraesCS4A02G485000.2	0.000366627	0.0315866	1.2788	0.35891	8.73763	0.513009	0.000511425	12DAA	WT vs nam-a1
738	TraesCS5B02G121400LC.1	0.000370932	0.0319142	1.19043	0.334396	6.18556	0.506586	0.00294683	12DAA	WT vs nam-a1
739	TraesCS2B02G161000.1	0.000371847	0.0319497	-0.92278	0.259259	6.25459	0.288865	0.00188265	12DAA	WT vs nam-a1
740	TraesCS5A02G460000.1	0.000374992	0.0321419	-1.81434	0.510064	2.2433	1.27419	0.0959613	12DAA	WT vs nam-a1
741	TraesCS6B02G029000.1	0.000375097	0.0321419	-0.745489	0.209583	4.38921	0.328069	0.017465	12DAA	WT vs nam-a1
742	TraesCS4A02G394300.1	0.000377487	0.0323031	0.887323	0.249575	4.66027	0.295017	0.0154301	12DAA	WT vs nam-a1
743	TraesCS6B02G270000.1	0.000382129	0.0326564	-2.09325	0.589295	5.25003	1.54508	0.00900986	12DAA	WT vs nam-a1
744	TraesCS2A02G122100.1	0.000391924	0.0334484	0.532907	0.150307	5.33119	0.118093	0.00491354	12DAA	WT vs nam-a1
745	TraesCS6B02G507700LC.1	0.000397112	0.0338457	0.521096	0.147119	4.82878	0.0937002	0.0100625	12DAA	WT vs nam-a1
746	TraesCS5A02G501900LC.1	0.000399652	0.0340165	-3.00204	0.847958	1.00979	2.35518	0.201178	12DAA	WT vs nam-a1
747	TraesCS5B02G481900.1	0.00040845	0.0347188	-1.14227	0.323172	3.2423	0.421417	0.056057	12DAA	WT vs nam-a1
748	TraesCS2A02G367700.1	0.000411006	0.0347764	0.908399	0.257124	6.51072	0.275148	0.00203908	12DAA	WT vs nam-a1
749	TraesCS5A02G113100.2	0.000411318	0.0347764	-4.39509	1.24411	1.55151	5.52541	2.50229	12DAA	WT vs nam-a1
750	TraesCS6B02G435100.1	0.00041034	0.0347764	-0.62495	0.176872	5.80544	0.172288	0.0032715	12DAA	WT vs nam-a1
751	TraesCS7A02G303400.1	0.000410403	0.0347764	-0.454956	0.128762	5.51142	0.0658632	0.00484873	12DAA	WT vs nam-a1
752	TraesCS4A02G319200.1	0.000415298	0.0350662	-0.691592	0.195909	5.49415	0.210485	0.00419064	12DAA	WT vs nam-a1
753	TraesCS3A02G244600.1	0.000417886	0.0352379	-0.565639	0.160305	6.27725	0.123894	0.00199303	12DAA	WT vs nam-a1
754	TraesCS2B02G414200.1	0.000418551	0.0352471	-0.433098	0.122757	7.05474	0.0795863	0.00327172	12DAA	WT vs nam-a1
755	TraesCS7A02G189800.1	0.000419588	0.0352876	0.833882	0.236398	3.94518	0.237808	0.0271979	12DAA	WT vs nam-a1
756	TraesCS5A02G517800LC.1	0.00042261	0.0354948	0.424237	0.120332	6.17413	0.144914	0.00208245	12DAA	WT vs nam-a1
757	TraesCS3B02G194400.1	0.00042343	0.0355167	-0.429343	0.121798	6.28496	0.0753728	0.00470405	12DAA	WT vs nam-a1
758	TraesCS7A02G378300.1	0.000431778	0.0361215	-1.08336	0.307786	4.23678	0.370735	0.0672271	12DAA	WT vs nam-a1
759	TraesCS2A02G286600LC.1	0.000431305	0.0361215	-0.966289	0.274502	3.54933	0.297579	0.0440801	12DAA	WT vs nam-a1
760	TraesCS4A02G184700.1	0.000432355	0.0361221	-1.13305	0.321934	4.22137	0.676252	0.0176076	12DAA	WT vs nam-a1
761	TraesCS2A02G185300LC.1	0.000433294	0.036153	0.940554	0.267284	3.23232	0.306439	0.0633615	12DAA	WT vs nam-a1
762	TraesCS1B02G044800.1	0.00043632	0.0363326	-0.785461	0.223328	4.32667	0.235788	0.0177651	12DAA	WT vs nam-a1
763	TraesCS3B02G202800.1	0.00043659	0.0363326	-0.407097	0.115754	6.85339	0.0589898	0.00161986	12DAA	WT vs nam-a1
764	TraesCS6B02G734300LC.1	0.000439229	0.0365043	0.397862	0.113179	6.74456	0.0504111	0.00143669	12DAA	WT vs nam-a1
765	TraesCS3B02G110500.1	0.000439857	0.0365087	-0.638392	0.181623	5.81691	0.268902	0.00629529	12DAA	WT vs nam-a1
766	TraesCS3B02G764300LC.1	0.0004447	0.0368625	-0.62609	0.17827	4.1433	0.114039	0.0187224	12DAA	WT vs nam-a1
767	TraesCS1A02G384000.1	0.000445386	0.0368712	0.517146	0.147267	4.84097	0.0782468	0.010311	12DAA	WT vs nam-a1
768	TraesCS4A02G283600.1	0.000450073	0.0372107	3.90486	1.11287	1.22353	4.10262	1.55052	12DAA	WT vs nam-a1
769	TraesCS3A02G311100.1	0.000453601	0.0374537	0.994572	0.283616	4.44586	0.313036	0.0170941	12DAA	WT vs nam-a1
770	TraesCS7B02G277900.1	0.000457812	0.0376854	3.30497	0.943119	1.91654	5.35087	1.41593	12DAA	WT vs nam-a1
771	TraesCS1A02G447900LC.1	0.000458015	0.0376854	-1.93363	0.551807	2.43386	1.21323	0.184512	12DAA	WT vs nam-a1
772	TraesCS6B02G249500LC.1	0.000458189	0.0376854	0.431149	0.123042	5.53447	0.0486023	0.00396739	12DAA	WT vs nam-a1
773	TraesCS2A02G511000.1	0.000460488	0.0378255	0.540302	0.154251	7.08915	0.11031	0.000929861	12DAA	WT vs nam-a1
774	TraesCS6A02G024100.1	0.000463625	0.037985	-0.395688	0.113023	6.735	0.0850279	0.00138528	12DAA	WT vs nam-a1
775	TraesCS7A02G158900.1	0.000463362	0.037985	-0.43288	0.123642	8.0705	0.0904552	0.00042127	12DAA	WT vs nam-a1
776	TraesCS2B02G467600LC.1	0.000465637	0.0381006	0.524372	0.14983	5.76003	0.139295	0.00328013	12DAA	WT vs nam-a1
777	TraesCS5B02G203600.1	0.000469151	0.0383388	0.580253	0.165892	4.3607	0.117408	0.014169	12DAA	WT vs nam-a1
778	TraesCS3A02G525500.1	0.000470054	0.0383632	0.610068	0.174442	5.28702	0.328681	0.00731695	12DAA	WT vs nam-a1
779	TraesCS5A02G054700.1	0.000472711	0.0385305	-1.37287	0.392724	2.52615	0.562934	0.140771	12DAA	WT vs nam-a1
780	TraesCS2B02G294500.1	0.000474985	0.0386662	0.628737	0.179923	8.0255	0.125882	0.000340424	12DAA	WT vs nam-a1
781	TraesCS2B02G335200.1	0.000479465	0.0389809	-1.05466	0.302025	5.62028	0.472887	0.06474	12DAA	WT vs nam-a1
782	TraesCS1B02G280000.1	0.000480517	0.0390165	-0.981983	0.281259	5.48592	0.56728	0.00496286	12DAA	WT vs nam-a1
783	TraesCS1A02G101300.1	0.000483799	0.0391827	0.539795	0.154688	6.56996	0.0945152	0.0016801	12DAA	WT vs nam-a1
784	TraesCS2A02G493600.1	0.000483559	0.0391827	0.635469	0.182098	8.19544	0.129897	0.00393174	12DAA	WT vs nam-a1
785	TraesCS3A02G415400.2	0.000484501	0.0391897	-0.661992	0.189727	6.85494	0.282749	0.00566418	12DAA	WT vs nam-a1
786	TraesCS3B02G524800.1	0.000485981	0.0392594	-0.927821	0.265976	3.89523	0.370068	0.0329262	12DAA	WT vs nam-a1
787	TraesCS6A02G115400.1	0.000492535	0.0397382	-0.784161	0.225024	6.03061	0.203092	0.0025457	12DAA	WT vs nam-a1
788	TraesCS7B02G440100.2	0.000493984	0.0398046	0.496365	0.14247	6.25547	0.0936493	0.0168082	12DAA	WT vs nam-a1
789	TraesCS2B02G418600.1	0.000501467	0.0402143	-1.01283	0.291046	3.70986	0.372183	0.0290397	12DAA	WT vs nam-a1
790	TraesCS3A02G458400.1	0.000501309	0.0402143	-0.438689	0.126058	5.82488	0.0760683	0.00266654	12DAA	WT vs nam-a1
791	TraesCS6B02G373800.1	0.000501602	0.0402143	0.433174	0.124479	5.83052	0.0501762	0.00627346	12DAA	WT vs nam-a1
792	TraesCS2B02G240800LC.1	0.000499709	0.0402143	-1.48708	0.427211	3.25097	0.750535	0.0720142	12DAA	WT vs nam-a1
793	TraesCS2A02G001200.1	0.000507316	0.0406211	-0.414375	0.119181	5.76723	0.0554147	0.00342043	12DAA	WT vs nam-a1
794	TraesCS6A02G446700LC.1	0.000511174	0.0408784	1.36429	0.392621	5.00361	0.641154	0.0112738	12DAA	WT vs nam-a1
795	TraesCS5A02G203500.1	0.000512316	0.0409182	-0.547286	0.157527	5.46463	0.171582	0.00466703	12DAA	WT vs nam-a1
796	TraesCS4B02G394800.1	0.000514152	0.0410133	-0.463923	0.133569	5.81525	0.121681	0.00382913	12DAA	WT vs nam-a1
797	TraesCS5A02G273000.1	0.000515538	0.0410723	-1.34224	0.386527	2.41351	0.528046	0.106762	12DAA	WT vs nam-a1
798	TraesCS6A02G442500LC.1	0.000517319	0.0411625	-0.584412	0.16834	4.36722	0.11642	0.015921	12DAA	WT vs nam-a1
799	TraesCS7A02G196100.1	0.000521061	0.0414084	0.771379	0.222319	5.11089	0.220411	0.00821134	12DAA	WT vs nam-a1
800	TraesCS2B02G569300.1	0.00052827	0.0419288	-0.617812	0.178249	5.8394	0.204386	0.00362554	12DAA	WT vs nam-a1
801	TraesCS5A02G285000.1	0.000532357	0.0422004	-0.839973	0.242492	4.05273	0.251794	0.0253205	12DAA	WT vs nam-a1
802	TraesCS4A02G386300.1	0.000533317	0.0422238	1.17747	0.339972	2.86236	0.673188	0.116934	12DAA	WT vs nam-a1
803	TraesCS2B02G047300.1	0.000542097	0.0428655	0.787978	0.227802	4.87298	0.198413	0.0153991	12DAA	WT vs nam-a1
804	TraesCS2A02G326300.1	0.000547248	0.0431653	-1.5119	0.437409	3.43431	0.968962	0.314216	12DAA	WT vs nam-a1
805	TraesCS3A02G482600.1	0.000546673	0.0431653	-2.21615	0.641103	2.02101	1.99427	0.151463	12DAA	WT vs nam-a1
806	TraesCS6A02G391800.1	0.000548236	0.0431896	1.04569	0.302572	3.15005	0.392914	0.0551416	12DAA	WT vs nam-a1
807	TraesCS7B02G408900.1	0.000549249	0.0432157	1.30134	0.376597	3.7731	0.592191	0.0420162	12DAA	WT vs nam-a1
808	TraesCS4B02G256600LC.1	0.000551456	0.0433357	1.19371	0.345558	3.17431	1.54064	0.155353	12DAA	WT vs nam-a1
809	TraesCS2B02G251700.1	0.000556445	0.0436198	-1.66525	0.4824	2.28802	1.20521	0.241147	12DAA	WT vs nam-a1
810	TraesCS2B02G142000LC.1	0.000555934	0.0436198	1.84957	0.535759	2.11453	0.990052	0.294241	12DAA	WT vs nam-a1
811	TraesCS2B02G444500.1	0.000557426	0.0436428	-0.825904	0.239287	5.5193	0.219035	0.00609383	12DAA	WT vs nam-a1
812	TraesCS3B02G160100.1	0.000562862	0.0440142	0.39729	0.115193	7.23815	0.102493	0.000946097	12DAA	WT vs nam-a1
813	TraesCS2A02G500600.1	0.000568538	0.0442943	1.2017	0.348703	2.68369	0.587341	0.103646	12DAA	WT vs nam-a1
814	TraesCS2A02G521400.2	0.000567945	0.0442943	-0.723464	0.209914	7.11245	0.332656	0.00574991	12DAA	WT vs nam-a1
815	TraesCS6B02G324000.1	0.000567943	0.0442943	-0.721178	0.209251	4.38707	0.236256	0.0153162	12DAA	WT vs nam-a1
816	TraesCS5A02G048400.1	0.000570264	0.0443744	0.624752	0.18133	6.52058	0.144609	0.00193431	12DAA	WT vs nam-a1
817	TraesCS2B02G295300.1	0.00057873	0.0448853	0.40359	0.117275	6.15327	0.0834831	0.00361964	12DAA	WT vs nam-a1
818	TraesCS6A02G029300.1	0.000577582	0.0448853	1.25441	0.364449	3.55572	0.533	0.0444272	12DAA	WT vs nam-a1
819	TraesCS1B02G506900LC.1	0.000578951	0.0448853	-0.836109	0.242964	3.60721	0.399892	0.0375432	12DAA	WT vs nam-a1
820	TraesCS6A02G024400.1	0.000582328	0.045092	-0.931546	0.270821	4.8061	0.334848	0.0124786	12DAA	WT vs nam-a1
821	TraesCS4A02G299000.1	0.000586681	0.0453186	1.04552	0.304134	3.56399	0.388047	0.0432142	12DAA	WT vs nam-a1
822	TraesCS5A02G518710LC.2	0.000586406	0.0453186	-3.44656	1.00254	1.22045	3.41589	1.07988	12DAA	WT vs nam-a1
823	TraesCS1A02G111300.1	0.000587782	0.0453485	-0.43246	0.125818	5.48611	0.0512425	0.00501243	12DAA	WT vs nam-a1
824	TraesCS5B02G278600.2	0.0005889	0.0453489	-0.64381	0.187335	6.19998	0.148241	0.0463562	12DAA	WT vs nam-a1
825	TraesCS7B02G246200.1	0.000589215	0.0453489	-1.41447	0.411597	3.37488	0.662759	0.0567868	12DAA	WT vs nam-a1
826	TraesCS2A02G251800.1	0.000600385	0.0459081	-0.601401	0.175262	6.09571	0.150826	0.00407227	12DAA	WT vs nam-a1
827	TraesCS2B02G531000.1	0.000600982	0.0459081	-0.653079	0.190337	4.69377	0.138179	0.00904328	12DAA	WT vs nam-a1
828	TraesCS3B02G468400.1	0.000598338	0.0459081	-0.738321	0.215105	3.77662	0.178411	0.0260672	12DAA	WT vs nam-a1
829	TraesCS4B02G091800.1	0.00059904	0.0459081	-0.479407	0.139685	6.88024	0.0934812	0.00103272	12DAA	WT vs nam-a1
830	TraesCS6A02G150000.1	0.000601543	0.0459081	2.3004	0.670492	2.76307	1.6982	0.0912026	12DAA	WT vs nam-a1
831	TraesCS5B02G189500LC.1	0.000597646	0.0459081	0.739704	0.215489	4.00121	0.366193	0.026017	12DAA	WT vs nam-a1
832	TraesCS6A02G028800LC.1	0.000599877	0.0459081	-0.823953	0.240103	3.72332	0.21345	0.0589092	12DAA	WT vs nam-a1
833	TraesCS7B02G129700.1	0.000604954	0.046113	1.10456	0.322087	3.38723	0.697372	0.136751	12DAA	WT vs nam-a1
834	TraesCS3A02G326700.3	0.000605819	0.0461236	0.736205	0.2147	6.56766	0.228948	0.00973031	12DAA	WT vs nam-a1
835	TraesCS4B02G171600.1	0.00060829	0.046201	0.816812	0.238284	6.2697	0.217303	0.00233654	12DAA	WT vs nam-a1
836	TraesCS6A02G201700.1	0.000608059	0.046201	-0.870297	0.25388	3.41782	0.269609	0.0426374	12DAA	WT vs nam-a1
837	TraesCS7A02G506900.1	0.000609922	0.0462695	-1.09828	0.320463	3.79463	0.388125	0.0232675	12DAA	WT vs nam-a1
838	TraesCS5A02G500500.1	0.000611028	0.0462982	-0.919664	0.268384	3.64694	0.46315	0.0326563	12DAA	WT vs nam-a1
839	TraesCS1A02G266900.1	0.000616811	0.0466121	0.565791	0.165237	6.6415	0.11537	0.00154982	12DAA	WT vs nam-a1
840	TraesCS1B02G183100.1	0.000621044	0.0466121	-0.661377	0.193258	4.95747	0.421246	0.0136297	12DAA	WT vs nam-a1
841	TraesCS2B02G358800.1	0.000617776	0.0466121	-2.12299	0.620088	1.59793	1.23646	0.211883	12DAA	WT vs nam-a1
842	TraesCS2B02G541300.1	0.000620488	0.0466121	-0.928792	0.271379	3.24499	0.348505	0.050168	12DAA	WT vs nam-a1
843	TraesCS2B02G566500.1	0.000617195	0.0466121	1.05684	0.308663	2.89247	0.326083	0.0800137	12DAA	WT vs nam-a1
844	TraesCS3A02G039100.1	0.000619106	0.0466121	-1.10792	0.32366	4.49559	0.760083	0.0151517	12DAA	WT vs nam-a1
845	TraesCS3A02G394300.1	0.000618133	0.0466121	0.432195	0.126242	5.53856	0.0803342	0.00559051	12DAA	WT vs nam-a1
846	TraesCS5B02G162100.1	0.000620825	0.0466121	0.416105	0.121585	7.92299	0.0546019	0.00045255	12DAA	WT vs nam-a1
847	TraesCS5B02G349300.1	0.000623044	0.046707	-0.906266	0.264883	6.82795	0.284851	0.00125931	12DAA	WT vs nam-a1
848	TraesCS3B02G563700.1	0.000624055	0.0467276	-1.04496	0.305461	6.506	0.399101	0.00168395	12DAA	WT vs nam-a1
849	TraesCS2A02G089600.1	0.000627104	0.0468454	-0.451279	0.131968	5.18801	0.0616326	0.00568008	12DAA	WT vs nam-a1
850	TraesCS6A02G121300.1	0.000627056	0.0468454	-0.400137	0.117012	5.92176	0.0506094	0.00298801	12DAA	WT vs nam-a1
851	TraesCS1B02G228100.1	0.000630559	0.0468661	0.388725	0.113725	6.83605	0.104568	0.00148596	12DAA	WT vs nam-a1
852	TraesCS3B02G191100.2	0.000628827	0.0468661	-0.837257	0.244893	6.26026	0.235287	0.0318319	12DAA	WT vs nam-a1
853	TraesCS3B02G219100.1	0.000631071	0.0468661	-1.19908	0.350825	2.93735	0.649662	0.140864	12DAA	WT vs nam-a1
854	TraesCS3B02G563200.1	0.000630749	0.0468661	-0.573989	0.167929	5.47196	0.418112	0.0296505	12DAA	WT vs nam-a1
855	TraesCS6A02G253200.2	0.00063066	0.0468661	1.45684	0.426216	3.08923	0.572835	0.273194	12DAA	WT vs nam-a1
856	TraesCS5B02G654100LC.1	0.000640089	0.0474802	-0.394749	0.115625	6.06377	0.0493093	0.00270303	12DAA	WT vs nam-a1
857	TraesCS5B02G144000.1	0.000644379	0.0477427	-1.3401	0.392735	2.59623	0.543185	0.154084	12DAA	WT vs nam-a1
858	TraesCS7B02G167600.1	0.000645731	0.0477871	0.442063	0.129575	7.10971	0.183477	0.00657276	12DAA	WT vs nam-a1
859	TraesCS5A02G525300.1	0.000647129	0.0478348	0.505827	0.148291	6.08312	0.181045	0.00302358	12DAA	WT vs nam-a1
860	TraesCS3B02G598220LC.1	0.000648796	0.0479022	0.963313	0.282467	3.7592	0.36894	0.0323094	12DAA	WT vs nam-a1
861	TraesCS3B02G198800.1	0.000652651	0.0481309	-0.446621	0.131023	5.63054	0.104475	0.0049506	12DAA	WT vs nam-a1
862	TraesCS2B02G023600.1	0.000655536	0.0482876	1.22076	0.358252	2.66309	0.555253	0.11381	12DAA	WT vs nam-a1
863	TraesCS4B02G155800.2	0.000664268	0.0488741	-0.39425	0.115822	6.1979	0.03369	0.00299484	12DAA	WT vs nam-a1
864	TraesCS5B02G466200.1	0.000666466	0.0489791	-0.995083	0.292412	3.99954	0.599956	0.0315138	12DAA	WT vs nam-a1
865	TraesCS3A02G374000.1	0.000670262	0.0492011	-1.14682	0.337154	4.67502	0.468731	0.0411391	12DAA	WT vs nam-a1
866	TraesCS1B02G455200.1	0.000680312	0.0498812	-0.604984	0.178073	4.41676	0.11667	0.0235504	12DAA	WT vs nam-a1
1	TraesCS2B02G168400.1	6.76301e-18	4.3735e-13	2.68562	0.311599	4.57328	1.97209	0.021207	22DAA	WT vs nam-a1
2	TraesCS3A02G052400LC.1	5.44703e-15	1.76124e-10	3.34581	0.428065	3.19018	3.0737	0.127918	22DAA	WT vs nam-a1
3	TraesCS2A02G406900.1	1.31715e-14	2.83926e-10	4.22396	0.54827	6.54394	5.007	0.00537444	22DAA	WT vs nam-a1
4	TraesCS1B02G300600.1	1.29378e-13	2.09166e-09	3.22328	0.435178	4.33645	3.02871	0.0371932	22DAA	WT vs nam-a1
5	TraesCS7A02G369400.1	6.05869e-13	7.83607e-09	1.79155	0.248855	4.73466	0.924722	0.0116014	22DAA	WT vs nam-a1
6	TraesCS2A02G143400.1	1.88799e-12	2.03487e-08	3.03491	0.430942	6.45495	2.2731	0.00297603	22DAA	WT vs nam-a1
7	TraesCS7B02G449200.1	3.66672e-12	3.38742e-08	3.75738	0.540672	3.1496	3.42419	0.223951	22DAA	WT vs nam-a1
8	TraesCS7A02G361000.1	9.64141e-12	7.79363e-08	1.13567	0.166722	5.75965	0.347034	0.00515964	22DAA	WT vs nam-a1
9	TraesCS3B02G310900.1	3.85683e-11	2.77126e-07	1.83498	0.277628	7.04004	1.15037	0.00183539	22DAA	WT vs nam-a1
10	TraesCS6B02G304000.1	5.22534e-11	3.07193e-07	-1.24435	0.189561	5.15921	0.478953	0.00641152	22DAA	WT vs nam-a1
11	TraesCS7B02G259300.1	4.9345e-11	3.07193e-07	1.2533	0.190677	6.02287	0.506247	0.00263275	22DAA	WT vs nam-a1
12	TraesCS7A02G531800.1	5.7478e-11	3.09749e-07	2.86238	0.436994	4.39956	2.35333	0.0297767	22DAA	WT vs nam-a1
13	TraesCS1A02G032900.1	9.50426e-11	4.39015e-07	1.67657	0.258945	4.33418	0.746076	0.0169755	22DAA	WT vs nam-a1
14	TraesCS3A02G049800.1	8.92965e-11	4.39015e-07	3.22206	0.496921	2.85699	3.05938	0.324799	22DAA	WT vs nam-a1
15	TraesCS2B02G438200.1	1.81413e-10	7.82107e-07	2.51652	0.394668	3.23979	2.62573	0.159659	22DAA	WT vs nam-a1
16	TraesCS7B02G448000.1	2.25628e-10	9.11932e-07	4.2124	0.664124	2.40784	5.0794	0.187151	22DAA	WT vs nam-a1
17	TraesCS7A02G531700.1	5.51108e-10	2.09642e-06	3.79757	0.612135	3.9717	3.98291	0.0744909	22DAA	WT vs nam-a1
18	TraesCS7A02G530400.1	1.12652e-09	4.04722e-06	3.51501	0.577142	2.63041	4.23981	0.238251	22DAA	WT vs nam-a1
19	TraesCS7B02G027700.1	1.75176e-09	5.96225e-06	4.45684	0.740426	2.12013	5.029	0.24966	22DAA	WT vs nam-a1
20	TraesCS3B02G462900.1	1.95732e-09	6.32881e-06	1.32933	0.221507	4.77578	0.462522	0.0117529	22DAA	WT vs nam-a1
21	TraesCS7B02G321200.2	2.35788e-09	7.26093e-06	1.41706	0.237323	7.56853	0.810248	0.000709661	22DAA	WT vs nam-a1
22	TraesCS7B02G449100.1	3.48854e-09	1.02544e-05	3.42879	0.580483	4.05747	3.16136	0.0501415	22DAA	WT vs nam-a1
23	TraesCS7B02G266800.2	3.94287e-09	1.1086e-05	1.11263	0.189012	6.24748	0.319893	0.0135506	22DAA	WT vs nam-a1
24	TraesCS2B02G533800.1	4.44136e-09	1.14885e-05	3.03669	0.517602	5.17925	3.04776	0.0161879	22DAA	WT vs nam-a1
25	TraesCS3B02G311000.1	4.36875e-09	1.14885e-05	1.44785	0.24667	5.96568	0.999944	0.00774453	22DAA	WT vs nam-a1
26	TraesCS7A02G219300.1	6.8325e-09	1.6805e-05	1.46383	0.252602	3.79966	0.58402	0.0355352	22DAA	WT vs nam-a1
27	TraesCS7A02G276300.1	7.07993e-09	1.6805e-05	1.36573	0.235917	3.93654	0.529927	0.0251528	22DAA	WT vs nam-a1
28	TraesCS7A02G530600.1	7.27625e-09	1.6805e-05	4.05014	0.70018	5.39981	4.77892	0.0181333	22DAA	WT vs nam-a1
29	TraesCS2B02G044400.1	9.55683e-09	2.13111e-05	2.60055	0.453183	5.60684	1.72363	0.00678341	22DAA	WT vs nam-a1
30	TraesCS2A02G508800.1	1.21773e-08	2.62495e-05	1.02235	0.179447	4.94807	0.29345	0.00832791	22DAA	WT vs nam-a1
31	TraesCS1B02G306500.1	1.39701e-08	2.91426e-05	1.92994	0.340153	5.67962	1.19938	0.00510192	22DAA	WT vs nam-a1
32	TraesCS2B02G538800.1	1.61185e-08	3.25735e-05	2.72061	0.481592	2.39732	2.12456	0.206862	22DAA	WT vs nam-a1
33	TraesCS6B02G421800.1	2.77248e-08	5.43306e-05	0.904912	0.162894	8.3164	0.234378	0.000325959	22DAA	WT vs nam-a1
34	TraesCS1B02G144500.1	3.13324e-08	5.95941e-05	1.39416	0.251935	6.6343	0.562012	0.00177195	22DAA	WT vs nam-a1
35	TraesCS3A02G276800.2	3.85317e-08	7.11934e-05	1.35597	0.246654	6.52308	0.773239	0.00242371	22DAA	WT vs nam-a1
36	TraesCS6B02G246400.1	4.00773e-08	7.19921e-05	4.25955	0.775803	4.48698	5.2399	0.084403	22DAA	WT vs nam-a1
37	TraesCS2B02G424600.1	4.3491e-08	7.40125e-05	1.52153	0.277851	3.61165	0.766035	0.0387432	22DAA	WT vs nam-a1
38	TraesCS6B02G421500.1	4.31093e-08	7.40125e-05	0.818804	0.149482	7.39844	0.196875	0.00129074	22DAA	WT vs nam-a1
39	TraesCS7A02G418900.1	4.66428e-08	7.7341e-05	0.934613	0.17106	5.14767	0.189625	0.00633233	22DAA	WT vs nam-a1
40	TraesCS5A02G531300.1	4.87015e-08	7.87357e-05	1.45122	0.265987	3.67995	0.56332	0.0356062	22DAA	WT vs nam-a1
41	TraesCS7A02G530500.1	6.68729e-08	0.000105477	4.40678	0.816164	5.2888	5.12681	0.102034	22DAA	WT vs nam-a1
42	TraesCS5A02G413600.1	7.023e-08	0.000108134	3.81739	0.708158	2.27164	3.6837	0.397243	22DAA	WT vs nam-a1
43	TraesCS2B02G443800.2	1.07776e-07	0.000162085	4.73331	0.890876	2.9956	5.39998	0.254322	22DAA	WT vs nam-a1
44	TraesCS5B02G283500.1	1.62042e-07	0.000238158	2.73267	0.521669	2.22773	1.83523	0.175673	22DAA	WT vs nam-a1
45	TraesCS1A02G297400.1	1.71934e-07	0.00024708	3.08223	0.589633	3.79973	3.56303	0.0838692	22DAA	WT vs nam-a1
46	TraesCS1A02G456300LC.1	1.98915e-07	0.00027964	-0.792377	0.15237	6.89619	0.190556	0.0015453	22DAA	WT vs nam-a1
47	TraesCS2A02G505500.1	2.72318e-07	0.000374686	2.92804	0.569473	5.39353	2.82478	0.0141694	22DAA	WT vs nam-a1
48	TraesCS6A02G382600.1	3.85116e-07	0.000518847	0.78296	0.154242	7.83334	0.173855	0.000695543	22DAA	WT vs nam-a1
49	TraesCS3A02G426700.1	5.19068e-07	0.000678596	1.22219	0.243506	5.7058	0.415405	0.00380959	22DAA	WT vs nam-a1
50	TraesCS4A02G121000.1	5.24677e-07	0.000678596	1.10512	0.220273	7.49797	0.316456	0.0166482	22DAA	WT vs nam-a1
51	TraesCS1A02G291200.1	5.37926e-07	0.00068209	1.80946	0.361006	4.48105	0.998661	0.0150991	22DAA	WT vs nam-a1
52	TraesCS3A02G175300.1	6.34084e-07	0.000788557	-0.966654	0.194086	4.75432	0.254543	0.014757	22DAA	WT vs nam-a1
53	TraesCS3B02G091800.3	7.57575e-07	0.000907238	1.26177	0.255111	5.57449	0.42634	0.00588277	22DAA	WT vs nam-a1
54	TraesCS5A02G190000.1	7.46608e-07	0.000907238	0.848722	0.1715	5.26356	0.1894	0.00858485	22DAA	WT vs nam-a1
55	TraesCS3B02G051400LC.1	8.02343e-07	0.000943381	0.960489	0.194636	6.72864	0.23109	0.00142241	22DAA	WT vs nam-a1
56	TraesCS1A02G430200.1	8.28526e-07	0.00095677	-1.39005	0.282042	5.58277	0.631258	0.00673984	22DAA	WT vs nam-a1
57	TraesCS6A02G216500.1	9.87086e-07	0.00111987	4.31033	0.880701	4.10216	5.44966	0.155215	22DAA	WT vs nam-a1
58	TraesCS2A02G458800.1	1.05069e-06	0.00115163	-1.95329	0.400108	2.74878	0.99277	0.12121	22DAA	WT vs nam-a1
59	TraesCS4A02G048300.1	1.04523e-06	0.00115163	1.14733	0.234968	4.58512	0.331205	0.0136479	22DAA	WT vs nam-a1
60	TraesCS3B02G266000.1	1.11771e-06	0.00120467	0.945651	0.194191	6.46764	0.367023	0.0024575	22DAA	WT vs nam-a1
61	TraesCS3B02G051300LC.1	1.18839e-06	0.00125985	0.725984	0.149454	6.16401	0.137722	0.00272262	22DAA	WT vs nam-a1
62	TraesCS7A02G369100.1	1.37184e-06	0.00143087	0.70089	0.14514	6.67971	0.144241	0.00144952	22DAA	WT vs nam-a1
63	TraesCS7B02G319100.1	1.43485e-06	0.00147284	1.14275	0.237081	4.56353	0.398737	0.0155103	22DAA	WT vs nam-a1
64	TraesCS7B02G063200.1	1.87889e-06	0.0018985	1.73358	0.363736	5.51413	0.999019	0.00963456	22DAA	WT vs nam-a1
65	TraesCS4B02G242200.1	1.97973e-06	0.00196962	1.22247	0.257066	6.33904	0.400645	0.00254234	22DAA	WT vs nam-a1
66	TraesCS2B02G489900.1	2.17326e-06	0.0021294	0.888378	0.187556	5.35781	0.231775	0.00548296	22DAA	WT vs nam-a1
67	TraesCS7A02G213100.1	2.31147e-06	0.00223102	1.62693	0.34439	3.38039	0.710094	0.116559	22DAA	WT vs nam-a1
68	TraesCS1B02G465000.1	3.35981e-06	0.00319518	-1.1279	0.242689	6.48097	0.531541	0.00310343	22DAA	WT vs nam-a1
69	TraesCS2B02G802100LC.1	4.84119e-06	0.00453725	2.15131	0.470585	2.5583	1.32467	0.196183	22DAA	WT vs nam-a1
70	TraesCS7A02G226600.1	5.54511e-06	0.00512273	1.52894	0.336547	3.22898	0.79513	0.0986292	22DAA	WT vs nam-a1
71	TraesCS2A02G264800.2	5.97581e-06	0.00544286	4.77784	1.05535	1.6244	5.98416	1.39411	22DAA	WT vs nam-a1
72	TraesCS2A02G266900.1	6.10404e-06	0.00548244	-0.787264	0.174067	5.1337	0.247958	0.00816131	22DAA	WT vs nam-a1
73	TraesCS4B02G256600.1	6.28172e-06	0.00556475	1.30496	0.288921	4.48279	0.698662	0.0167092	22DAA	WT vs nam-a1
74	TraesCS4B02G222300.2	6.83356e-06	0.00596718	-3.59003	0.797995	1.47826	2.85619	0.589086	22DAA	WT vs nam-a1
75	TraesCS5B02G141900.1	6.92055e-06	0.00596718	-0.681772	0.151636	6.40165	0.177556	0.00180485	22DAA	WT vs nam-a1
76	TraesCS4A02G170900.1	7.16404e-06	0.00609584	1.28835	0.287017	4.39565	0.62829	0.0151423	22DAA	WT vs nam-a1
77	TraesCS1A02G297500.1	7.88682e-06	0.0066237	2.3579	0.527703	4.90502	1.87055	0.0126613	22DAA	WT vs nam-a1
78	TraesCS4A02G083900.1	8.11794e-06	0.0067304	-0.767295	0.17196	7.44457	0.220415	0.000700819	22DAA	WT vs nam-a1
79	TraesCS3A02G482600.1	8.64415e-06	0.00697786	-1.54783	0.347939	2.88879	0.579312	0.0775952	22DAA	WT vs nam-a1
80	TraesCS3B02G448000.1	8.74013e-06	0.00697786	0.980387	0.2205	4.62422	0.259612	0.0114747	22DAA	WT vs nam-a1
81	TraesCS6A02G131600.1	8.66613e-06	0.00697786	-0.831622	0.186964	5.15208	0.218786	0.00683139	22DAA	WT vs nam-a1
82	TraesCS7A02G420000.1	9.06764e-06	0.00715105	1.43239	0.322734	5.02455	0.776214	0.0089787	22DAA	WT vs nam-a1
83	TraesCS5A02G527400.1	1.0497e-05	0.00817852	2.14077	0.485801	2.28203	1.14529	0.184172	22DAA	WT vs nam-a1
84	TraesCS2B02G355500.1	1.07195e-05	0.00825251	-0.826605	0.187774	5.33322	0.230622	0.00592232	22DAA	WT vs nam-a1
85	TraesCS1A02G125500.1	1.08559e-05	0.00825916	1.61968	0.368161	5.66485	0.807609	0.00652376	22DAA	WT vs nam-a1
86	TraesCS1A02G394200.1	1.12858e-05	0.0084864	-1.36462	0.31078	3.12546	0.752453	0.0562596	22DAA	WT vs nam-a1
87	TraesCS1A02G076700.1	1.30973e-05	0.00973538	3.36726	0.772578	5.79078	4.7165	0.0145392	22DAA	WT vs nam-a1
88	TraesCS5B02G477900.1	1.58662e-05	0.0116595	-0.903133	0.209238	4.76724	0.341878	0.010469	22DAA	WT vs nam-a1
89	TraesCS4B02G232100.3	1.75041e-05	0.0127186	-5.18749	1.20792	1.82593	7.11199	2.45327	22DAA	WT vs nam-a1
90	TraesCS3B02G453800.1	1.79715e-05	0.0129131	0.741283	0.172845	5.92006	0.219138	0.00381215	22DAA	WT vs nam-a1
91	TraesCS6A02G393500.1	1.88922e-05	0.0134255	-2.56638	0.599958	1.5689	2.13054	0.101778	22DAA	WT vs nam-a1
92	TraesCS3B02G563100.2	2.33447e-05	0.0164093	-3.68603	0.871352	3.88555	5.79255	0.812382	22DAA	WT vs nam-a1
93	TraesCS6B02G421700.1	2.43064e-05	0.0169016	0.790183	0.187196	5.77668	0.225318	0.00439224	22DAA	WT vs nam-a1
94	TraesCS2A02G482400.1	2.80851e-05	0.0193213	-2.95817	0.706267	2.56604	2.79466	0.778547	22DAA	WT vs nam-a1
95	TraesCS7B02G335200.1	2.9456e-05	0.0200512	1.2663	0.303115	5.13464	0.452645	0.0102249	22DAA	WT vs nam-a1
96	TraesCS7A02G089700.1	3.07347e-05	0.0207037	-0.935626	0.224481	4.13149	0.267671	0.0204667	22DAA	WT vs nam-a1
97	TraesCS4B02G338400.1	3.11311e-05	0.0207545	-1.92322	0.461755	2.86326	1.20278	0.195689	22DAA	WT vs nam-a1
98	TraesCS4A02G132000.1	3.74586e-05	0.0247181	-4.05654	0.983972	3.14943	5.37796	1.49037	22DAA	WT vs nam-a1
99	TraesCS6B02G302200.1	3.82813e-05	0.0250058	1.33708	0.324723	3.41376	0.729074	0.0963113	22DAA	WT vs nam-a1
100	TraesCS1A02G456400LC.1	3.90473e-05	0.0252511	-0.732897	0.178188	6.68929	0.185175	0.00188498	22DAA	WT vs nam-a1
101	TraesCS5A02G460000.1	3.99924e-05	0.0256062	-2.78285	0.6775	3.0997	2.20999	0.100109	22DAA	WT vs nam-a1
102	TraesCS4A02G325800.1	4.14843e-05	0.0263011	-1.45563	0.355114	3.07902	1.42206	0.106423	22DAA	WT vs nam-a1
103	TraesCS6A02G317900.1	4.38155e-05	0.0275093	1.88809	0.462044	3.68626	1.399	0.238777	22DAA	WT vs nam-a1
104	TraesCS1A02G565200LC.1	5.00805e-05	0.0311405	-2.44877	0.603853	2.29512	3.368	0.3348	22DAA	WT vs nam-a1
105	TraesCS5A02G140000.1	5.25886e-05	0.0323886	0.763005	0.188684	5.32246	0.225987	0.00527143	22DAA	WT vs nam-a1
106	TraesCS4A02G394600.1	5.39624e-05	0.032789	2.43025	0.601879	2.08854	1.91058	0.13456	22DAA	WT vs nam-a1
107	TraesCS5B02G536200.1	5.42529e-05	0.032789	0.98638	0.244365	6.4041	0.533226	0.00860377	22DAA	WT vs nam-a1
108	TraesCS3A02G397900.1	5.66071e-05	0.0338951	-1.13212	0.281166	3.84158	0.776143	0.0467911	22DAA	WT vs nam-a1
109	TraesCS2A02G132300.1	6.27999e-05	0.0372582	1.40623	0.351378	5.7061	0.566908	0.00516813	22DAA	WT vs nam-a1
110	TraesCS4B02G114800.5	6.37251e-05	0.0374634	4.83235	1.20852	1.57629	5.81021	2.30802	22DAA	WT vs nam-a1
111	TraesCS3B02G299300.2	6.62825e-05	0.0386158	0.639228	0.160238	7.61753	0.116316	0.00383818	22DAA	WT vs nam-a1
112	TraesCS5A02G210000.1	6.91116e-05	0.0399045	-0.766491	0.192618	4.68239	0.185377	0.0117625	22DAA	WT vs nam-a1
113	TraesCS5B02G120800.1	7.089e-05	0.0405691	0.668826	0.168331	5.31201	0.153961	0.00720379	22DAA	WT vs nam-a1
114	TraesCS1B02G425200.1	7.27556e-05	0.041092	-0.674272	0.169967	5.37498	0.168182	0.00599684	22DAA	WT vs nam-a1
115	TraesCS3A02G278700.3	7.33538e-05	0.041092	4.23228	1.06737	1.94028	4.82773	1.86789	22DAA	WT vs nam-a1
116	TraesCS4A02G088200.1	7.37099e-05	0.041092	-0.905645	0.228469	4.52302	0.335824	0.0148554	22DAA	WT vs nam-a1
117	TraesCS6B02G257900.1	7.47736e-05	0.0413287	-5.15123	1.30063	2.37564	7.86692	3.00449	22DAA	WT vs nam-a1
118	TraesCS3A02G463400.2	7.55593e-05	0.041409	-5.36589	1.35569	2.15152	7.28457	3.34715	22DAA	WT vs nam-a1
119	TraesCS2B02G489600.2	7.89775e-05	0.0429186	-1.09468	0.277311	8.2884	0.408864	0.0011456	22DAA	WT vs nam-a1
120	TraesCS6A02G203900LC.1	8.1019e-05	0.0436612	-3.58645	0.909951	1.77228	3.01409	1.16297	22DAA	WT vs nam-a1
121	TraesCS2A02G508200.1	8.17872e-05	0.0437109	0.654682	0.166201	6.89333	0.125866	0.00135606	22DAA	WT vs nam-a1
122	TraesCS4A02G415600.1	8.69474e-05	0.0460878	1.43134	0.364728	2.80152	0.456991	0.0886881	22DAA	WT vs nam-a1
123	TraesCS7A02G428200.1	8.82025e-05	0.046373	-1.16088	0.296071	3.36304	0.389368	0.0470293	22DAA	WT vs nam-a1
124	TraesCS5A02G098600.1	8.97801e-05	0.0468218	1.22755	0.313415	3.13576	0.3462	0.0605128	22DAA	WT vs nam-a1
125	TraesCS4A02G100900.1	9.27338e-05	0.0475028	-1.76573	0.451725	2.3799	1.06492	0.146732	22DAA	WT vs nam-a1
126	TraesCS4B02G152400.6	9.32897e-05	0.0475028	-4.42252	1.13183	2.28059	4.80249	2.27383	22DAA	WT vs nam-a1
127	TraesCS5B02G208000.1	9.28687e-05	0.0475028	-1.28615	0.329066	4.77513	0.557937	0.00979565	22DAA	WT vs nam-a1
128	TraesCS2A02G505300.1	9.69149e-05	0.0489632	1.02907	0.263986	3.50914	0.269831	0.0308283	22DAA	WT vs nam-a1
129	TraesCS5B02G469600.1	9.94636e-05	0.0494778	-3.08171	0.791828	2.76822	2.96038	0.0723454	22DAA	WT vs nam-a1
130	TraesCS3B02G239900LC.2	9.92459e-05	0.0494778	-4.08162	1.0486	1.75063	3.64884	1.69419	22DAA	WT vs nam-a1
